# Supplementary material for: A Rh(ii)/phosphoric acid co-catalyzed three-component reaction of diazo-ketones with alcohols and azonaphthalenes: access to indole derivatives via a formal [3 + 2]-cycloaddition
Source: Royal Society of Chemistry journal article supplement (doi:10.1039/d0ob02189j), 2020-01-01
Supplement: d0ob02189j1.pdf [file d0ob02189j1.pdf]

## SUPPORTING INFORMATION

# **Rh(II)/Phosphoric acid co-catalyzed three-component reaction of diazo-ketones with alcohols and azonaphthalenes: Access to indole derivatives via a formal [3+2]-cycloaddition**

Xinru Yin, Aimin Xu, Jidi Hu, Ming Bao, Wenhao Hu,\* Yu Qian,\*

Guangdong Provincial Key Laboratory of Chiral Molecule and Drug Discovery, School of Pharmaceutical Sciences, Sun Yat-sen University, Guangzhou 510006, China.

Email: [huwh9@mail.sysu.edu.cn](mailto:huwh9@mail.sysu.edu.cn); [qianyu5@mail.sysu.edu.cn](mailto:qianyu5@mail.sysu.edu.cn)

## Table of Contents

|                                                                                                    |                |
|----------------------------------------------------------------------------------------------------|----------------|
| <b>1. General Information</b>                                                                      | <b>S2</b>      |
| <b>2. General Procedure for the Preparation of Azonaphthalenes 3</b>                               | <b>S3-S5</b>   |
| <b>3. General Procedure for the Annulation of diazo-ketones with alcohols and azonaphthalenes.</b> | <b>S6</b>      |
| <b>4. NMR data for Compounds 5, 6, 7</b>                                                           | <b>S6-S24</b>  |
| <b>5. Scale Up Reaction</b>                                                                        | <b>S25</b>     |
| <b>6. Control Experiment</b>                                                                       | <b>S25-S28</b> |
| <b>7. References</b>                                                                               | <b>S29</b>     |
| <b>8. <sup>1</sup>H and <sup>13</sup>C NMR Spectra for Compounds 3, 5, 6, 7</b>                    | <b>S30-S71</b> |
| <b>9. Single-Crystal X-ray Diffraction of 5p, 5t and 7a</b>                                        | <b>S72-S76</b> |

## 1. General Information

All reactions were carried out in oven-dried glassware. Solvents were dried by the standard methods. Flash column chromatography was performed using silica gel (300-400 mesh). Analytical thin-layer chromatography was performed using glass plates pre-coated with 200-300 mesh silica gel impregnated with a fluorescent indicator (254 nm).  $^1\text{H}$  NMR and  $^{13}\text{C}$  NMR spectra were recorded in DMSO-*d*<sub>6</sub> on a 400 or 500 MHz spectrometer; chemical shifts were reported in ppm with the solvent signal as reference, and coupling constants (*J*) were given in Hertz. The peak information was described as: br = broad, s = singlet, d = doublet, t = triplet, q = quartet, m = multiplet, comp = composite. High-resolution mass spectra (HRMS) were recorded on a commercial apparatus (ESI or CI Source).

**Materials:**  $\text{CH}_2\text{Cl}_2$  &  $\text{ClCH}_2\text{CH}_2\text{Cl}$  was distilled over calcium hydride ( $\text{CaH}_2$ ) prior to use. 4 Å molecular sieves were dried in a Muffle furnace at 250 °C over 5 hrs. Alcohols and phosphoric acid **4a**, **4d**, **4e**, **4f** was commercial available, diazo ketones **1** were prepared according to the literature procedures <sup>[1]</sup> and **3** were synthesized similarly to the literature.<sup>[2]</sup> Phosphoric acid **4b**, **4c** were prepared according to the literature.<sup>[3]</sup> All small scale reactions were carried out under argon atmosphere in a well-dried glassware. Reactions were monitored by TLC on silica gel using a combination of hexane and ethyl acetate as eluents. Reactions were generally run under a nitrogen atmosphere. Solvents were distilled prior to use; petroleum ether with a boiling range of 60 to 80 °C was used. Silica gel (300–400 mesh) were used for column chromatography (20–30 g per one gram of crude material).

## 2. General Procedure for the Preparation of Azonaphthalenes 3.

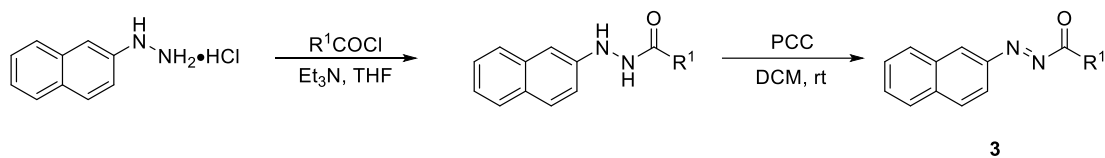

To a solution of 2-Naphthylhydrazine hydrochloride (2.0 g, 10.0 mmol) in THF (20.0 mL) was added Et<sub>3</sub>N (3.1 mL, 22.0 mmol). The mixture was cooled to 0 °C and the corresponding chloroformate or substituted benzoyl chloride (11.0 mmol) was added dropwise under stirring. The reaction mixture was then stirred for additional 15 min at 0 °C and 1 h at room temperature. Then reaction was then quenched with water (20 mL) and extracted with CH<sub>2</sub>Cl<sub>2</sub> (5 x 10 mL), the organic layers were combined and washed with saturated aq. NaHCO<sub>3</sub> (50 mL) and brine (50 mL). After dried over Na<sub>2</sub>SO<sub>4</sub> and concentrated to ~20 mL, PCC (3.2 g, 15.0 mmol) was then added in and stirred at room temperature until hydrazide completely consumed (monitored by TLC). The reaction mixture was then filtered through celite and the filtrate was concentrated and purified by silica gel flash chromatography (n-Hexanes: EtOAc = 100:1 to 20:1) to afford pure products **3** as solid.

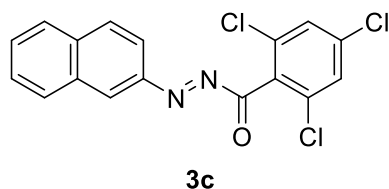

**(E)-(Naphthalen-2-ylidiazenyl)(2,4,6-trichlorophenyl)methanone (3c).** 44% yield. Dark red solid, mp = 115.1-117.3 °C. <sup>1</sup>H NMR (500 MHz, CDCl<sub>3</sub>) δ 8.54 (s, 1H), 8.00 (d, *J* = 6.7 Hz, 2H), 7.90 (d, *J* = 8.4 Hz, 2H), 7.65 (t, *J* = 7.5 Hz, 1H), 7.59 (t, *J* = 7.5 Hz, 1H), 7.39 (s, 2H); <sup>13</sup>C NMR (125 MHz, CDCl<sub>3</sub>) δ 179.2, 149.6, 136.8, 136.5, 134.7, 134.2, 133.1, 132.9, 130.3, 129.9, 129.8, 128.2, 128.0, 127.5, 115.5; HRMS (TOF MS CI<sup>+</sup>) calculated for C<sub>17</sub>H<sub>9</sub>Cl<sub>3</sub>N<sub>2</sub>O [M+H]<sup>+</sup>: 362.9853, found: 362.9851.

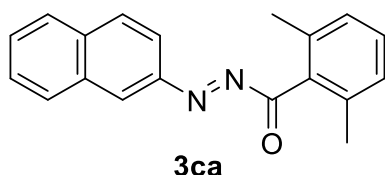

**(E)-(2,6-Dimethylphenyl) (naphthalen-2-yl) diazenyl methanone (3ca).** 63% yield. Dark red solid, mp = 213.8-214.9 °C. <sup>1</sup>H NMR (500 MHz, CDCl<sub>3</sub>) δ 8.55 (s, 1H), 8.02 (d, *J* = 7.9 Hz, 1H), 7.96 – 7.89 (comp, 3H), 7.66 – 7.58 (comp, 2H), 7.31 – 7.28 (m, 1H), 7.13 (d, *J* = 7.4 Hz, 2H), 2.46 (s, 6H); <sup>13</sup>C NMR (125 MHz, CDCl<sub>3</sub>) δ 188.2, 149.6, 136.0, 135.8, 134.9, 133.2, 132.1, 130.2, 129.9, 129.5, 129.0, 128.1, 127.8, 127.2, 115.6, 20.6; HRMS (TOF MS CI<sup>+</sup>) calculated for C<sub>19</sub>H<sub>16</sub>N<sub>2</sub>O [M+H]<sup>+</sup>: 289.1335, found: 289.1338.

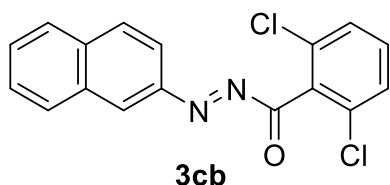

**(E)-(2,6-Dichlorophenyl) (naphthalen-2-yl) diazenyl methanone (3cb).** 51% yield. Dark red solid, mp = 152.9-154.2 °C. <sup>1</sup>H NMR (500 MHz, CDCl<sub>3</sub>) δ 8.56 (s, 1H), 8.02 (t, *J* = 6.5 Hz, 2H), 7.92 (d, *J* = 8.5 Hz, 2H), 7.67 (t, *J* = 7.4 Hz, 1H), 7.60 (t, *J* = 7.4 Hz, 1H), 7.39 (s, 3H); <sup>13</sup>C NMR (125 MHz, CDCl<sub>3</sub>) δ 178.0, 149.6, 136.7, 135.5, 134.3, 133.1, 132.3, 131.3, 130.2, 129.7 (two carbon signals overlapped), 128.2, 127.8, 127.4, 115.6; HRMS (TOF MS CI<sup>+</sup>) calculated for C<sub>17</sub>H<sub>10</sub>Cl<sub>2</sub>N<sub>2</sub>O [M+H]<sup>+</sup>: 329.0243, found: 329.0244.

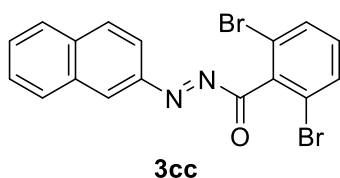

**(E)-(2,6-Dibromophenyl) (naphthalen-2-yl) diazenyl methanone (3cc).** 51% yield. Dark red solid, mp = 129.1-131.3 °C. <sup>1</sup>H NMR (400 MHz, CDCl<sub>3</sub>) δ 8.54 (s, 1H), 8.00 (d, *J* = 3.0 Hz, 2H), 7.91 – 7.86 (m, 2H), 7.66 – 7.56 (m, 4H), 7.20 (td, *J* = 8.1, 3.5 Hz, 1H); <sup>13</sup>C NMR (100 MHz, CDCl<sub>3</sub>) δ 180.3, 149.7, 139.8, 136.7, 134.5, 133.1, 131.7,

131.3, 130.2, 129.7 (two carbon signals overlapped), 128.18, 127.4, 120.1, 115.5; HRMS (TOF MS  $\text{Cl}^+$ ) calculated for  $\text{C}_{17}\text{H}_{10}\text{Br}_2\text{N}_2\text{O}$   $[\text{M}+\text{H}]^+$ : 416.9233, found: 416.9237.

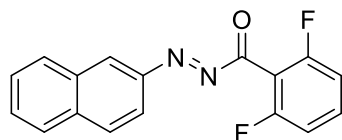

**3cd**

**(*E*)-(2,6-Difluorophenyl)(naphthalen-2-yl)diazenylmethanone.** 56% yield. Dark red solid,  $^1\text{H}$  NMR (500 MHz,  $\text{CDCl}_3$ )  $\delta$  8.57 (s, 1H), 8.07 – 7.98 (m, 2H), 7.92 (d,  $J = 8.6$  Hz, 2H), 7.65 (m, 1H), 7.60 (m, 1H), 7.57 – 7.52 (m, 1H), 7.04 (t,  $J = 8.5$  Hz, 2H);  $^{13}\text{C}$  NMR (125 MHz,  $\text{CDCl}_3$ )  $\delta$  177.7,  $\delta$  161.31 (d,  $J = 257.9$  Hz), 149.5, 136.3, 134.4 (d,  $J = 10.6$  Hz), 134.3 (d,  $J = 10.5$  Hz) 133.1, 132.8, 130.1, 129.6, 129.3, 128.1, 127.3, 115.7, 112.3 (d,  $J = 21.7$  Hz);  $^{19}\text{F}$  NMR (376 MHz,  $\text{CDCl}_3$ )  $\delta$  -106.65; HRMS (TOF MS  $\text{Cl}^+$ ) calculated for  $\text{C}_{17}\text{H}_{10}\text{F}_2\text{N}_2\text{O}$   $[\text{M}+\text{H}]^+$ : 297.0834, found: 297.0839.

### 3. General Procedure for the Annulation of diazo-ketones with alcohols and azonaphthalenes.

To a 10 mL oven-dried vial with a magnetic stirring bar was added azo compounds **3** (0.2 mmol), alcohol **2** (0.24 mmol), Rh<sub>2</sub>(OAc)<sub>4</sub> (1.12 mg, 2.5 mol%), acid **4c** (5.0 mol%), 4Å molecular sieves (100 mg) and anhydrous DCE (1.0 mL) in sequence under atmosphere of argon. The reaction mixture was stirred at 0 °C for 10 minutes and diazo ketones **1** (0.30 mmol) in anhydrous DCE (1.0 mL) were added to the above mixture for 1.0 h via a syringe pump. After completion of the addition, the reaction was running for additional 10 minutes under these conditions. When the reaction was completed (monitored by TLC), the reaction mixture was filtered through celite and the filtrate was concentrated and purified by silica gel flash chromatography (n-Hexanes: EtOAc: CH<sub>2</sub>Cl<sub>2</sub> = 15:1:1 to 5:1:1) to afford pure products **5-7** as viscous solid or liquid.

### 4. NMR data for Compounds **5**, **6**, **7**

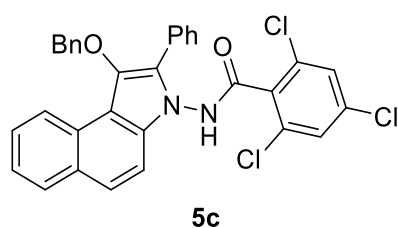

#### *N*-[1-(Benzyloxy)-2-phenyl-3*H*-benzo[*e*]indol-3-yl]-2,4,6-trichlorobenzamide (**5c**).

83 mg, 70% yield. White solid, mp = 223.9-225.9 °C; <sup>1</sup>H NMR (400 MHz, DMSO) δ 12.20 (s, 1H), 8.60 (d, *J* = 8.2 Hz, 1H), 8.01 (d, *J* = 8.0 Hz, 1H), 7.89 – 7.72 (comp, 4H), 7.67 (d, *J* = 8.1 Hz, 2H), 7.63 – 7.58 (m, 1H), 7.53 – 7.40 (comp, 4H), 7.34 (s, 5H), 4.92 (d, *J* = 11.1 Hz, 1H), 4.82 (d, *J* = 11.1 Hz, 1H); <sup>13</sup>C NMR (125 MHz, DMSO) δ 163.0, 137.5, 137.3, 136.2, 133.0, 132.9, 131.9, 130.5, 129.9, 129.1, 128.9, 128.8, 128.5, 128.5, 128.2, 127.3, 126.9, 124.8, 124.3, 123.6, 113.5, 111.7, 75.9; HRMS (TOF MS Cl<sup>+</sup>) calculated for C<sub>32</sub>H<sub>21</sub>Cl<sub>3</sub>N<sub>2</sub>O<sub>2</sub> [M+Na]<sup>+</sup>: 593.0561, found: 593.0569.

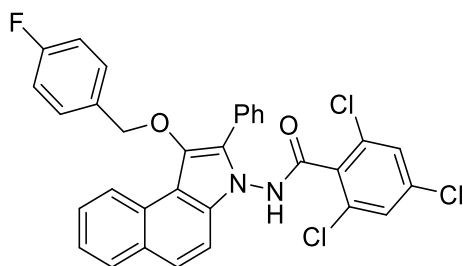

**5d**

**2,4,6-Trichloro-*N*-{1-[(4-fluorobenzyl)oxy]-2-phenyl-3*H*-benzo[*e*]indol-3-yl}benzamide (5d).** 79.8 mg, 68% yield. White solid, mp = 209.6-211.8 °C; <sup>1</sup>H NMR (500 MHz, DMSO) δ 12.19 (s, 1H), 8.57 (d, *J* = 8.1 Hz, 1H), 8.01 (d, *J* = 7.9 Hz, 1H), 7.83 – 7.72 (comp, 4H), 7.61 (t, *J* = 7.3 Hz, 3H), 7.48 (t, *J* = 7.4 Hz, 3H), 7.44 – 7.40 (m, 1H), 7.31 (dd, *J* = 8.4, 5.7 Hz, 2H), 7.12 (t, *J* = 8.9 Hz, 2H), 4.92 (d, *J* = 11.2 Hz, 1H), 4.80 (d, *J* = 11.2 Hz, 1H); <sup>13</sup>C NMR (125 MHz, DMSO) δ 163.0, 162.4 (d, *J* = 244.1 Hz), 137.2, 136.2, 133.5, 133.1, 132.9, 132.0, 130.8, 130.5, 129.9, 129.1 (two carbon signals overlapped), 128.8, 128.7, 128.4, 128.4, 127.3, 126.9, 124.8, 124.3, 123.6, 115.4 (d, *J* = 21.4 Hz), 113.6, 111.7, 75.1.; <sup>19</sup>F NMR (376 MHz, DMSO) δ -114.14; HRMS (TOF MS CI<sup>+</sup>) calculated for C<sub>32</sub>H<sub>20</sub>Cl<sub>3</sub>FN<sub>2</sub>O<sub>2</sub> [M+H]<sup>+</sup>: 589.0647, found: 589.0642.

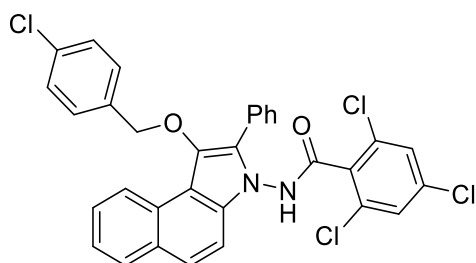

**5e**

**2,4,6-Trichloro-*N*-{1-[(4-chlorobenzyl)oxy]-2-phenyl-3*H*-benzo[*e*]indol-3-yl}benzamide (5e).** 79.7 mg, 66% yield. White solid, mp = 221.1-223.4 °C; <sup>1</sup>H NMR (400 MHz, DMSO) δ 12.20 (s, 1H), 8.57 (d, *J* = 8.1 Hz, 1H), 8.01 (d, *J* = 8.0 Hz, 1H), 7.78 (d, *J* = 10.2 Hz, 4H), 7.61 (t, *J* = 7.3 Hz, 3H), 7.48 (t, *J* = 7.2 Hz, 3H), 7.43 – 7.39 (m, 1H), 7.35 (d, *J* = 8.2 Hz, 2H), 7.29 (d, *J* = 8.2 Hz, 2H), 4.94 (d, *J* = 11.2 Hz, 1H), 4.82 (d, *J* = 11.2 Hz, 1H); <sup>13</sup>C NMR (100 MHz, DMSO) δ 163.0, 137.1, 136.1, 133.1, 133.0, 132.9, 132.0, 130.5, 130.3, 129.9, 129.1, 129.0, 128.6, 128.7, 128.4, 127.3, 127.0, 124.8, 124.3, 123.6, 113.5, 111.7, 75.0; HRMS (TOF MS CI<sup>+</sup>) calculated for

$C_{32}H_{20}Cl_4N_2O_2$   $[M+H]^+$ : 605.0352, found: 605.0363.

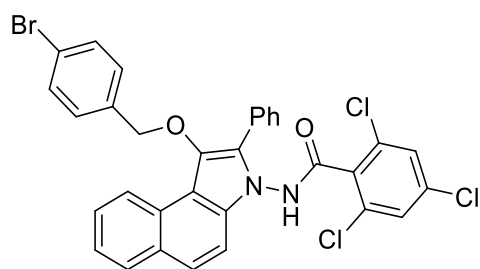

**5f**

***N*-{1-[(4-bromobenzyl)oxy]-2-phenyl-3*H*-benzo[*e*]indol-3-yl}-2,4,6-**

**trichlorobenzamide (5f).** 88 mg, 68% yield. White solid, mp = 215.1-217.3 °C;  $^1H$  NMR (400 MHz, DMSO)  $\delta$  12.18 (s, 1H), 8.55 (d,  $J$  = 8.1 Hz, 1H), 8.01 (d,  $J$  = 8.0 Hz, 1H), 7.85 – 7.72 (comp, 4H), 7.63 – 7.58 (comp, 3H), 7.48 (t,  $J$  = 8.9 Hz, 5H), 7.43 – 7.39 (comp, 1H), 7.23 (d,  $J$  = 8.1 Hz, 2H), 4.93 (d,  $J$  = 11.6 Hz, 1H), 4.80 (d,  $J$  = 11.6 Hz, 1H);  $^{13}C$  NMR (125 MHz, DMSO)  $\delta$  163.0, 137.1, 136.6, 136.2, 133.0, 132.9, 132.0, 131.7, 130.6, 130.5, 129.9, 129.1, 129.1, 128.8, 128.7, 128.40 127.3, 127.0, 124.8, 124.3, 123.6, 121.7, 113.5, 111.7, 75.0; HRMS (TOF MS  $Cl^+$ ) calculated for  $C_{32}H_{20}Cl_3BrN_2O_2$   $[M-H]^-$ : 646.9701, found: 646.9703.

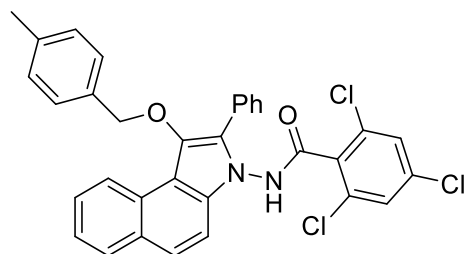

**5g**

**2,4,6-Trichloro-*N*-{1-[(4-methylbenzyl)oxy]-2-phenyl-3*H*-benzo[*e*]indol-3-**

**yl}benzamide (5g).** 75.9 mg, 65% yield. White solid, mp = 222.5-224.5 °C;  $^1H$  NMR (500 MHz, DMSO)  $\delta$  12.19 (s, 1H), 8.62 (d,  $J$  = 6.8 Hz, 1H), 8.00 (d,  $J$  = 6.6 Hz, 1H), 7.78 (d,  $J$  = 19.8 Hz, 4H), 7.66 (s, 2H), 7.60 (s, 1H), 7.50 (s, 3H), 7.43 (s, 1H), 7.19 (s, 2H), 7.14 (s, 2H), 4.87 (d,  $J$  = 9.6 Hz, 1H), 4.77 (d,  $J$  = 9.3 Hz, 1H), 2.29 (s, 3H);  $^{13}C$  NMR (125 MHz, DMSO)  $\delta$  163.0, 137.8, 137.5, 136.2, 134.3, 133.1, 132.9, 132.0, 130.5, 129.9, 129.4, 129.2, 129.1, 128.8, 128.7, 128.6, 128.4, 128.2, 127.4, 126.9, 124.7, 124.3, 123.6, 113.6, 111.69, 75.8, 21.3; HRMS (TOF MS  $Cl^+$ ) calculated for  $C_{33}H_{23}Cl_3N_2O_2$   $[M+Na]^+$ : 607.0717, found: 607.0710.



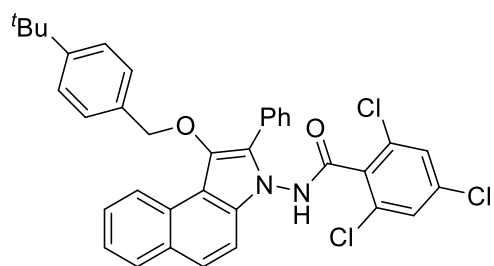

5h

***N*-{1-[(4-(Tert-butyl)benzyl)oxy]-2-phenyl-3*H*-benzo[*e*]indol-3-yl}-2,4,6-trichlorobenzamide (5h).** 56.3 mg, 45% yield. White solid, mp = 224.4-225.9 °C; <sup>1</sup>H NMR (400 MHz, DMSO) δ 12.19 (s, 1H), 8.64 (d, *J* = 8.2 Hz, 1H), 8.01 (d, *J* = 8.0 Hz, 1H), 7.79 (d, *J* = 9.5 Hz, 4H), 7.67 (d, *J* = 7.1 Hz, 2H), 7.62 (dd, *J* = 11.6, 4.5 Hz, 1H), 7.49 (td, *J* = 7.1, 3.8 Hz, 3H), 7.42 (t, *J* = 7.3 Hz, 1H), 7.35 (d, *J* = 8.2 Hz, 2H), 7.25 (d, *J* = 8.2 Hz, 2H), 4.90 (d, *J* = 10.9 Hz, 1H), 4.78 (d, *J* = 10.9 Hz, 1H), 1.28 (d, *J* = 2.7 Hz, 9H); <sup>13</sup>C NMR (100MHz, DMSO) δ 162.9, 151.0, 137.5, 136.2, 134.3, 133.1, 133.0, 132.0, 130.5, 129.9, 129.1 (two carbon signals overlapped), 128.8, 128.7, 128.4, 127.4, 126.9, 126.8, 125.6, 125.2, 124.7, 124.3, 123.7, 113.6, 111.7, 75.8, 34.8, 31.6; HRMS (TOF MS Cl<sup>+</sup>) calculated for C<sub>36</sub>H<sub>29</sub>Cl<sub>3</sub>N<sub>2</sub>O<sub>2</sub> [M+H]<sup>+</sup>: 627.1367, found: 627.1363.

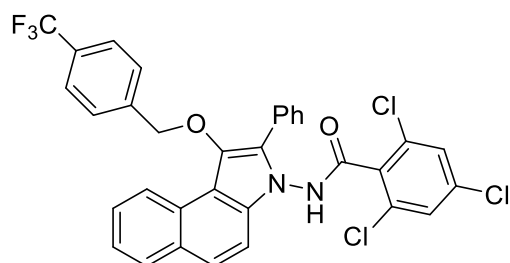

5i

**2,4,6-Trichloro-*N*-{2-phenyl-1-[(4-(trifluoromethyl)benzyl)oxy]-3*H*-benzo[*e*]indol-3-yl}benzamide (5i).** 81.6 mg, 64% yield; White solid, mp = 214.6-216.6 °C; <sup>1</sup>H NMR (400 MHz, DMSO) δ 12.20 (s, 1H), 8.55 (d, *J* = 8.2 Hz, 1H), 8.02 (d, *J* = 8.2 Hz, 1H), 7.77 (dd, *J* = 17.6, 8.9 Hz, 4H), 7.69 – 7.55 (comp, 5H), 7.54 – 7.35 (comp, 6H), 5.09 (d, *J* = 12.0 Hz, 1H), 4.93 (d, *J* = 12.0 Hz, 1H); <sup>13</sup>C NMR (101 MHz, DMSO) δ 163.0, 141.9, 137.0, 136.2, 133.0, 132.9, 132.0, 130.5, 129.9, 129.2, 129.1, 128.9, 128.8, 128.7, 128.5, 128.4, 127.2, 127.0, 126.0, 125.6 (q, *J* = 3.6 Hz), 124.9, 124.3, 123.5, 123.3, 113.4, 111.7, 75.0.; <sup>19</sup>F NMR (376 MHz, DMSO) δ -60.99; HRMS (TOF MS Cl<sup>+</sup>) calculated for C<sub>33</sub>H<sub>20</sub>Cl<sub>3</sub>F<sub>3</sub>N<sub>2</sub>O<sub>2</sub> [M+H]<sup>+</sup>: 639.0615, found: 639.0623.

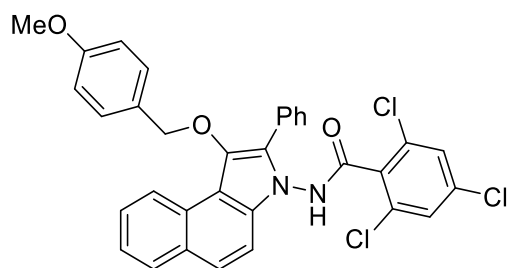

**5j**

**2,4,6-Trichloro-*N*-{1-[(4-methoxybenzyl)oxy]-2-phenyl-3*H*-benzo[*e*]indol-3-yl}benzamide (5j).** 76.8 mg, 64% yield. White solid, mp = 255.8-256.8 °C; <sup>1</sup>H NMR (500 MHz, DMSO) δ 12.19 (s, 1H), 8.64 (d, *J* = 7.6 Hz, 1H), 8.00 (d, *J* = 7.5 Hz, 1H), 7.79 (d, *J* = 19.9 Hz, 4H), 7.67 (d, *J* = 6.4 Hz, 2H), 7.62 (m, 1H), 7.51 (s, 3H), 7.44 (d, *J* = 6.3 Hz, 1H), 7.22 (d, *J* = 7.2 Hz, 2H), 6.88 (d, *J* = 7.3 Hz, 2H), 4.85 (d, *J* = 10.4 Hz, 1H), 4.75 (d, *J* = 10.5 Hz, 1H), 3.74 (s, 3H); <sup>13</sup>C NMR (125 MHz, DMSO) δ 163.0, 159.6, 137.4, 136.2, 133.1, 132.9, 132.0, 130.5, 130.3, 129.9, 129.2, 129.2, 129.1, 128.8, 128.7, 128.4, 128.3, 127.4, 126.9, 124.7, 124.3, 123.7, 114.2, 113.7, 111.7, 75.7, 55.6; HRMS (TOF MS CI<sup>+</sup>) calculated for C<sub>33</sub>H<sub>23</sub>Cl<sub>3</sub>N<sub>2</sub>O<sub>3</sub> [M+H]<sup>+</sup>: 601.0847, found: 601.0853.

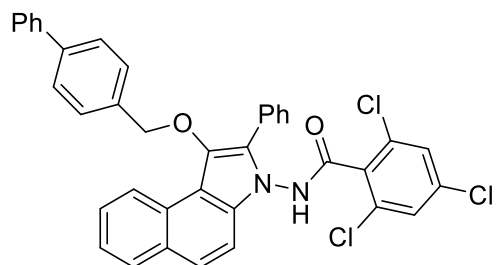

**5k**

***N*-{1-[(1,1'-Biphenyl)-4-ylmethoxy]-2-phenyl-3*H*-benzo[*e*]indol-3-yl}-2,4,6-trichlorobenzamide (5k).** 80.1 mg, 62% yield. White solid, mp = 232.5-234.5 °C; <sup>1</sup>H NMR (400 MHz, DMSO) δ 12.23 (s, 1H), 8.66 (d, *J* = 8.2 Hz, 1H), 8.01 (d, *J* = 7.9 Hz, 1H), 7.79 (s, 2H), 7.70 – 7.59 (comp, 8H), 7.50 – 7.36 (comp, 10H), 4.99 (d, *J* = 11.3 Hz, 1H), 4.87 (d, *J* = 11.3 Hz, 1H); <sup>13</sup>C NMR (125 MHz, DMSO) δ 163.0, 140.4, 140.3, 137.4, 136.4, 136.2, 133.1, 132.9, 132.0, 130.6, 129.9, 129.4, 129.1, 128.8, 128.7, 128.4, 128.0, 127.5, 127.4, 127.2, 127.1, 127.02, 126.97, 126.9, 124.8, 124.3, 123.7, 113.6, 111.7, 75.6; HRMS (TOF MS CI<sup>+</sup>) calculated for C<sub>38</sub>H<sub>25</sub>Cl<sub>3</sub>N<sub>2</sub>O<sub>2</sub> [M+H]<sup>+</sup>: 647.1054. found: 647.1051.

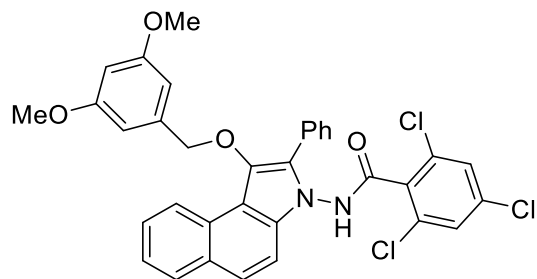

5l

**2,4,6-Trichloro-N-{1-[(3,5-dimethoxybenzyl)oxy]-2-phenyl-3H-benzo[e]indol-3-yl}benzamide (5l).** 79.4 mg, 63% yield. White solid, mp = 231.7-233.5 °C; <sup>1</sup>H NMR (400 MHz, DMSO) δ 12.21 (s, 1H), 8.65 (d, *J* = 8.2 Hz, 1H), 8.01 (d, *J* = 8.0 Hz, 1H), 7.78 (d, *J* = 9.0 Hz, 4H), 7.68 (d, *J* = 7.5 Hz, 2H), 7.64 – 7.60 (m, 1H), 7.51 (t, *J* = 7.5 Hz, 3H), 7.45 – 7.41 (m, 1H), 6.47 (s, 2H), 6.42 (s, 1H), 4.86 (d, *J* = 11.3 Hz, 1H), 4.78 (d, *J* = 11.2 Hz, 1H), 3.68 (s, 6H); <sup>13</sup>C NMR (125 MHz, DMSO) δ 163.0, 160.8, 139.5, 137.4, 136.2, 133.1, 131.9, 130.6, 129.9, 129.1, 128.8, 128.5, 128.1, 127.4, 126.9, 124.8, 124.3, 123.7, 113.6, 111.7, 106.1, 100.4, 75.7, 55.6; HRMS (TOF MS CI<sup>+</sup>) calculated for C<sub>34</sub>H<sub>25</sub>Cl<sub>3</sub>N<sub>2</sub>O<sub>4</sub> [M+H]<sup>+</sup>: 631.0953, found: 631.0956.

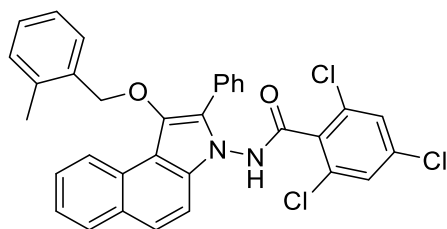

5m

**2,4,6-trichloro-N-(1-((2-methylbenzyl)oxy)-2-phenyl-3H-benzo[e]indol-3-yl)benzamide (5m).** 60.7 mg, 52% yield. White solid, mp = 221.5-223.5 °C; <sup>1</sup>H NMR (500 MHz, DMSO) δ 12.18 (s, 1H), 8.61 (d, *J* = 7.8 Hz, 1H), 8.01 (d, *J* = 7.7 Hz, 1H), 7.77 (s, 4H), 7.60 (dd, *J* = 20.2, 7.0 Hz, 3H), 7.47 (s, 3H), 7.42 (d, *J* = 6.2 Hz, 1H), 7.33 (d, *J* = 5.8 Hz, 1H), 7.20 (t, *J* = 7.5 Hz, 2H), 7.12 (d, *J* = 6.1 Hz, 1H), 4.94 (d, *J* = 11.0 Hz, 1H), 4.83 (d, *J* = 11.0 Hz, 1H), 2.10 (s, 3H); <sup>13</sup>C NMR (125 MHz, DMSO) δ 163.0, 137.5, 136.9, 136.2, 135.4, 133.1, 133.0, 131.8, 130.9, 130.5, 129.9, 129.3, 129.1, 128.8, 128.7, 128.5, 128.4, 127.4, 126.8, 126.3, 124.7, 124.3, 123.6, 113.4, 111.7, 74.2, 18.7; RMS (TOF MS CI<sup>+</sup>) calculated for C<sub>33</sub>H<sub>23</sub>Cl<sub>3</sub>N<sub>2</sub>O<sub>2</sub> [M+H]<sup>+</sup>: 585.0898, found: 585.0883.

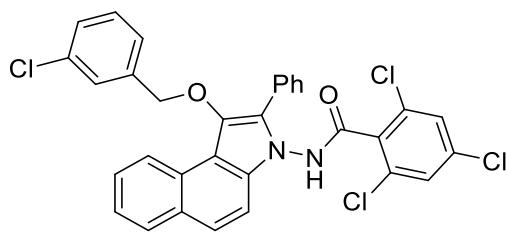

5n

**2,4,6-Trichloro-N-{1-[(3-chlorobenzyl)oxy]-2-phenyl-3H-benzo[e]indol-3-yl}benzamide (5n).** 74.9 mg, 62% yield. White solid, mp = 205.9-208.1 °C; <sup>1</sup>H NMR (400 MHz, DMSO) δ 12.22 (s, 1H), 8.58 (d, *J* = 8.0 Hz, 1H), 8.01 (d, *J* = 7.9 Hz, 1H), 7.78 (s, 4H), 7.62 (dd, *J* = 15.2, 7.7 Hz, 3H), 7.49 (t, *J* = 7.3 Hz, 3H), 7.44 – 7.40 (comp, 1H), 7.36 – 7.29 (comp, 3H), 7.26 (d, *J* = 5.1 Hz, 1H), 4.98 (d, *J* = 11.6 Hz, 1H), 4.85 (d, *J* = 11.5 Hz, 1H); <sup>13</sup>C NMR (100 MHz, DMSO) δ 163.0, 139.7, 137.2, 136.2, 133.5, 133.1, 132.9, 131.9, 130.6, 130.6, 129.9, 129.1, 129.0, 128.8, 128.7, 128.5, 128.4, 128.2, 127.3, 127.0, 126.9, 124.8, 124.3, 123.6, 113.47, 111.7, 75.1; HRMS (TOF MS CI<sup>+</sup>) calculated for C<sub>32</sub>H<sub>20</sub>Cl<sub>4</sub>N<sub>2</sub>O<sub>4</sub> [M+H]<sup>+</sup>: 605.0352, found: 605.0359.

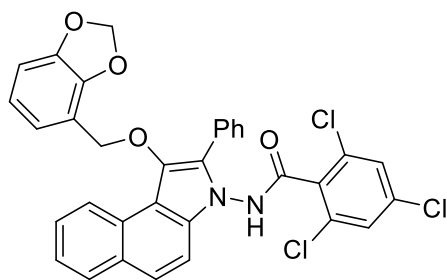

5o

**N-[1-(Benzo[d][1,3]dioxol-4-ylmethoxy)-2-phenyl-3H-benzo[e]indol-3-yl]-2,4,6-trichlorobenzamide (5o).** 79.8 mg, 65% yield. White solid, mp = 150.2-152.2 °C; <sup>1</sup>H NMR (400 MHz, DMSO) δ 12.19 (s, 1H), 8.69 (d, *J* = 7.8 Hz, 1H), 7.99 (d, *J* = 7.6 Hz, 1H), 7.87 – 7.71 (comp, 3H), 7.67 – 7.59 (comp, 3H), 7.54 – 7.44 (comp, 4H), 7.41 (t, *J* = 7.3 Hz, 1H), 6.85 (d, *J* = 7.4 Hz, 1H), 6.75 (t, *J* = 7.3 Hz, 1H), 6.67 (d, *J* = 7.5 Hz, 1H), 5.98 (d, *J* = 6.1 Hz, 2H), 4.89 (d, *J* = 10.9 Hz, 1H), 4.79 (d, *J* = 10.9 Hz, 1H); <sup>13</sup>C NMR (100 MHz, DMSO) δ 162.9, 147.5, 146.3, 137.1, 136.2, 133.0, 132.9, 131.9, 130.5, 129.9, 129.0, 128.8, 128.7, 128.5, 128.3, 127.3, 126.8, 124.7, 124.3, 123.9, 123.1, 121.8, 118.3, 113.7, 111.7, 109.1, 101.4, 70.1, 55.4; HRMS (TOF MS CI<sup>+</sup>) calculated for C<sub>33</sub>H<sub>21</sub>Cl<sub>3</sub>N<sub>2</sub>O<sub>4</sub> [M+H]<sup>+</sup>: 615.0640, found: 615.0637.

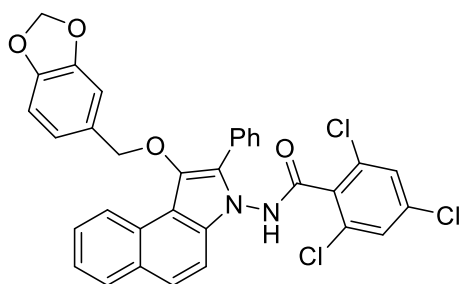

5p

***N*-[1-(Benzo[d][1,3]dioxol-5-ylmethoxy)-2-phenyl-3*H*-benzo[*e*]indol-3-yl]-2,4,6-trichlorobenzamide (5p).** 92.1 mg, 75% yield. White solid, mp = 172.3-175.1 °C; <sup>1</sup>H NMR (400 MHz, DMSO) δ 12.19 (s, 1H), 8.61 (d, *J* = 8.2 Hz, 1H), 8.00 (d, *J* = 8.0 Hz, 1H), 7.87 – 7.73 (comp, 4H), 7.63 (d, *J* = 7.1 Hz, 3H), 7.49 (t, *J* = 6.6 Hz, 3H), 7.42 (t, *J* = 7.2 Hz, 1H), 6.82 (d, *J* = 7.8 Hz, 1H), 6.77 (s, 1H), 6.72 (d, *J* = 7.8 Hz, 1H), 5.99 (d, *J* = 3.4 Hz, 2H), 4.84 (d, *J* = 10.9 Hz, 1H), 4.71 (d, *J* = 10.9 Hz, 1H); <sup>13</sup>C NMR (100 MHz, DMSO) δ 162.9, 147.7, 147.6, 137.2, 136.2, 133.0, 132.9, 132.0, 130.9, 130.6, 129.9, 129.1, 129.1, 128.8, 128.7, 128.5, 128.4, 127.3, 126.9, 124.7, 124.3, 123.7, 122.5, 113.6, 111.68, 109.2, 108.4, 101.5, 75.8; HRMS (TOF MS CI<sup>+</sup>) calculated for C<sub>33</sub>H<sub>21</sub>Cl<sub>3</sub>N<sub>2</sub>O<sub>4</sub> [M+H]<sup>+</sup>: 615.0640, found: 615.0641.

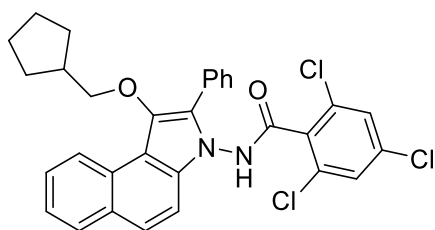

5q

**2,4,6-Trichloro-*N*-[(cyclopentylmethoxy)-2-phenyl-3*H*-benzo[*e*]indol-3-yl]enzamide (5q).** 51.4 mg, 45% yield. White solid, mp = 238.1-240.5 °C; <sup>1</sup>H NMR (400 MHz, DMSO) δ 12.15 (s, 1H), 8.60 (d, *J* = 8.2 Hz, 1H), 7.99 (d, *J* = 8.1 Hz, 1H), 7.87 – 7.70 (comp, 4H), 7.63 (t, *J* = 7.3 Hz, 3H), 7.49 (q, *J* = 7.0 Hz, 3H), 7.41 (t, *J* = 7.3 Hz, 1H), 3.78 – 3.71 (m, 1H), 3.63 (t, *J* = 8.1 Hz, 1H), 1.70 – 1.59 (m, 2H), 1.46 (s, 4H), 1.30 – 1.17 (m, 3H); <sup>13</sup>C NMR (125 MHz, DMSO) δ 163.0, 138.0, 136.2, 133.1, 133.0, 131.9, 130.6, 129.8, 129.2, 129.1, 128.8, 128.7, 128.3, 127.9, 127.4, 126.8, 124.6, 124.2, 123.7, 113.5, 111.7, 78.3, 29.4, 25.3; HRMS (TOF MS CI<sup>+</sup>) calculated for C<sub>31</sub>H<sub>25</sub>Cl<sub>3</sub>N<sub>2</sub>O<sub>2</sub> [M+H]<sup>+</sup>: 563.1054, found: 563.1052.

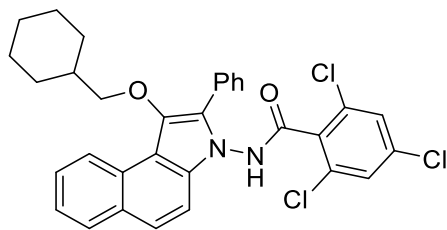

**5r**

**2,4,6-Trichloro-N-[(cyclohexylmethoxy)-2-phenyl-3H-benzo[e]indol-3-yl]benzamide (5r).** 50.6 mg, 45% yield. White solid, mp = 250.2-252.2 °C; <sup>1</sup>H NMR (500 MHz, DMSO) δ 12.16 (s, 1H), 8.59 (d, *J* = 6.7 Hz, 1H), 7.99 (d, *J* = 7.2 Hz, 1H), 7.77 (comp, 4H), 7.64 (t, *J* = 7.3 Hz, 3H), 7.49 (d, *J* = 6.6 Hz, 3H), 7.42 (d, *J* = 6.0 Hz, 1H), 3.71 (s, 1H), 3.58 (s, 1H), 1.74 – 1.56 (m, 6H), 1.15 (d, *J* = 24.5 Hz, 3H), 0.96 (d, *J* = 9.6 Hz, 2H); <sup>13</sup>C NMR (125 MHz, DMSO) δ 162.95, 138.04, 136.1, 131.9, 130.6, 129.8, 129.2, 129.1, 128.8, 128.6, 128.3, 127.9, 127.3, 126.9, 124.6, 124.2, 123.7, 113.5, 111.7, 79.7, 38.1, 29.8, 29.8, 26.4, 25.8; HRMS (TOF MS Cl<sup>+</sup>) calculated for C<sub>32</sub>H<sub>27</sub>Cl<sub>3</sub>N<sub>2</sub>O<sub>2</sub> [M+H]<sup>+</sup>: 577.1211, found: 577.1210.

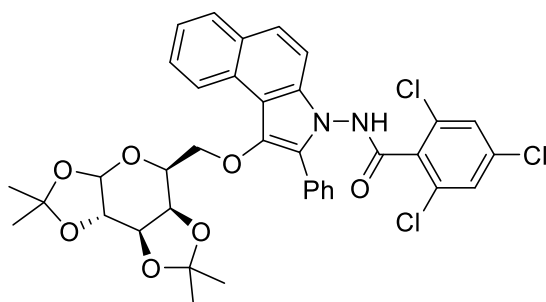

**5s**

**2,4,6-Trichloro-N-{2-phenyl-1-[(5S,5aR,8aR,8bS)-2,2,7,7-tetramethyltetrahydro-5H-bis([1,3]dioxolo)[4,5-b:4',5'-d]pyran-5-yl)methoxy}-3H-benzo[e]indol-3-yl}benzamide (5s).** 90.9 mg, 63% yield. White solid, mp = 242.6-245.3 °C; <sup>1</sup>H NMR (500 MHz, DMSO, 70 °C) δ 11.91 (s, 1H), 8.77 (d, *J* = 8.2 Hz, 1H), 7.95 (d, *J* = 8.0 Hz, 1H), 7.75 – 7.71 (comp, 2H), 7.67 (comp, 4H), 7.56 (m, 1H), 7.46 (q, *J* = 7.0 Hz, 3H), 7.41 (m, 1H), 5.45 (s, 1H), 4.55 (d, *J* = 7.5 Hz, 1H), 4.32 (d, *J* = 2.5 Hz, 1H), 4.23 (d, *J* = 7.7 Hz, 1H), 4.15 – 4.03 (m, 2H), 3.84 (m, 1H), 1.48 – 1.26 (m, 12H); <sup>13</sup>C NMR (125 MHz, DMSO, 70 °C) δ 162.8, 136.1, 133.2, 133.18, 132.1, 130.7, 130.0, 129.4, 128.8, 128.7, 128.6, 128.4, 127.5, 126.6, 124.7, 124.5, 124.2, 113.6, 111.7, 109.1, 108.4,

96.2, 72.8, 72.5, 70.9, 70.8, 70.7, 67.0, 66.6, 26.4, 26.3, 25.4, 25.0; HRMS (TOF MS  $\text{Cl}^+$ ) calculated for  $\text{C}_{37}\text{H}_{33}\text{Cl}_3\text{N}_2\text{O}_7$   $[\text{M}+\text{Na}]^+$ : 745.1246, found: 745.1258.

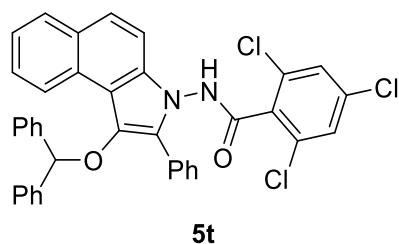

***N*-[1-(Benzhydryloxy)-2-phenyl-3*H*-benzo[*e*]indol-3-yl]-2,4,6-trichlorobenzamide (5t).** 52.9 mg, 41% yield. White solid, mp = 165.9-168.4°C;  $^1\text{H}$  NMR (400 MHz, DMSO)  $\delta$  12.01 (s, 1H), 8.63 (d,  $J = 8.1$  Hz, 1H), 7.99 (d,  $J = 7.6$  Hz, 1H), 7.86 – 7.65 (m, 4H), 7.52-7.50 (m, 1H), 7.49 – 7.44 (m, 1H), 7.38 (t,  $J = 5.3$  Hz, 5H), 7.23-7.20 (m, 5H), 7.17 – 7.08 (m, 5H), 6.02 (s, 1H);  $^{13}\text{C}$  NMR (125 MHz, DMSO)  $\delta$  162.8, 141.5, 141.2, 136.1, 135.5, 133.0, 131.9, 131.1, 129.9, 129.6, 129.1, 128.7, 128.5, 128.4, 128.2, 128.1, 128.0, 127.5, 127.1, 126.7, 124.7, 124.2, 123.8, 113.6, 111.6, 85.3; HRMS (TOF MS  $\text{Cl}^+$ ) calculated for  $\text{C}_{38}\text{H}_{25}\text{Cl}_3\text{N}_2\text{O}_2$   $[\text{M}+\text{Na}]^+$ : 669.0874, found: 669.0881.

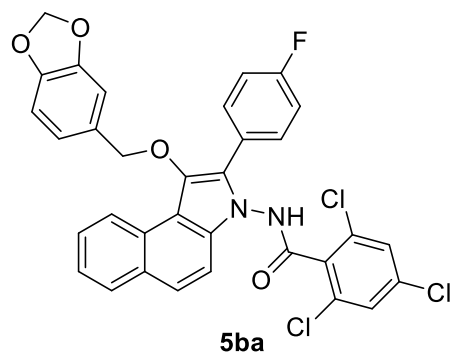

***N*-{1-[Benzo[*d*][1,3]dioxol-5-ylmethoxy]-2-(4-fluorophenyl)-3*H*-benzo[*e*]indol-3-yl}-2,4,6-trichlorobenzamide (5ba).** 74.5 mg, 59% yield. White solid, mp = 224.1-226.3°C;  $^1\text{H}$  NMR (400 MHz, DMSO)  $\delta$  12.27 (s, 1H), 8.61 (d,  $J = 8.1$  Hz, 1H), 8.02 (d,  $J = 8.1$  Hz, 1H), 7.85 – 7.75 (comp, 4H), 7.66 (d,  $J = 1.6$  Hz, 2H), 7.58 (t,  $J = 7.8$  Hz, 2H), 7.53 – 7.48 (m, 1H), 7.41 (t,  $J = 7.8$  Hz, 1H), 6.78 – 6.75 (m, 1H), 6.72 (s, 1H), 6.64 (d,  $J = 7.9$  Hz, 1H), 6.00 (d,  $J = 4.7$  Hz, 2H), 4.91 (d,  $J = 11.0$  Hz, 1H), 4.71 (d,  $J = 11.0$  Hz, 1H);  $^{13}\text{C}$  NMR (125 MHz, DMSO)  $\delta$  163.4, 163.0, 161.5, 147.6, 137.0, 136.2, 133.0, 132.9, 132.8, 132.7, 132.0, 130.8, 129.9, 129.1, 128.8, 127.7, 127.4, 127.0,

125.5, 125.3, 124.8, 124.3, 123.7, 122.7, 115.7, 115.5, 113.6, 111.7, 109.4, 108.3, 101.5, 75.9;  $^{19}\text{F}$  NMR (376 MHz, DMSO)  $\delta$  -113.70; HRMS (TOF MS  $\text{Cl}^+$ ) calculated for  $\text{C}_{33}\text{H}_{20}\text{Cl}_3\text{FN}_2\text{O}_4$   $[\text{M}+\text{H}]^+$ : 633.0545, found: 633.0545.

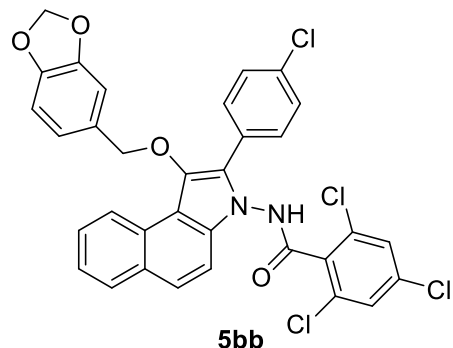

***N***-{1-[Benzo[*d*][1,3]dioxol-5-ylmethoxy]-2-(4-chlorophenyl)-3*H*-benzo[*e*]indol-3-yl}-2,4,6-trichlorobenzamide (**5bb**). 79.1 mg, 61% yield. White solid, mp = 219.1-221.3°C;  $^1\text{H}$  NMR (400 MHz, DMSO)  $\delta$  12.21 (s, 1H), 8.60 (d,  $J$  = 7.6 Hz, 1H), 8.01 (d,  $J$  = 7.1 Hz, 1H), 7.79 (comp, 4H), 7.54 (comp, 6H), 6.82 – 6.71 (comp, 2H), 6.65 (d,  $J$  = 6.5 Hz, 1H), 5.99 (d,  $J$  = 10.2 Hz, 2H), 4.90 (d,  $J$  = 10.4 Hz, 1H), 4.71 (d,  $J$  = 10.2 Hz, 1H);  $^{13}\text{C}$  NMR (100 MHz, DMSO)  $\delta$  162.9, 147.6 (two carbon signals overlapped), 137.2, 136.3, 133.1, 133.0, 132.8, 132.4, 132.1, 130.6, 129.9, 129.2, 128.8, 128.6, 128.0, 127.6, 127.4, 127.0, 125.0, 124.4, 123.7, 122.8, 113.7, 111.7, 109.4, 108.3, 101.5, 76.0; HRMS (TOF MS  $\text{Cl}^+$ ) calculated for  $\text{C}_{33}\text{H}_{20}\text{Cl}_4\text{N}_2\text{O}_4$   $[\text{M}+\text{Na}]^+$ : 671.0069, found: 671.0052.

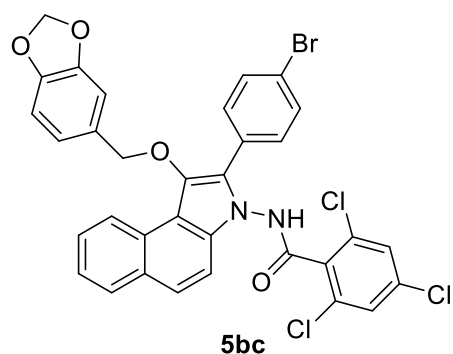

***N***-{1-[Benzo[*d*][1,3]dioxol-5-ylmethoxy]-2-(4-bromophenyl)-3*H*-benzo[*e*]indol-3-yl}-2,4,6-trichlorobenzamide (**5bc**). 80.1 mg, 64% yield. White solid, mp = 223.6-225.8°C;  $^1\text{H}$  NMR (500 MHz, DMSO)  $\delta$  12.23 (s, 1H), 8.63 (d,  $J$  = 8.1 Hz, 1H), 8.01 (d,  $J$  = 7.9 Hz, 1H), 7.85 – 7.76 (comp, 4H), 7.67 (d,  $J$  = 8.0 Hz, 3H), 7.51 (d,  $J$  = 8.2



Hz, 3H), 6.77 (d,  $J = 8.0$  Hz, 2H), 6.65 (d,  $J = 7.8$  Hz, 1H), 6.00 (d,  $J = 11.5$  Hz, 2H), 4.91 (d,  $J = 11.0$  Hz, 1H), 4.73 (d,  $J = 11.0$  Hz, 1H);  $^{13}\text{C}$  NMR (125 MHz, DMSO)  $\delta$  162.9, 147.63, 147.59, 137.2, 136.3, 133.0, 132.8, 132.5, 132.4, 131.5, 130.6, 129.9, 129.2, 128.8, 128.3, 127.7, 127.3, 127.1, 125.1, 124.4, 123.7, 122.8, 121.7, 113.7, 111.7, 109.4, 108.2, 101.5, 76.0; HRMS (TOF MS  $\text{Cl}^+$ ) calculated for  $\text{C}_{33}\text{H}_{20}\text{BrCl}_3\text{N}_2\text{O}_4$  [ $\text{M}-\text{H}$ ] $^-$ : 690.9599, found: 690.9589.

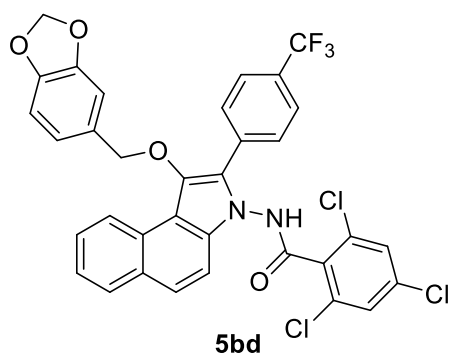

***N***-{1-[Benzo[*d*][1,3]dioxol-5-ylmethoxy]-2-[4-(trifluoromethyl)phenyl]-3*H*-benzo[*e*]indol-3-yl]-2,4,6-trichlorobenzamide (**5bd**). 84.5 mg, 62% yield. White solid, mp = 228.6-230.9°C;  $^1\text{H}$  NMR (400 MHz, DMSO)  $\delta$  12.27 (s, 1H), 8.61 (d,  $J = 8.1$  Hz, 1H), 8.02 (d,  $J = 8.1$  Hz, 1H), 7.85 – 7.75 (comp, 4H), 7.66 (comp, 2H), 7.58 (t,  $J = 7.8$  Hz, 2H), 7.53 – 7.48 (m, 1H), 7.41 (t,  $J = 7.8$  Hz, 1H), 6.76 (dd,  $J = 14.6, 7.9$  Hz, 2H), 6.64 (d,  $J = 7.9$  Hz, 1H), 6.00 (d,  $J = 4.7$  Hz, 2H), 4.91 (d,  $J = 11.0$  Hz, 1H), 4.71 (d,  $J = 11.0$  Hz, 1H);  $^{13}\text{C}$  NMR (125 MHz, DMSO)  $\delta$  162.3, 147.1, 147.0, 137.1, 135.7, 132.6, 132.40, 132.36, 132.1, 130.4, 129.8, 129.4, 128.7, 128.3, 127.1, 126.8, 126.6, 125.4, 124.9, 124.8 (q,  $J = 3.5$  Hz). 124.0, 123.2, 123.1, 122.5, 113.1, 111.2, 109.0, 107.6, 100.9, 75.4.;  $^{19}\text{F}$  NMR (376 MHz, DMSO)  $\delta$  -61.00; HRMS (TOF MS  $\text{Cl}^+$ ) calculated for  $\text{C}_{34}\text{H}_{20}\text{Cl}_3\text{F}_3\text{N}_2\text{O}_4$  [ $\text{M}+\text{H}$ ] $^+$ : 683.0514, found: 683.0529.

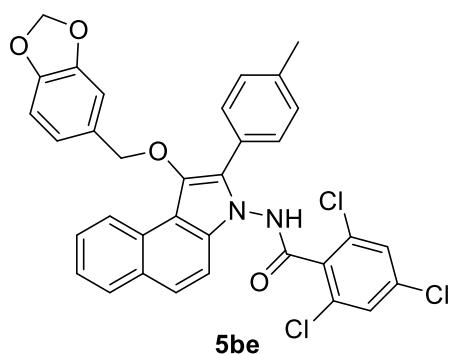

***N***-{1-[Benzo[*d*][1,3]dioxol-5-ylmethoxy]-2-(*p*-tolyl)-3*H*-benzo[*e*]indol-3-yl}-2,4,6-trichlorobenzamide (**5be**). 80.4 mg, 64% yield. White solid, mp = 225.5-227.8 °C; <sup>1</sup>H NMR (500 MHz, DMSO) δ 12.18 (s, 1H), 8.66 (d, *J* = 8.1 Hz, 1H), 8.01 (d, *J* = 7.9 Hz, 1H), 7.85 – 7.74 (comp, 4H), 7.65 – 7.61 (m, 1H), 7.57 (d, *J* = 7.5 Hz, 2H), 7.51 – 7.47 (m, 1H), 7.32 (d, *J* = 7.5 Hz, 2H), 6.83 (d, *J* = 10.4 Hz, 2H), 6.76 (d, *J* = 7.6 Hz, 1H), 6.01 (d, *J* = 5.7 Hz, 2H), 4.85 (d, *J* = 10.9 Hz, 1H), 4.76 (d, *J* = 10.9 Hz, 1H), 2.40 (s, 3H); <sup>13</sup>C NMR (125 MHz, DMSO) δ 163.0, 147.7, 147.6, 137.8, 137.0, 136.2, 133.1, 133.0, 131.8, 131.0, 130.5, 129.9, 129.2, 129.1, 128.8, 128.5, 127.4, 126.8, 126.3, 124.5, 124.2, 123.7, 122.5, 113.7, 111.7, 109.2, 108.4, 101.5, 75.7, 21.5; HRMS (TOF MS Cl<sup>+</sup>) calculated for C<sub>34</sub>H<sub>23</sub>Cl<sub>3</sub>N<sub>2</sub>O<sub>4</sub> [M+H]<sup>+</sup>: 629.0796, found: 629.0799.

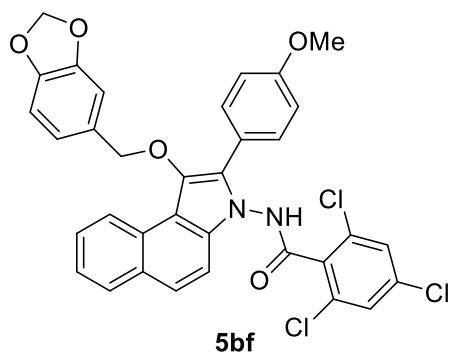

***N***-{1-[Benzo[*d*][1,3]dioxol-5-ylmethoxy]-2-(4-methoxyphenyl)-3*H*-benzo[*e*]indol-3-yl}-2,4,6-trichlorobenzamide (**5bf**). 87.5 mg, 68% yield. White solid, mp = 223.2-225.7 °C; <sup>1</sup>H NMR (400 MHz, DMSO) δ 12.12 (s, 1H), 8.60 (d, *J* = 7.5 Hz, 1H), 7.99 (d, *J* = 8.0 Hz, 1H), 7.99 (d, *J* = 8.0 Hz, 1H), 7.82 (s, 1H), 7.74 (s, 2H), 7.60 (d, *J* = 7.5 Hz, 1H), 7.53 (d, *J* = 7.1 Hz, 2H), 7.47 (t, *J* = 7.5 Hz, 1H), 7.06 (d, *J* = 8.2 Hz, 2H), 6.82 (d, *J* = 7.8 Hz, 1H), 6.79 (s, 1H), 6.73 (d, *J* = 7.8 Hz, 1H), 5.99 (d, *J* = 5.4 Hz, 2H),

4.83 (d,  $J = 10.8$  Hz, 1H), 4.72 (d,  $J = 10.9$  Hz, 1H), 3.82 (s, 3H);  $^{13}\text{C}$  NMR (100 MHz, DMSO)  $\delta$  162.9, 159.7, 147.7, 147.5, 136.7, 136.2, 133.04, 132.98, 132.0, 131.5, 131.1, 129.8, 129.0, 128.8, 128.3, 127.3, 126.8, 124.3, 124.2, 123.7, 122.5, 121.4, 114.2, 113.6, 111.6, 109.2, 108.4, 101.5, 75.7, 55.8; HRMS (TOF MS  $\text{Cl}^+$ ) calculated for  $\text{C}_{34}\text{H}_{23}\text{Cl}_3\text{N}_2\text{O}_5$   $[\text{M}+\text{H}]^+$ : 645.0745, found: 645.0745.

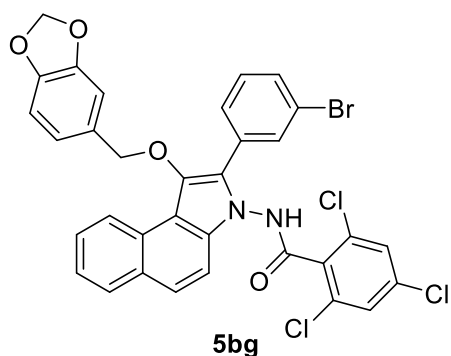

*N*-{1-[Benzo[*d*][1,3]dioxol-5-ylmethoxy]-2-(3-bromophenyl)-3*H*-benzo[*e*]indol-3-yl}-2,4,6-trichlorobenzamide (**5bg**). 75.1 mg, 60% yield. White solid, mp = 149.2–151.0°C;  $^1\text{H}$  NMR (500 MHz, DMSO)  $\delta$  12.27 (s, 1H), 8.62 (d,  $J = 8.1$  Hz, 1H), 8.03 (d,  $J = 7.9$  Hz, 1H), 7.85 – 7.76 (comp, 4H), 7.69 – 7.65 (comp, 2H), 7.60 (comp, 2H), 7.53 – 7.49 (m, 1H), 7.43 (t,  $J = 7.8$  Hz, 1H), 6.77 (d,  $J = 7.8$  Hz, 1H), 6.73 (s, 1H), 6.65 (d,  $J = 7.8$  Hz, 1H), 6.01 (d,  $J = 5.7$  Hz, 2H), 4.92 (d,  $J = 11.0$  Hz, 1H), 4.73 (d,  $J = 11.0$  Hz, 1H);  $^{13}\text{C}$  NMR (125 MHz, DMSO)  $\delta$  163.0, 147.7, 147.6, 137.4, 136.3, 133.0, 132.8, 132.5, 131.2, 130.9, 130.6, 130.5, 129.9, 129.4, 129.2, 128.9, 127.3, 127.1, 125.3, 124.5, 123.6, 122.9, 122.0, 113.6, 111.7, 109.5, 108.2, 101.5, 76.0; HRMS (TOF MS  $\text{Cl}^+$ ) calculated for  $\text{C}_{33}\text{H}_{20}\text{BrCl}_3\text{N}_2\text{O}_4$   $[\text{M}+\text{H}]^+$ : 692.9745, found: 692.9771.

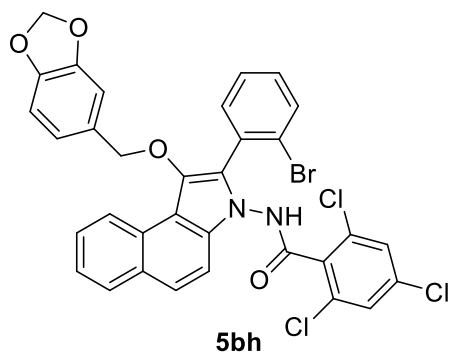

***N*-{1-[Benzo[*d*][1,3]dioxol-5-ylmethoxy]-2-(2-bromophenyl)-3*H*-benzo[*e*]indol-3-yl}-2,4,6-trichlorobenzamide (5bh).** 70.1 mg, 56% yield. White solid, mp = 200.9-202.6°C; <sup>1</sup>H NMR (500 MHz, DMSO) δ 12.20 (s, 1H), 8.64 (d, *J* = 8.2 Hz, 1H), 8.01 (d, *J* = 8.0 Hz, 1H), 7.78 (comp, 3H), 7.65 (t, *J* = 6.9 Hz, 3H), 7.52 – 7.47 (comp, 3H), 7.42 (t, *J* = 7.4 Hz, 1H), 6.82 (d, *J* = 7.9 Hz, 1H), 6.79 (d, *J* = 1.4 Hz, 1H), 6.73 (dd, *J* = 7.9, 1.4 Hz, 1H), 6.00 (dd, *J* = 5.2, 0.8 Hz, 2H), 4.85 (d, *J* = 11.0 Hz, 1H), 4.73 (d, *J* = 10.9 Hz, 1H); <sup>13</sup>C NMR (125 MHz, DMSO) δ 163.0, 147.7, 147.6, 137.2, 136.2, 133.1, 132.9, 132.0, 130.9, 130.6, 129.9, 129.2, 129.1, 128.8, 128.7, 128.5, 128.4, 127.4, 126.9, 124.7, 124.3, 123.7, 122.5, 113.7, 111.7, 109.2, 108.4, 101.5, 75.8; HRMS (TOF MS Cl<sup>+</sup>) calculated for C<sub>33</sub>H<sub>20</sub>BrCl<sub>3</sub>N<sub>2</sub>O<sub>4</sub> [M+H]<sup>+</sup>: 692.9745, found: 692.9771.

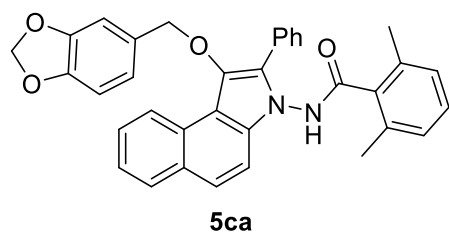

***N*-(1-(Benzo[*d*][1,3]dioxol-5-yloxy)-2-phenyl-3*H*-benzo[*e*]indol-3-yl)-2,6-dimethylbenzamide (5ca).** 57.8 mg, 55% yield. White solid, mp = 213.8-215.5 °C; <sup>1</sup>H NMR (400 MHz, DMSO) δ 11.78 (s, 1H), 8.64 (d, *J* = 8.2 Hz, 1H), 8.02 (d, *J* = 8.0 Hz, 1H), 7.79 (d, *J* = 8.9 Hz, 1H), 7.65 (dd, *J* = 10.8, 8.2 Hz, 4H), 7.50 (comp, 4H), 7.22 (d, *J* = 7.5 Hz, 1H), 7.06 (d, *J* = 7.5 Hz, 2H), 6.83 (comp, 2H), 6.73 (d, *J* = 7.8 Hz, 1H), 6.00 (d, *J* = 5.5 Hz, 2H), 4.89 (d, *J* = 10.9 Hz, 1H), 4.70 (d, *J* = 10.9 Hz, 1H), 2.00 (s, 6H); <sup>13</sup>C NMR (125 MHz, DMSO) δ 168.8, 147.7, 147.6, 137.04, 137.00, 135.4, 135.0, 132.2, 132.1, 131.0, 130.5, 129.8, 129.6, 129.5, 129.1, 128.9, 128.7, 128.5, 128.4, 127.9, 127.5, 126.9, 124.5, 124.2, 123.7, 122.5, 113.60, 113.56, 111.4, 109.2, 108.4, 101.5, 75.9, 21.1, 19.1. HRMS (TOF MS Cl<sup>+</sup>) calculated for C<sub>35</sub>H<sub>28</sub>N<sub>2</sub>O<sub>4</sub> [M+H]<sup>+</sup>: 541.2122, found: 541.2119.

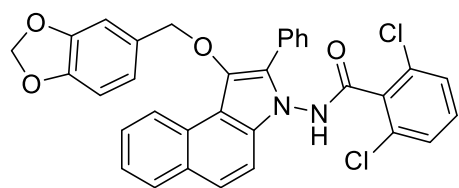

**5cb**

***N*-(1-(Benzo[*d*][1,3]dioxol-5-yloxy)-2-phenyl-3*H*-benzo[*e*]indol-3-yl)-2,6-**

**dichlorobenzamide (5cb).** 72.4 mg, 64% yield. White solid, mp = 215.9-217.5 °C; <sup>1</sup>H NMR (400 MHz, DMSO) δ 12.16 (s, 1H), 8.60 (d, *J* = 7.7 Hz, 1H), 8.00 (d, *J* = 7.6 Hz, 1H), 7.77 (s, 2H), 7.63 (d, *J* = 6.4 Hz, 4H), 7.50 (d, *J* = 6.8 Hz, 5H), 7.42 (d, *J* = 6.4 Hz, 1H), 6.82 (d, *J* = 7.7 Hz, 1H), 6.77 (s, 1H), 6.72 (d, *J* = 7.8 Hz, 1H), 5.99 (s, 2H), 4.83 (d, *J* = 10.9 Hz, 1H), 4.71 (d, *J* = 10.9 Hz, 1H); <sup>13</sup>C NMR (125 MHz, DMSO) δ 167.2, 147.6, 147.6, 137.1, 133.8, 132.7, 132.1, 131.9, 130.9, 130.5, 129.8, 129.1, 129.1, 128.9, 128.6, 128.5, 128.3, 127.3, 126.9, 124.6, 124.3, 123.6, 122.5, 113.5, 111.7, 109.2, 108.4, 101.5, 75.8; HRMS (TOF MS CI<sup>+</sup>) calculated for C<sub>33</sub>H<sub>22</sub>Cl<sub>2</sub>N<sub>2</sub>O<sub>4</sub> [M+H]<sup>+</sup>: 581.1029, found: 581.1034.

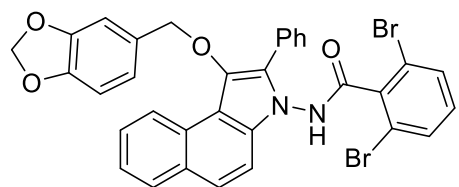

**5cc**

***N*-(1-(Benzo[*d*][1,3]dioxol-5-yloxy)-2-phenyl-3*H*-benzo[*e*]indol-3-yl)-2,6-**

**dibromobenzamide (5cc).** 65.4 mg, 50% yield. White solid, mp = 129.4-131.2 °C; <sup>1</sup>H NMR (400 MHz, DMSO) δ 12.16 (s, 1H), 8.60 (d, *J* = 8.1 Hz, 1H), 7.98 (dd, *J* = 16.1, 8.6 Hz, 2H), 7.76 (t, *J* = 8.1 Hz, 2H), 7.62 (d, *J* = 7.1 Hz, 4H), 7.49 (t, *J* = 7.4 Hz, 3H), 7.40 (t, *J* = 7.4 Hz, 1H), 7.33 (t, *J* = 8.0 Hz, 1H), 6.81 (d, *J* = 7.8 Hz, 1H), 6.74 (s, 1H), 6.70 (d, *J* = 7.8 Hz, 1H), 5.99 (d, *J* = 4.6 Hz, 2H), 4.85 (d, *J* = 10.9 Hz, 1H), 4.66 (d, *J* = 10.9 Hz, 1H); <sup>13</sup>C NMR (125 MHz, DMSO) δ 165.2, 147.6, 147.6, 137.5, 137.1, 133.2, 132.5, 132.2, 130.9, 130.8, 129.8, 129.4, 129.0, 128.8, 128.3, 127.3, 126.8, 124.4, 124.2, 123.6, 122.5, 113.5, 112.44, 109.2, 108.4, 101.4, 75.8; HRMS (TOF MS CI<sup>+</sup>) calculated for C<sub>33</sub>H<sub>22</sub>Br<sub>2</sub>N<sub>2</sub>O<sub>4</sub> [M+H]<sup>+</sup>: 669.0019, found: 668.9896.

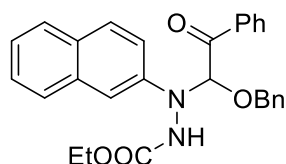

**6a**

**Ethyl 2-(1-(benzyloxy)-2-oxo-2-phenylethyl)-2-(naphthalen-2-yl)hydrazine-1-carboxylate (6a).** 56.3 mg, 62% yield, yellow liquid.  $^1\text{H}$  NMR (400 MHz,  $\text{CDCl}_3$ )  $\delta$  7.82 (s, 2H), 7.66 (t,  $J = 8.2$  Hz, 2H), 7.57 (d,  $J = 7.8$  Hz, 1H), 7.51 – 7.44 (comp, 2H), 7.35 – 7.29 (comp, 6H), 7.25 – 7.15 (comp, 4H), 6.08 (s, 1H), 5.16 – 4.89 (m, 2H), 4.12 (d,  $J = 5.8$  Hz, 2H), 1.24 – 1.16 (m, 3H);  $^{13}\text{C}$  NMR (100 MHz,  $\text{CDCl}_3$ )  $\delta$  194.4, 156.7, 145.3, 136.8, 134.3, 134.0, 133.7, 129.6, 129.5, 129.4, 129.0, 128.72, 128.66, 128.5, 128.3, 127.7, 127.3, 126.7, 124.3, 117.5, 111.3, 71.7, 61.8, 14.7; HRMS (TOF MS  $\text{CI}^+$ ) calculated for  $\text{C}_{28}\text{H}_{26}\text{N}_2\text{O}_4$   $[\text{M}+\text{Na}]^+$ : 477.1785, found: 477.1781.

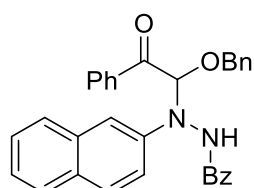

**6b**

***N'*-(1-(benzyloxy)-2-oxo-2-phenylethyl)-*N'*-(naphthalen-2-yl)benzohydrazide (6b).** 70.01 mg, 72% yield. Yellow liquid.  $^1\text{H}$  NMR (500 MHz,  $\text{CDCl}_3$ )  $\delta$  7.83 (d,  $J = 7.0$  Hz, 1H), 7.76 (d,  $J = 7.2$  Hz, 1H), 7.72 (d,  $J = 7.3$  Hz, 1H), 7.63 – 7.59 (comp, 2H), 7.50 (d,  $J = 8.1$  Hz, 1H), 7.44 – 7.38 (comp, 3H), 7.33 (d,  $J = 6.4$  Hz, 3H), 7.28 (d,  $J = 7.7$  Hz, 2H), 7.23 (s, 5H), 7.18 (d,  $J = 10.8$  Hz, 3H), 6.19 (s, 1H), 5.01 (s, 2H);  $^{13}\text{C}$  NMR (125 MHz,  $\text{CDCl}_3$ )  $\delta$  200.3, 166.1, 143.5, 135.4, 133.4, 133.1, 133.0, 132.7, 131.9, 131.0, 128.5, 128.4, 128.3, 128.0, 127.7, 127.6, 127.4, 127.3, 127.2, 126.5, 126.4, 126.0, 125.5, 125.5, 125.3, 123.2, 122.5, 116.6, 114.9, 110.4, 86.6, 70.6; HRMS (TOF MS  $\text{CI}^+$ ) calculated for  $\text{C}_{32}\text{H}_{26}\text{N}_2\text{O}_3$   $[\text{M}+\text{Na}]^+$ : 509.1836, found: 509.1835.

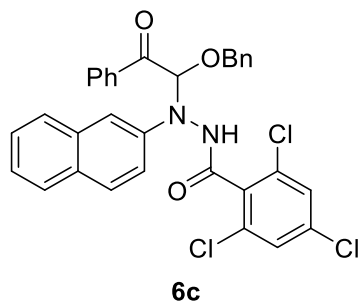

***N'*-(1-(Benzyloxy)-2-oxo-2-phenylethyl)-2,4,6-trichloro-*N'*-(naphthalen-2-yl)benzohydrazide (6c).** 23 mg, 32% yield. Yellow liquid.  $^1\text{H}$  NMR (500 MHz,  $\text{CDCl}_3$ )  $\delta$  7.75 (d,  $J = 7.8$  Hz, 3H), 7.54 (dd,  $J = 18.2, 10.9$  Hz, 4H), 7.34 – 7.29 (m, 5H), 7.24 – 7.17 (m, 5H), 6.70 (s, 2H), 5.00 (s, 1H), 4.90 (s, 2H);  $^{13}\text{C}$  NMR (125 MHz,  $\text{CDCl}_3$ )  $\delta$  190.5, 169.8, 142.2, 136.1, 136.0, 135.6, 134.7, 134.6, 134.0, 133.7, 133.6, 132.7 (two carbon signals overlap), 129.5, 128.9, 128.7, 128.5, 128.2, 127.5, 126.7, 126.4, 126.3, 123.9, 116.5, 116.4, 110.5, 80.6, 71.8. HRMS (TOF MS  $\text{Cl}^+$ ) calculated for  $\text{C}_{32}\text{H}_{23}\text{Cl}_3\text{N}_2\text{O}_3$   $[\text{M}+\text{Na}]^+$ : 611.0666, found: 611.0669.

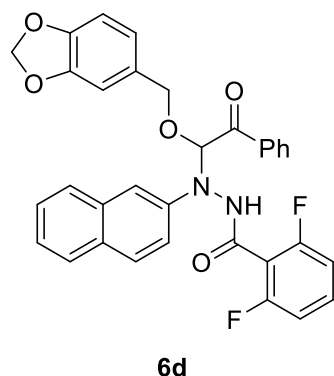

***N'*-(1-(Benzo[*d*][1,3]dioxol-5-ylmethoxy)-2-oxo-2-phenylethyl)-2,6-difluoro-*N'*-(naphthalen-2-yl)benzohydrazide.** 91.7 mg, 81% yield. Yellow liquid.  $^1\text{H}$  NMR (400 MHz,  $\text{CDCl}_3$ )  $\delta$  8.64 (s, 1H), 7.97 (d,  $J = 7.6$  Hz, 2H), 7.80 (comp, 2H), 7.71 (d,  $J = 8.1$  Hz, 1H), 7.61 (comp, 1H), 7.49 – 7.35 (comp, 7H), 7.08 – 6.96 (comp, 4H), 6.85 (m, 1H), 6.30 (s, 1H), 6.00 (d,  $J = 6.7$  Hz, 2H), 5.09 (m, 2H);  $^{13}\text{C}$  NMR (100 MHz,  $\text{CDCl}_3$ )  $\delta$  194.9, 160.4, 160.3 (d,  $J = 252.9$  Hz), 147.9, 147.9, 144.1, 134.4, 134.2, 134.1, 132.3 (d,  $J = 10.1$  Hz), 132.2 (d,  $J = 10.1$  Hz), 130.1, 129.7, 129.5, 129.4, 128.6, 127.5, 127.2, 126.6, 124.4, 123.7, 117.4, 112.1 (d,  $J = 21.0$  Hz),  $\delta$  112.1 (d,  $J = 15.1$  Hz), 111.7, 110.1, 108.3, 101.2, 71.8;  $^{19}\text{F}$  NMR (376 MHz,  $\text{CDCl}_3$ )  $\delta$  -111.01.

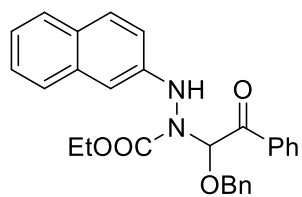

**7a**

**Ethyl 1-(1-(benzyloxy)-2-oxo-2-phenylethyl)-2-(naphthalen-2-yl)hydrazine-1-carboxylate (7a).** 27.2 mg, 30% yield, yellow liquid.  $^1\text{H}$  NMR (400 MHz,  $\text{CDCl}_3$ )  $\delta$  7.93 (d,  $J = 7.3$  Hz, 2H), 7.68 (d,  $J = 7.8$  Hz, 1H), 7.60 (t,  $J = 7.3$  Hz, 2H), 7.44-7.42 (m, 5H), 7.39-7.36 (m, 4H), 7.25 (d,  $J = 7.3$  Hz, 1H), 6.94 (s, 2H), 6.73 (s, 1H), 6.10 (s, 1H), 4.93 (s, 2H), 4.24 (s, 2H), 1.17 (s, 3H);  $^{13}\text{C}$  NMR (100 MHz,  $\text{CDCl}_3$ )  $\delta$  192.3, 157.3, 144.6, 136.7, 135.0, 134.2, 133.6, 129.3, 129.3, 128.9, 128.8, 128.7, 128.6 (two carbon signals overlapped), 128.3, 127.6, 126.6, 126.2, 123.3, 116.2, 108.4, 71.6, 63.3, 14.4; HRMS (TOF MS  $\text{CI}^+$ ) calculated for  $\text{C}_{28}\text{H}_{26}\text{N}_2\text{O}_4$   $[\text{M}+\text{Na}]^+$ : 477.1785, found: 477.1788.



## 5. General Procedure for Scale up

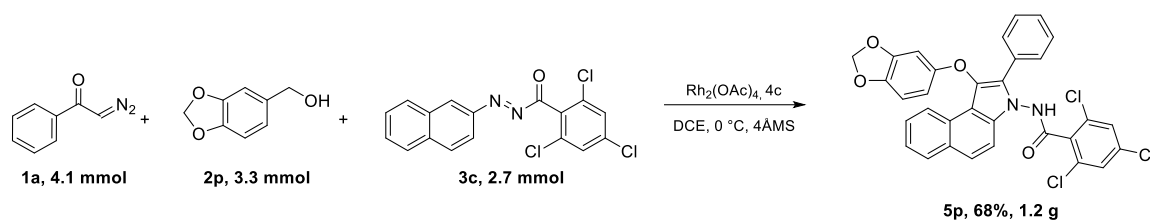

To a 50-mL oven-dried round-bottom flask with a magnetic stirring bar, Azonaphthalenes compounds **3c** (0.991 g, 2.7 mmol), Piperonyl alcohol **2p** (0.502 g, 3.3 mmol),  $\text{Rh}_2(\text{OAc})_4$  (11.9 mg, 1.0 mol%), **4c** (85.92 mg, 5.0 mol%), 4 Å molecular sieves (1.35 g) and anhydrous DCE (15.0 mL) were added in sequence under atmosphere of argon, the mixture was stirred at 0 °C for 10 minutes. **1a** (0.589 g, 4.1 mmol) in anhydrous DCE (15.0 mL) was then added to the above mixture via a syringe pump for 1.0 h at 0 °C under argon atmosphere. When reaction was completed (monitored by TLC), the crude reaction mixture was evaporated in *vacuo* after filtration. The residue was purified by flash column chromatography on silica gel (Hexanes: EtOAc:  $\text{CH}_2\text{Cl}_2$  = 15:1:1 to 5:1:1) to give the pure product **5p** 68% yield (1.20 g) as yellow solid.

## 6. Control Experiment :

Control reaction (a):

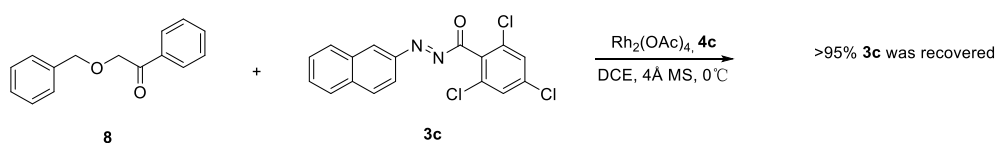

To a 10-mL oven-dried vial with a magnetic stirring bar, compound **8** (0.12 mmol), Azonaphthalenes compound **3c** (0.10 mmol),  $\text{Rh}_2(\text{OAc})_4$  (2.5 mol%), 4 Å molecular sieves (100 mg) and anhydrous DCE (1 mL) were added in sequence under atmosphere of argon, the mixture was stirred at 0 °C for 1 hour. The crude reaction mixture was then evaporated in *vacuo* after filtration. Crude NMR showed more than 95% of starting material **3c** remained (1,3,5-trimethoxybenzene (0.10 mmol) was used as the internal standard), after flash column chromatography on silica gel (Hexanes: EtOAc = 50:1 to

20:1), > 95% of **3c** was recovered. (Figure S1).

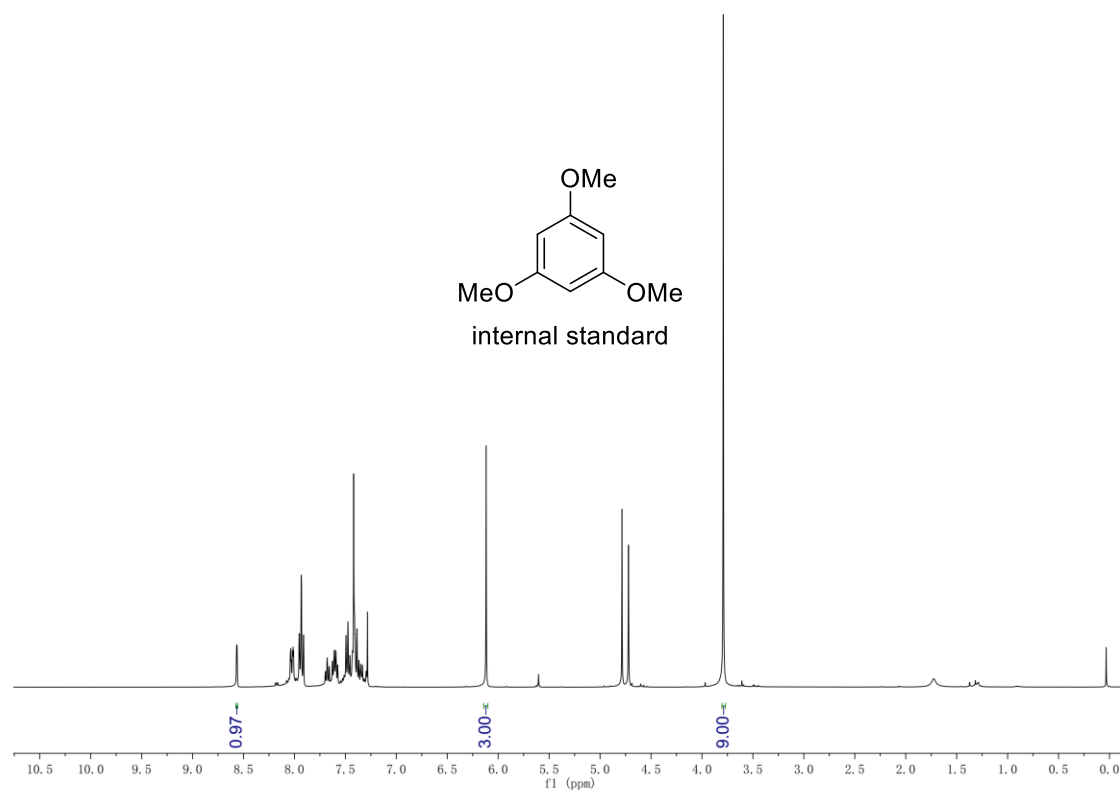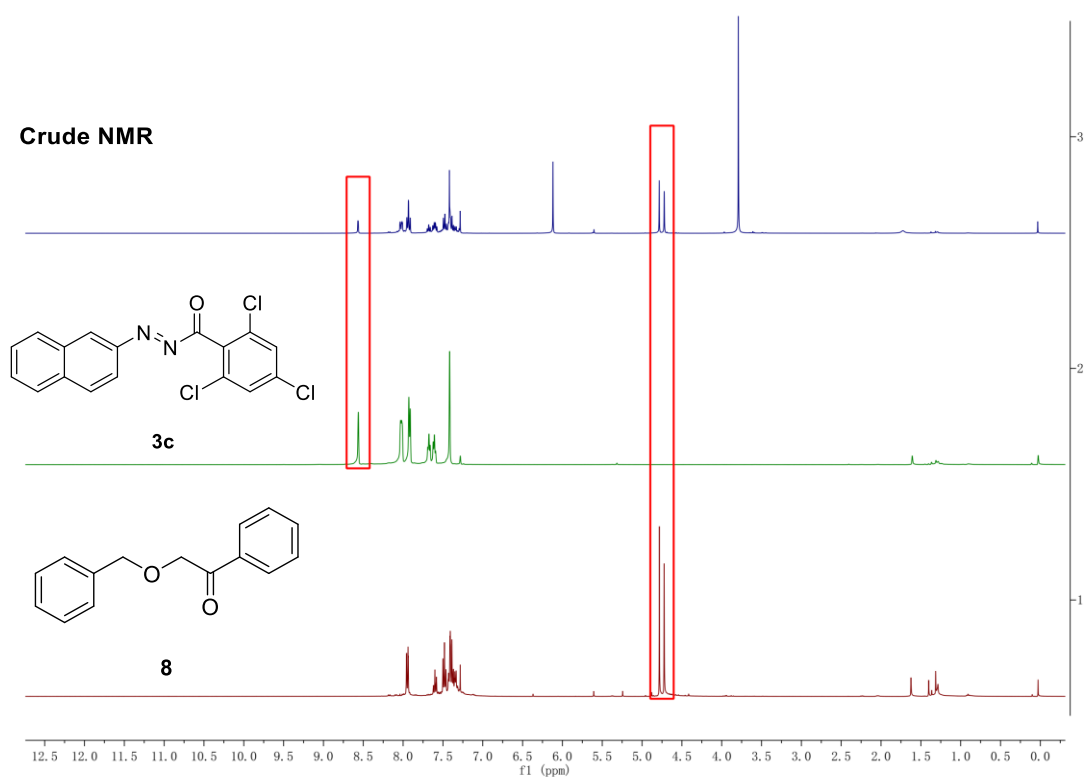

**Figure S1**

Control reaction (b):

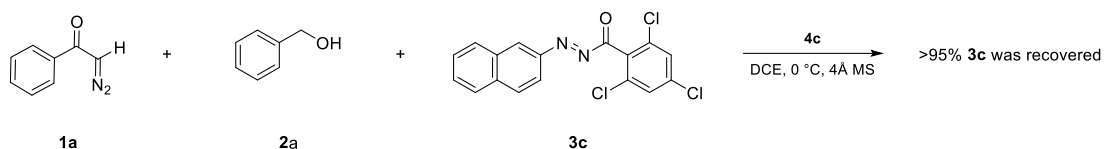

To a 10-mL oven-dried vial with a magnetic stirring bar, Benzyl alcohol **2a** (0.12 mmol), Azonaphthalenes compound **3c** (0.10 mmol), **4c** (5.0 mol%), 4 Å molecular sieves (100 mg) and anhydrous DCE (1 mL) were added in sequence under atmosphere of argon, the mixture was stirred at 0 °C for 10 minutes, and **1a** (0.15 mmol) in anhydrous DCE (1 mL) were added to the above mixture via a syringe pump for 1 h at 0 °C under argon atmosphere. The crude reaction mixture was evaporated in *vacuo* after filtration. Crude NMR showed more than 95% of starting material **3c** remained (1,3,5-trimethoxybenzene (0.10 mmol) was used as the internal standard), after flash column chromatography on silica gel (Hexanes: EtOAc = 50:1 to 20:1), > 95% of **3c** was recovered.( Figure S2).

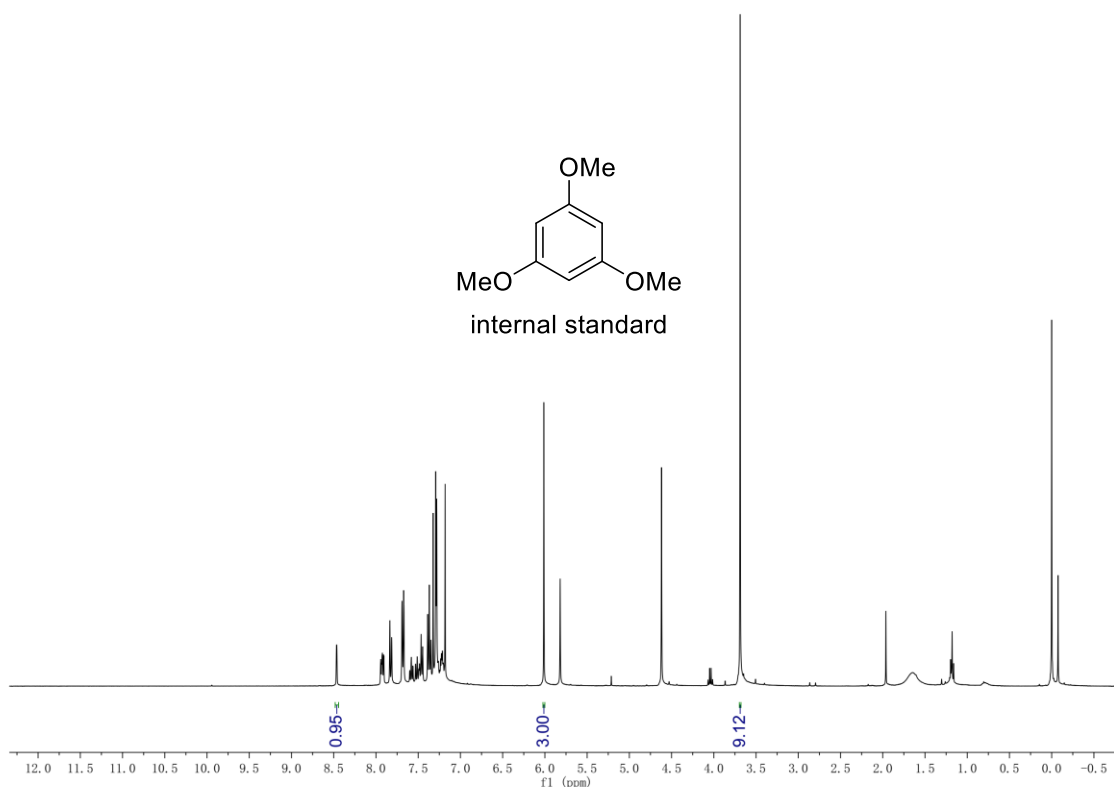

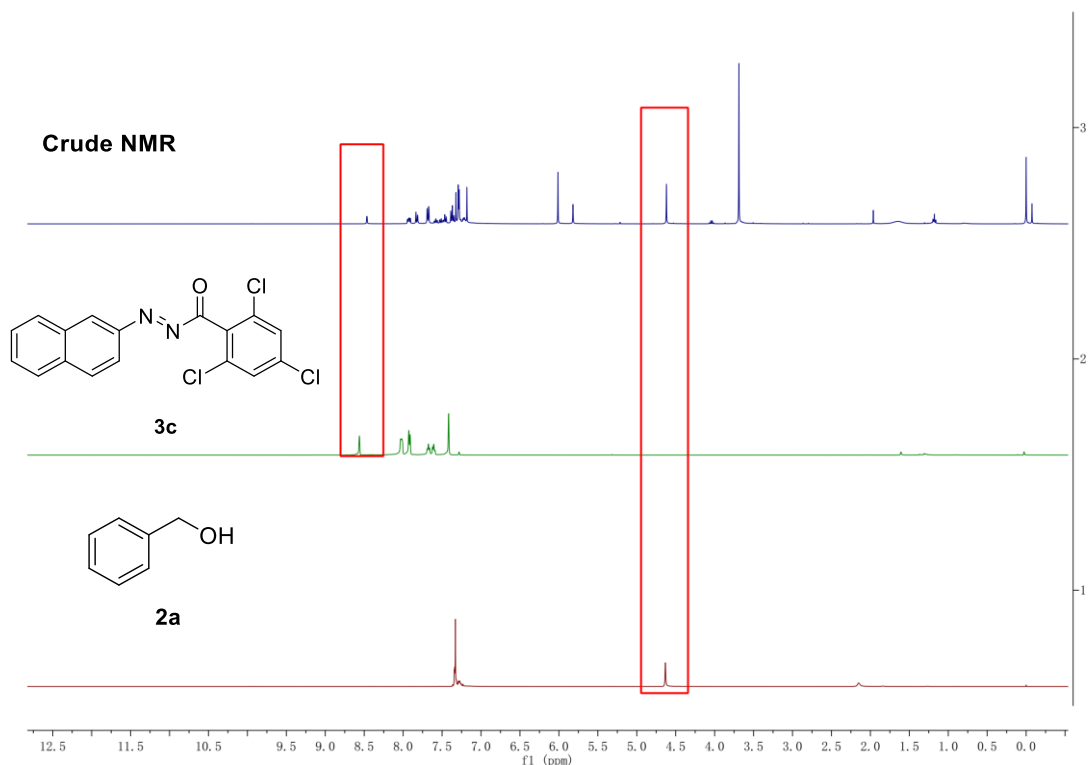

**Figure S2**

Control reaction (c):

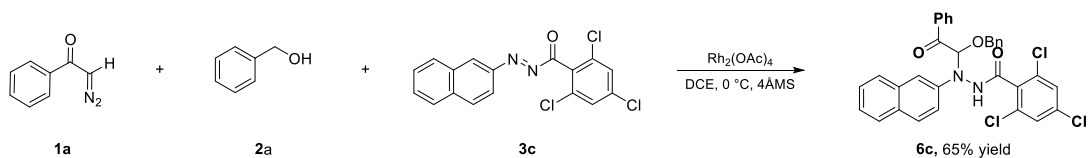

To a 10-mL oven-dried vial with a magnetic stirring bar, Benzyl alcohol **2a** (13.0 mg, 0.12 mmol), Azonaphthalenes compound **3c** (36.3 mg, 0.1 mmol),  $\text{Rh}_2(\text{OAc})_4$  (1.1 mg, 2.5 mol%), 4Å molecular sieves (100 mg) and anhydrous DCE (1 mL) were added in sequence under atmosphere of argon, the mixture was stirred at 0 °C for 10 minutes, and **1a** (21.9 mg, 0.15 mmol) in anhydrous DCE (1 mL) were added to the above mixture via a syringe pump for 1 h at 0 °C under argon atmosphere. The crude reaction mixture was evaporated in *vacuo* after filtration and the residue was purified by flash column chromatography on silica gel (Hexanes : EtOAc = 20:1 to 15:1) to give the pure product **6c** in 65% yield (38.23 mg).

## 7. Reference:

- [1] B. S. Kale, H. Fu. Lee, R. S. Liu, *Adv. Synth. Catal.* **2017**, 359, 402 – 409.
- [2] L. W. Qi, J. H. Mao, J. Zhang, B. Tan, *Nat. Chem.* **2018**, 10, 58-64.
- [3] D. Uraguchi, M. Terada, *J. Am. Chem. Soc.* **2004**, 126, 5356-5357.

## 8. NMR Spectra for Compounds 3, 5, 6, 7

TXR 3-Cl

8.54  
8.01  
8.00  
7.91  
7.89  
7.67  
7.65  
7.64  
7.60  
7.58  
7.57  
7.39

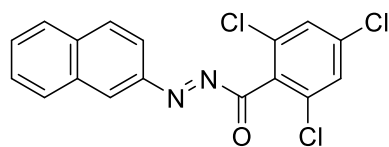

3c

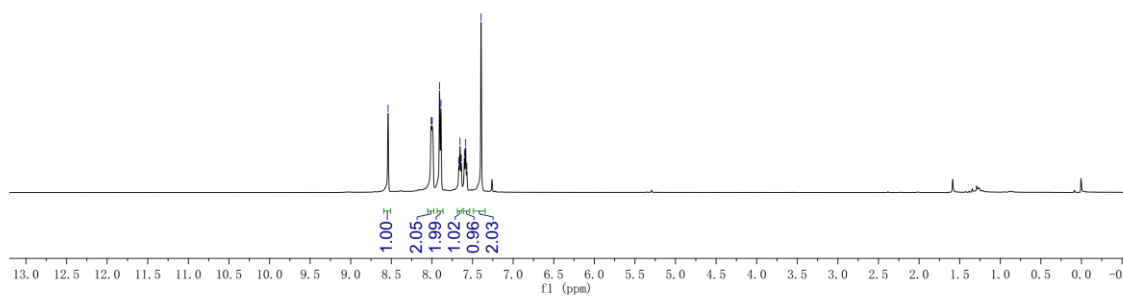

TXR 3-Cl

179.19

149.57

136.78

136.50

134.68

133.11

132.94

130.27

129.88

129.76

128.19

127.95

127.46

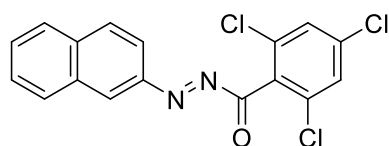

3c

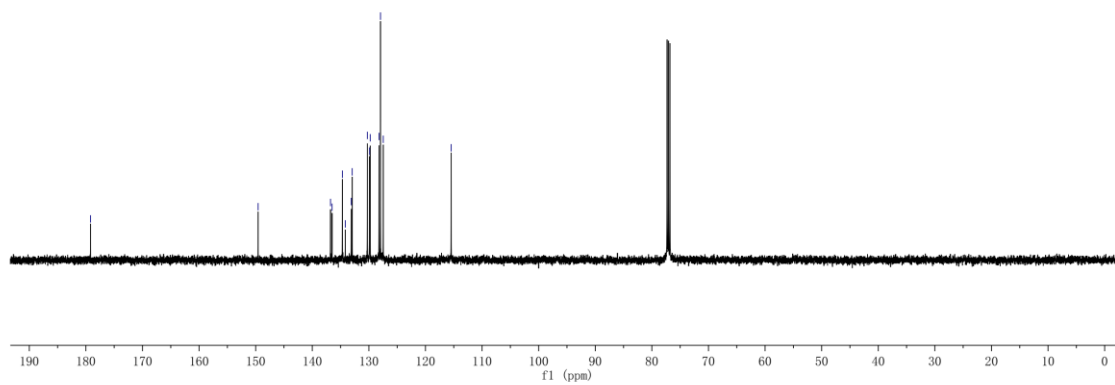

YXR 2-ME

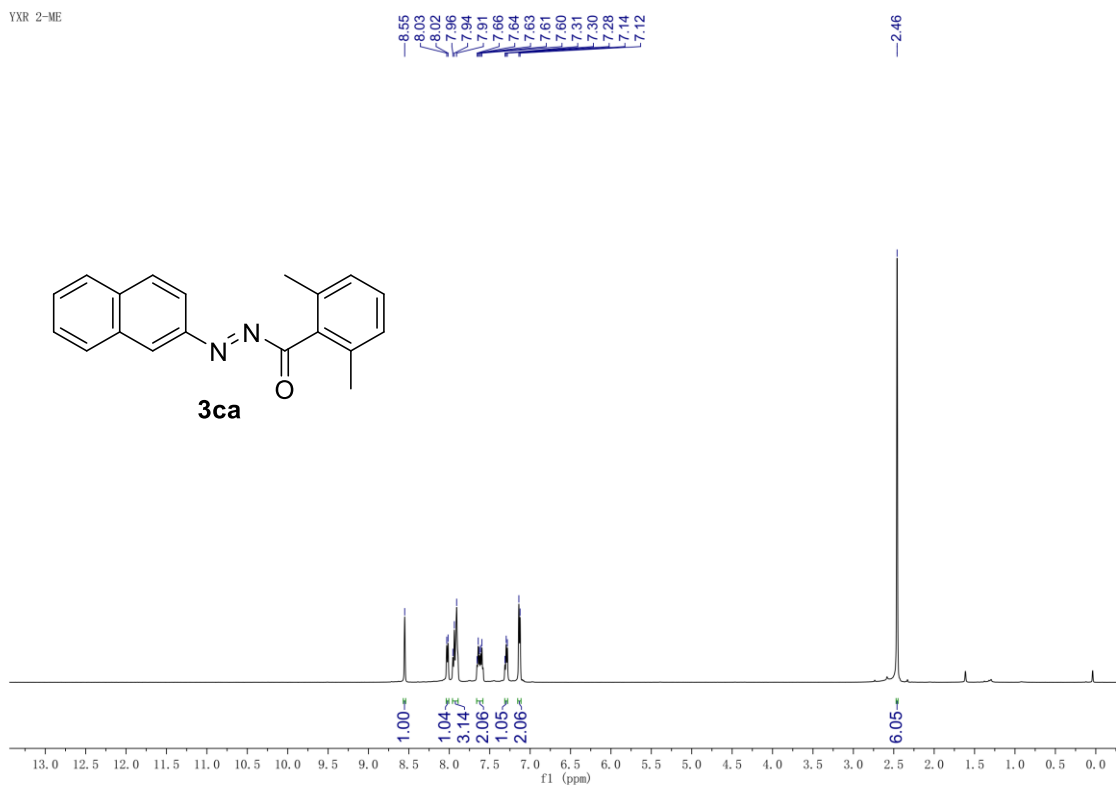

YXR 2-ME

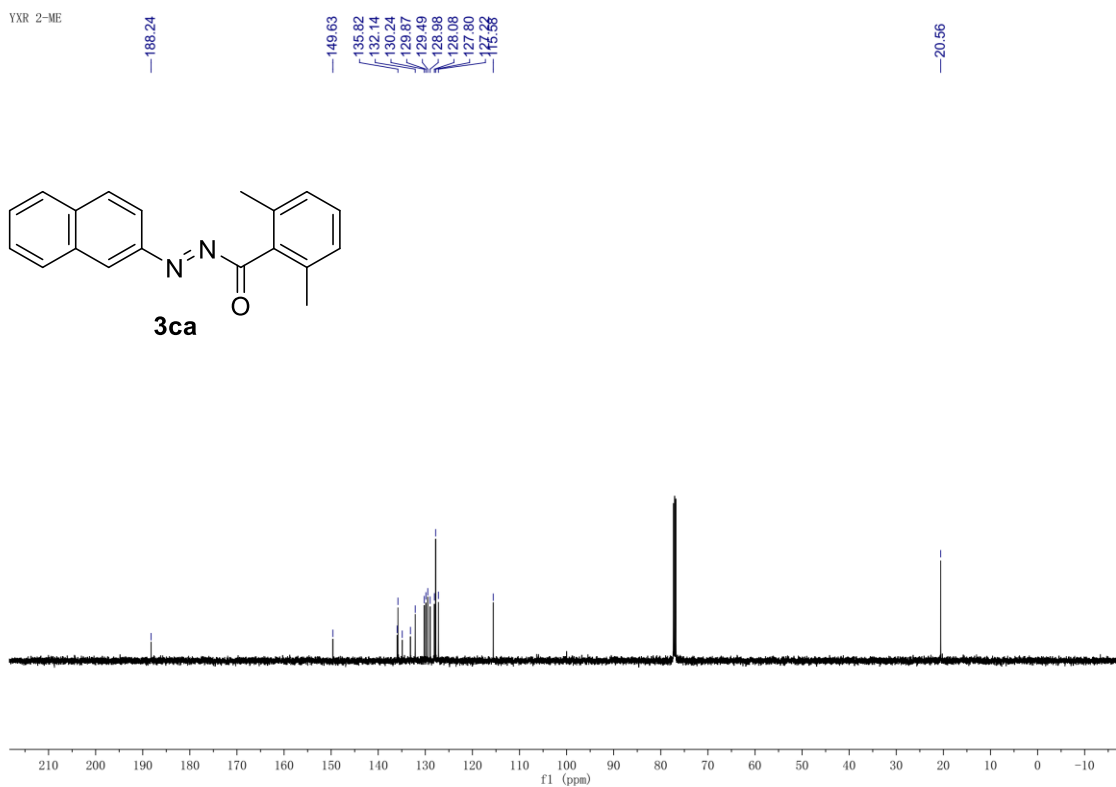

YXR 2-CL

8.56  
8.04  
8.02  
8.01  
7.93  
7.91  
7.68  
7.67  
7.65  
7.61  
7.60  
7.58  
7.39

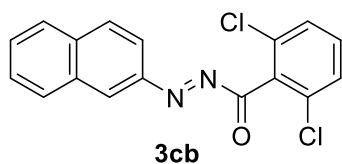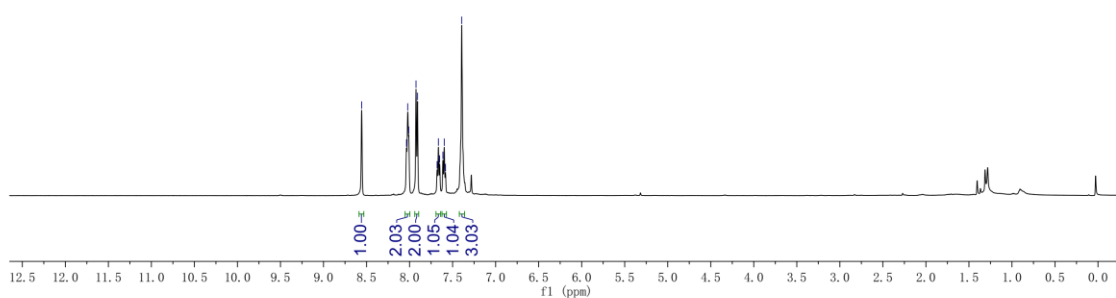

YXR 2-CL

179.95

149.61

136.66  
134.26  
132.25  
131.30  
130.20  
129.68  
128.17  
127.78  
116.83

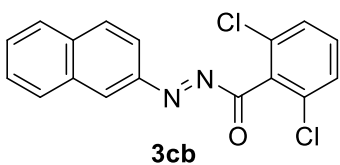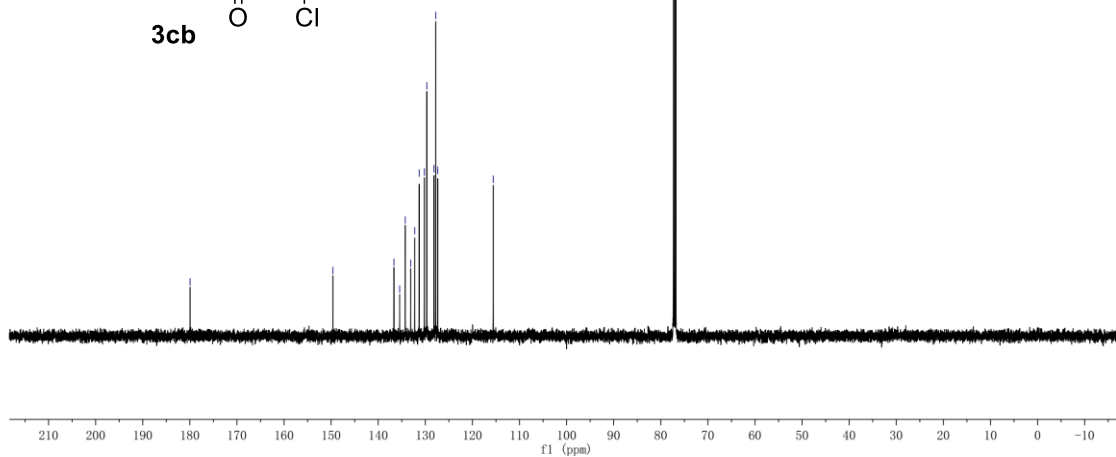



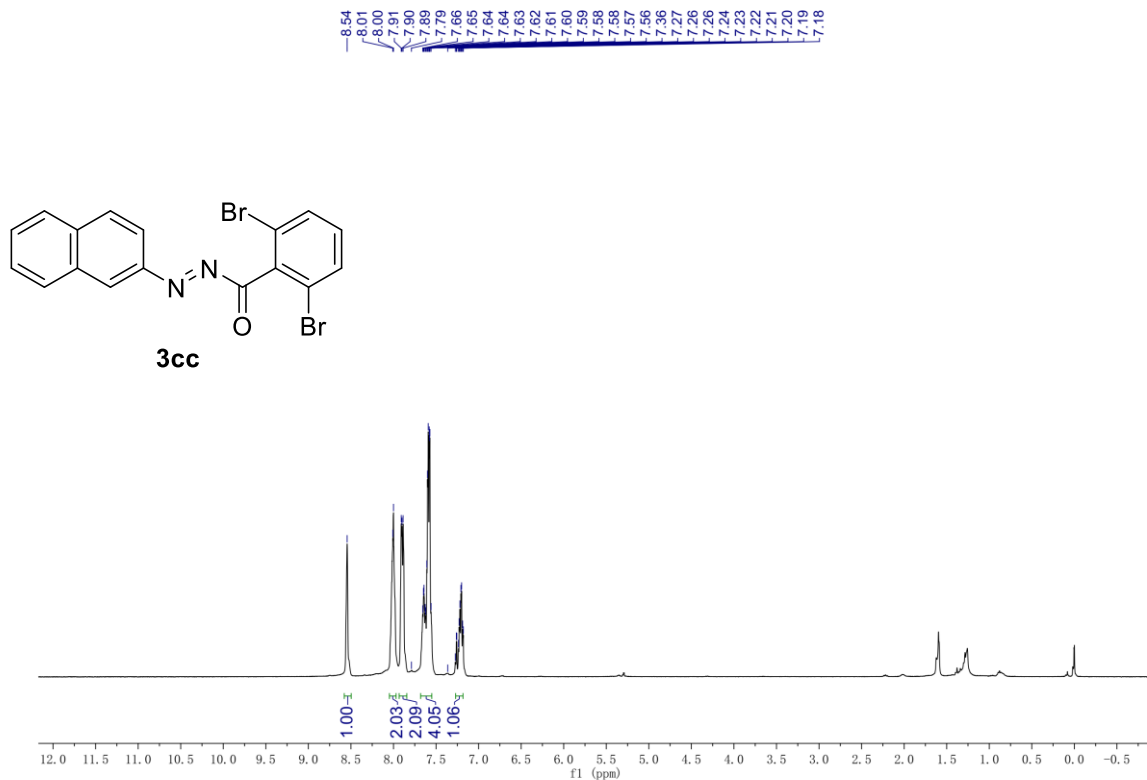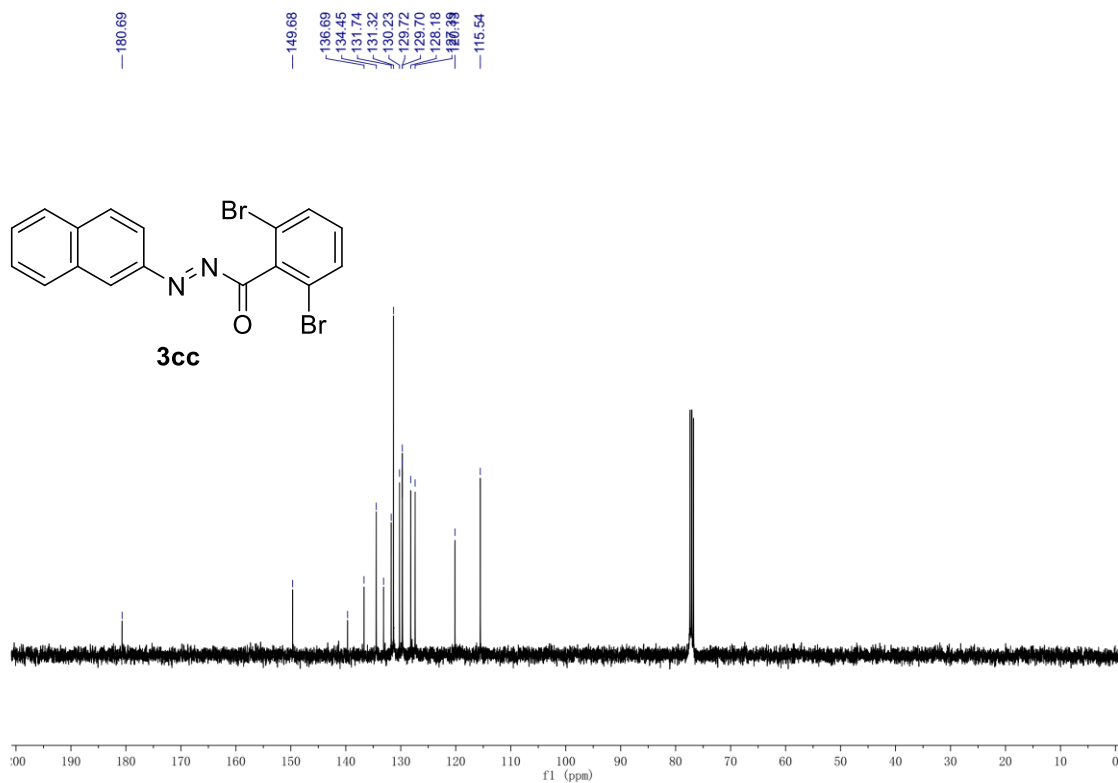

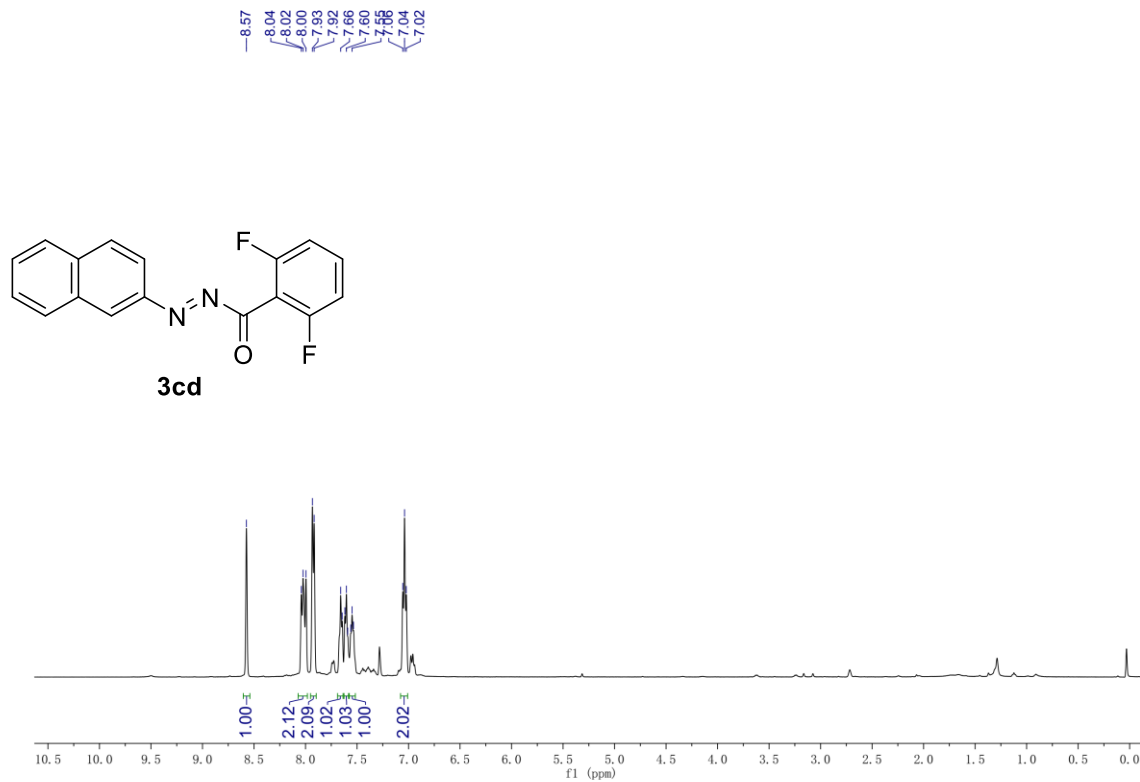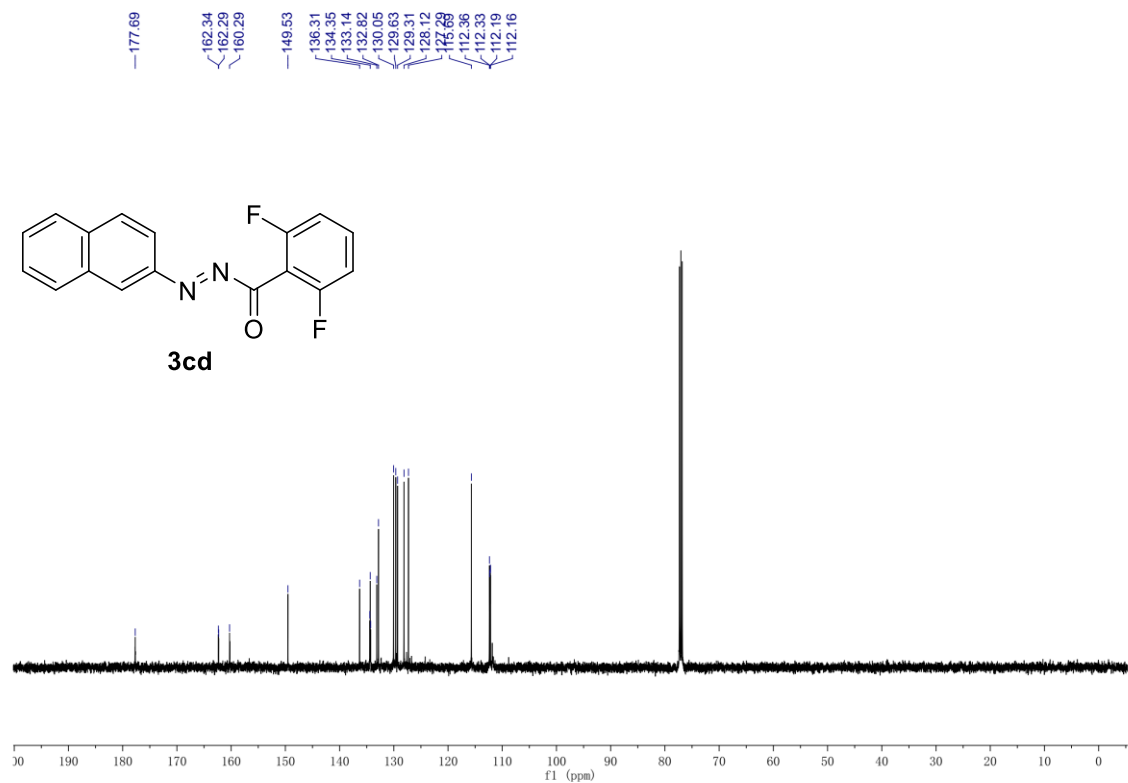

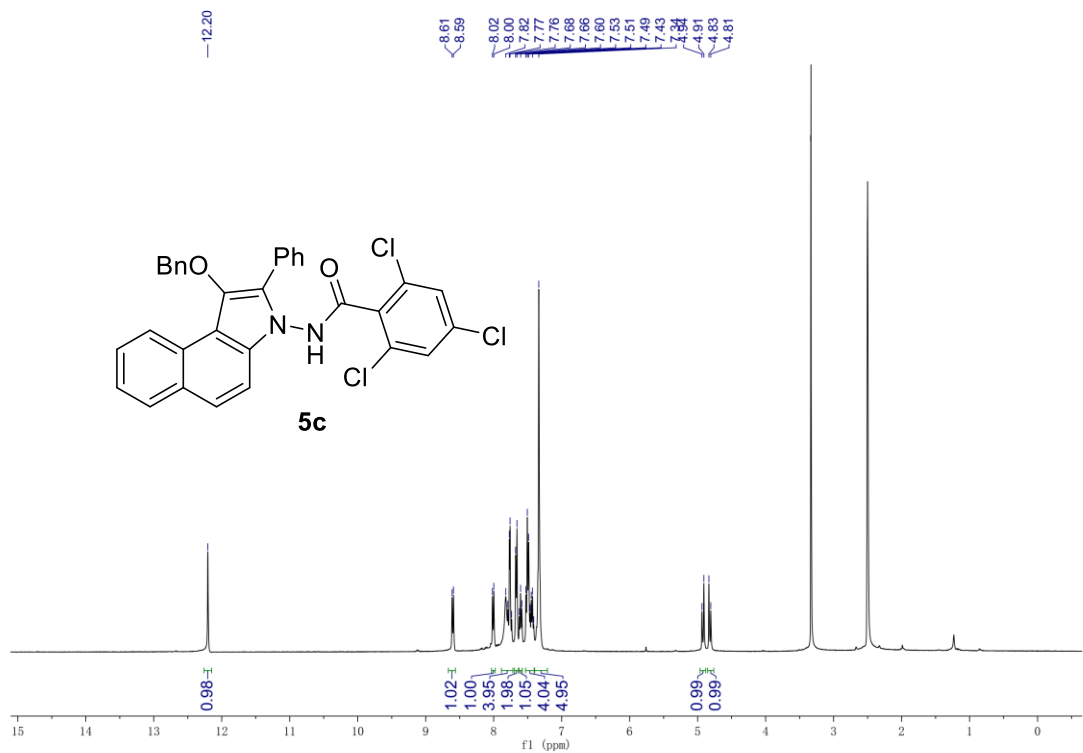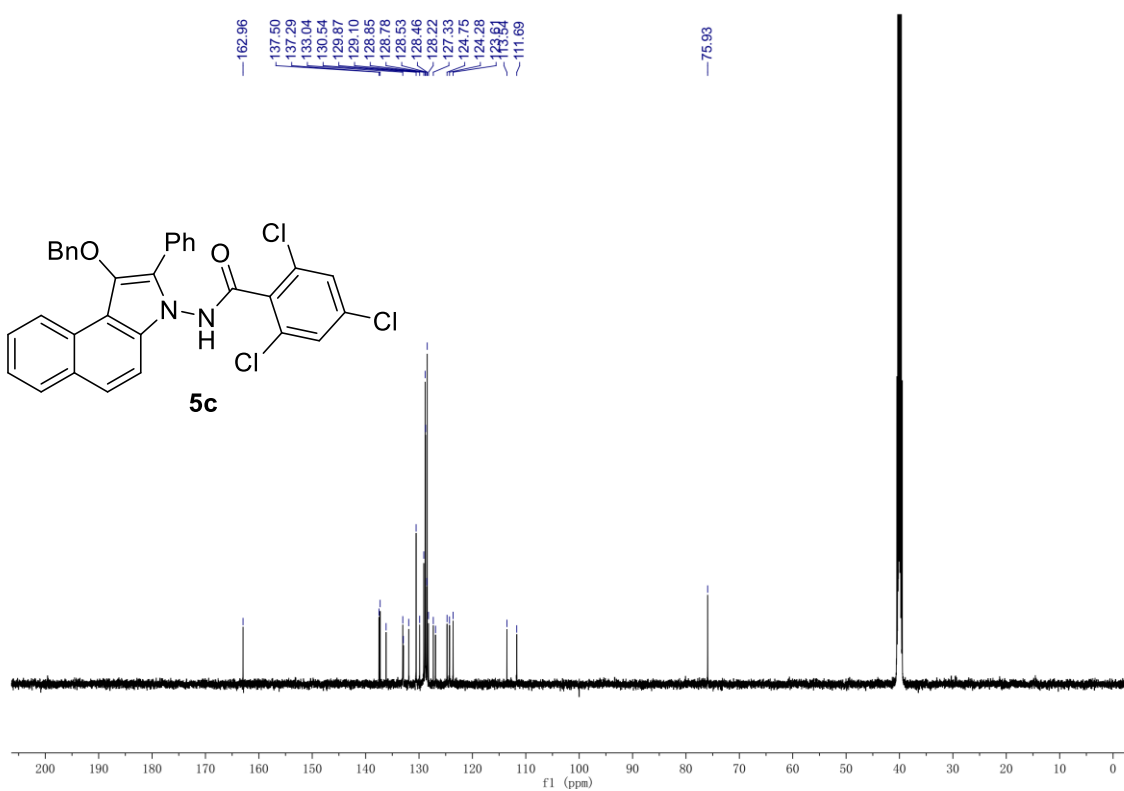

Quantitative  $^{13}\text{C}$  spectrum for compound **5c**:

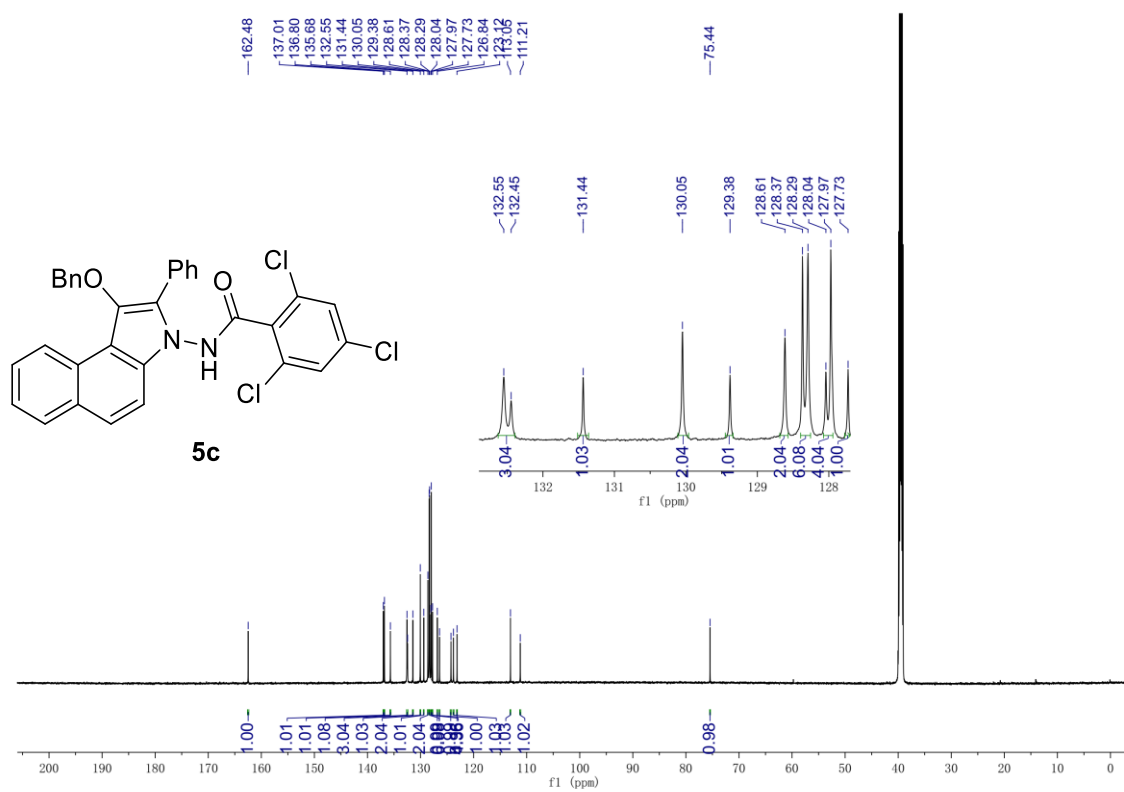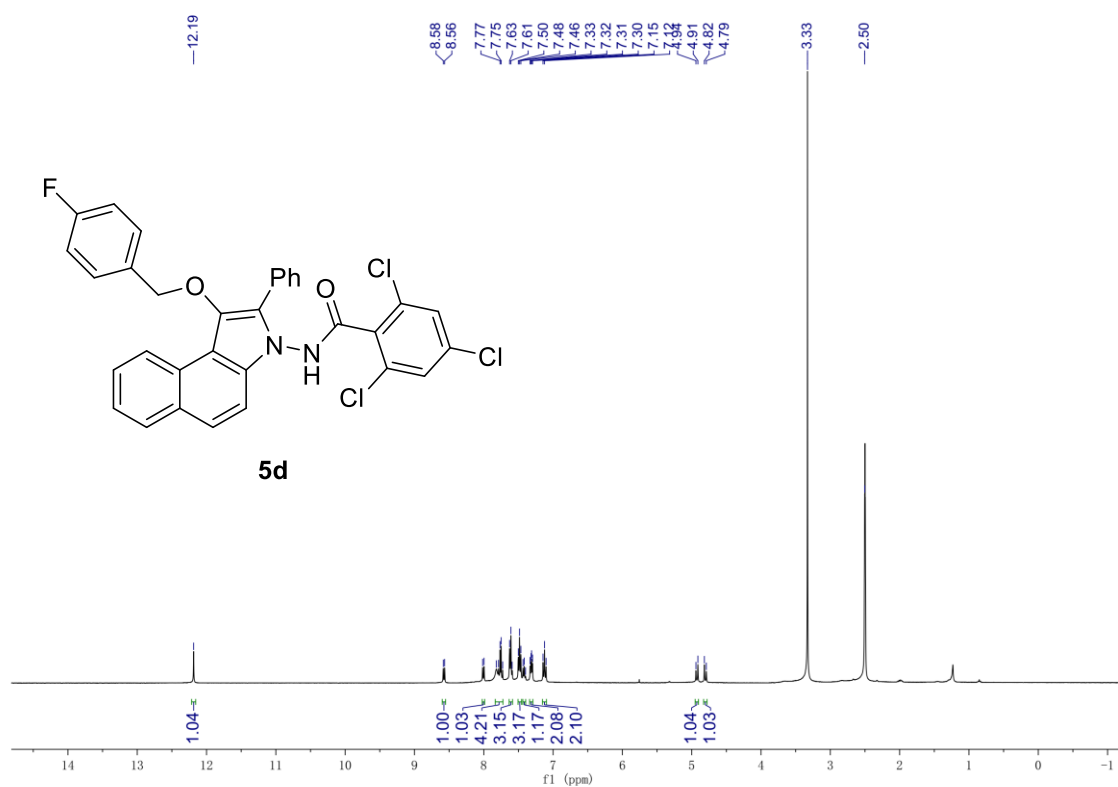

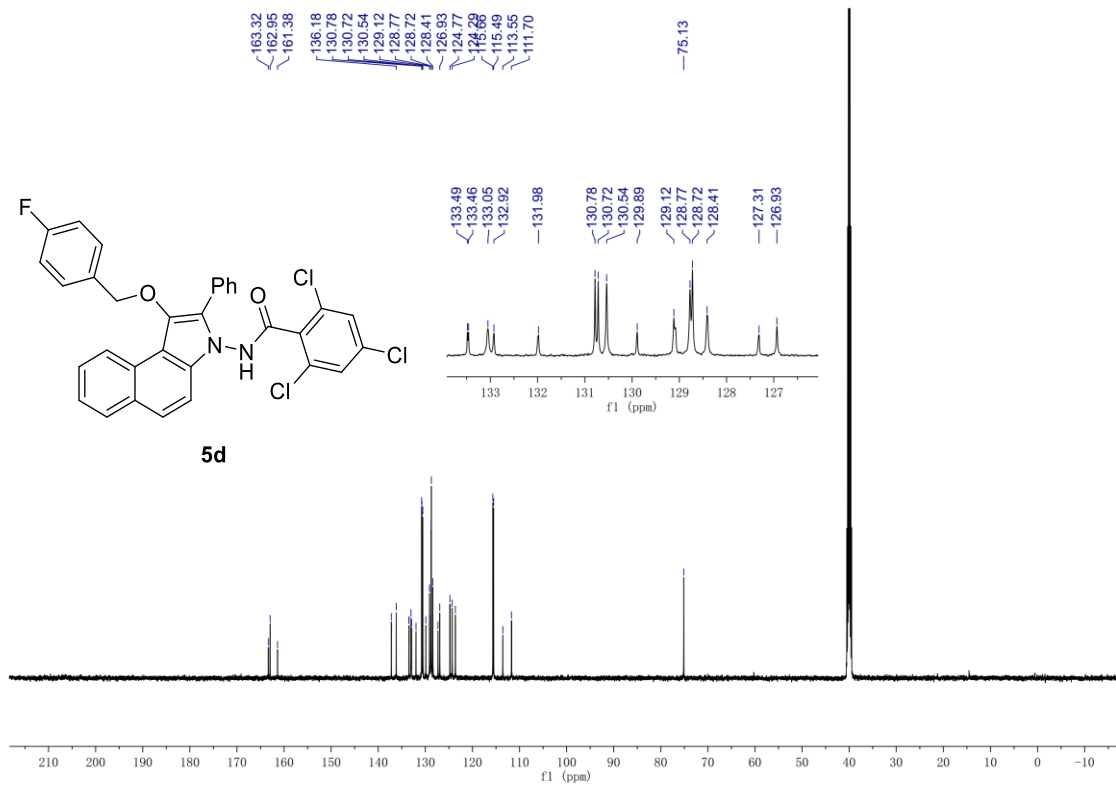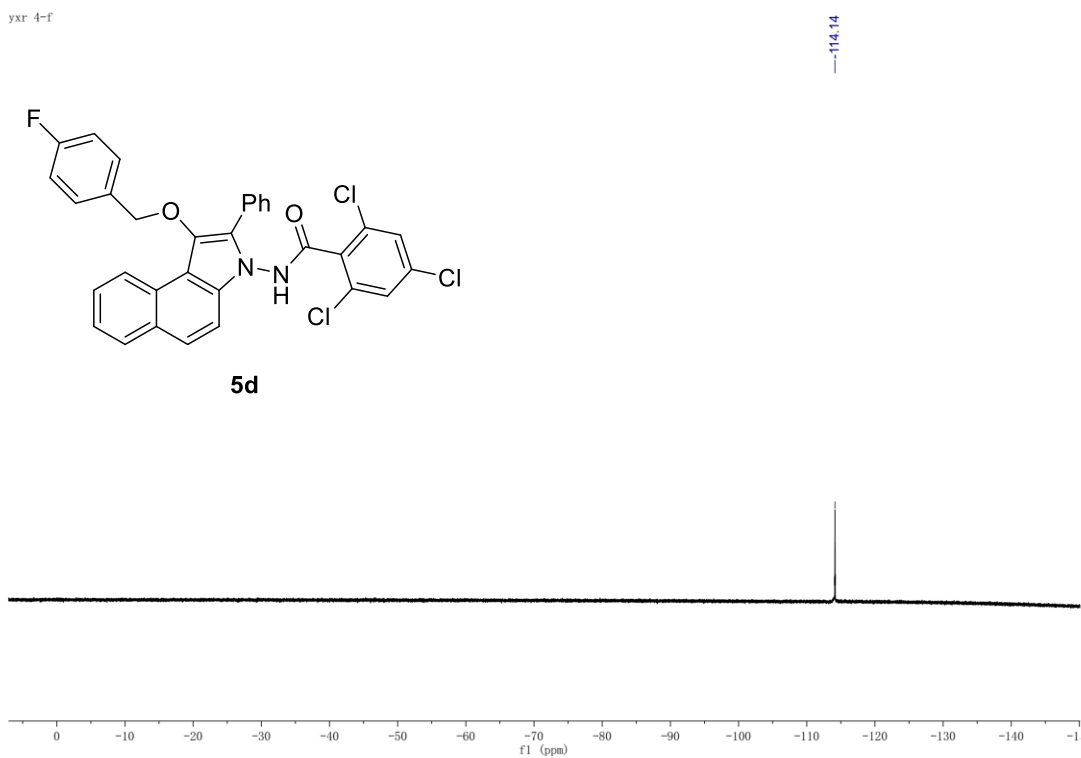

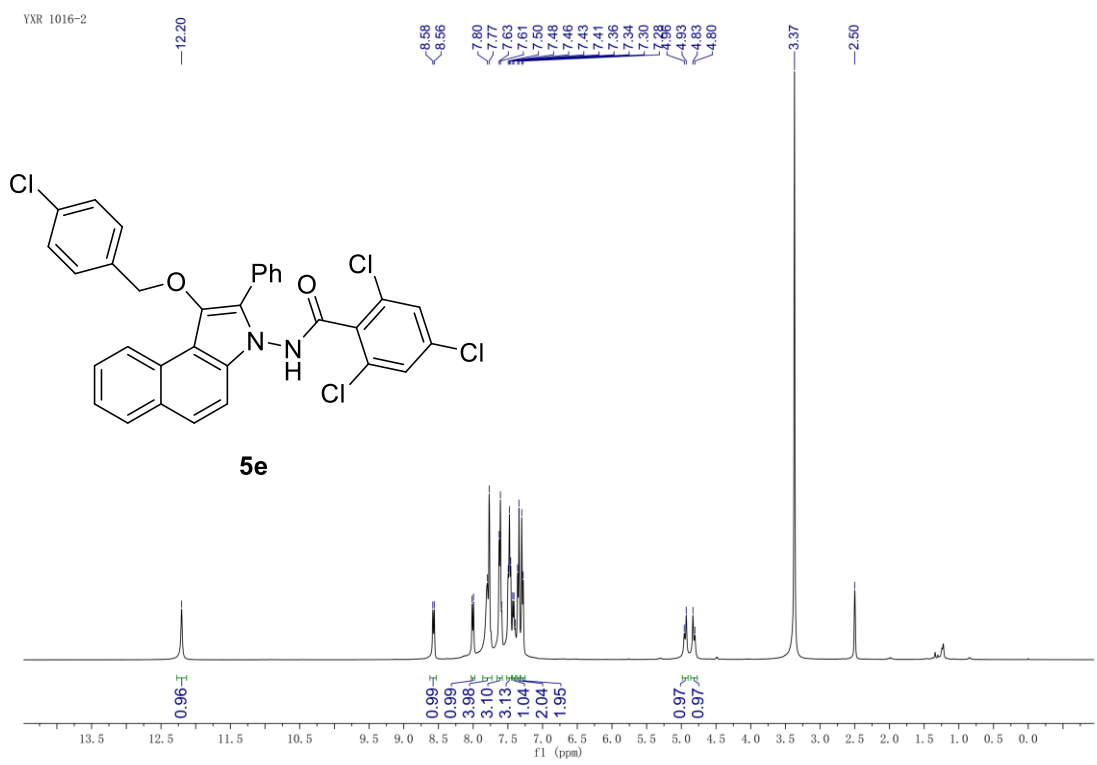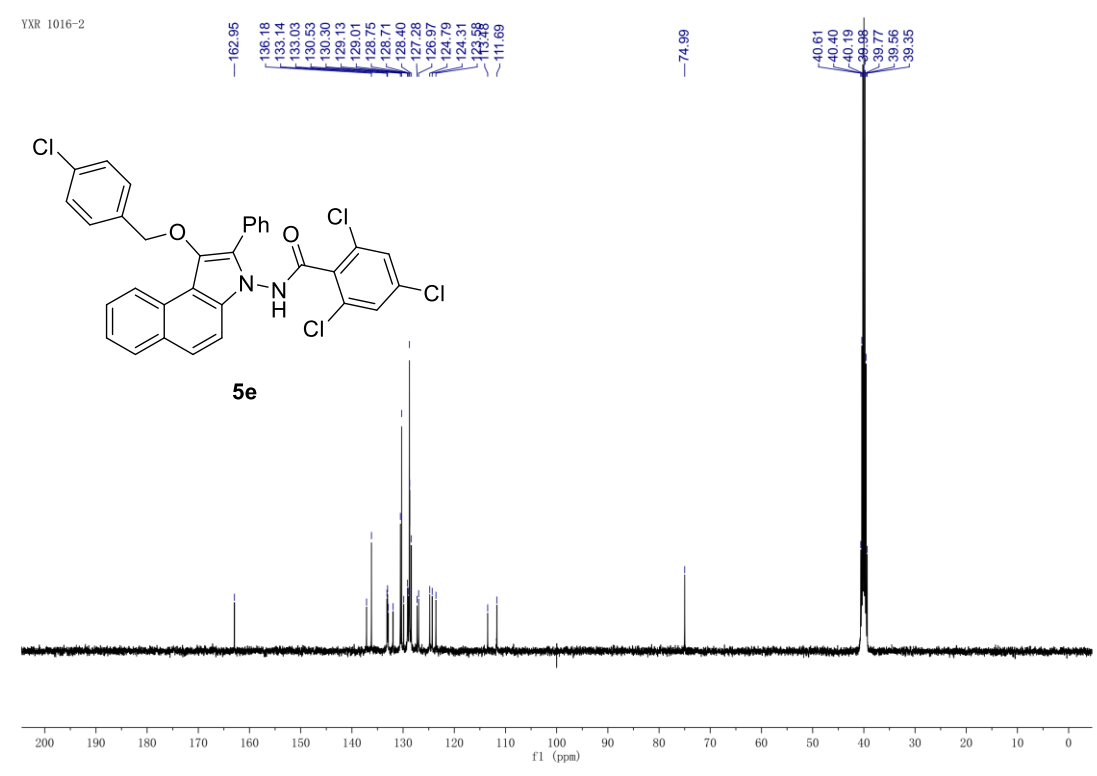

yxr 4-br

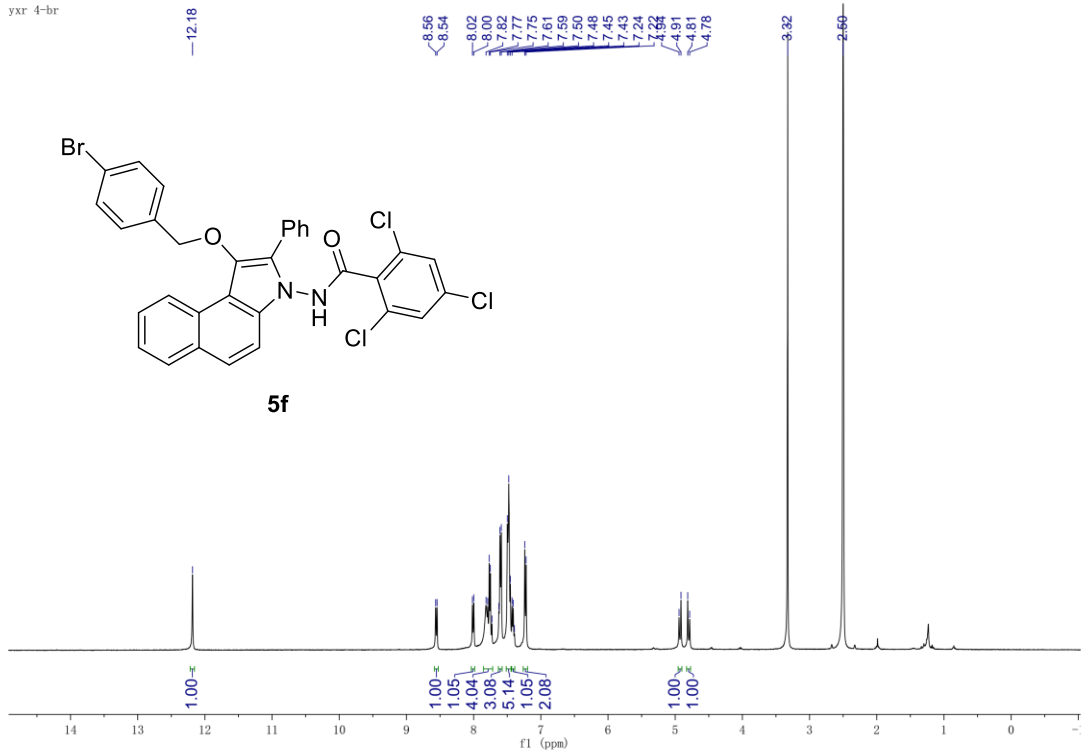

YXR 1014-3

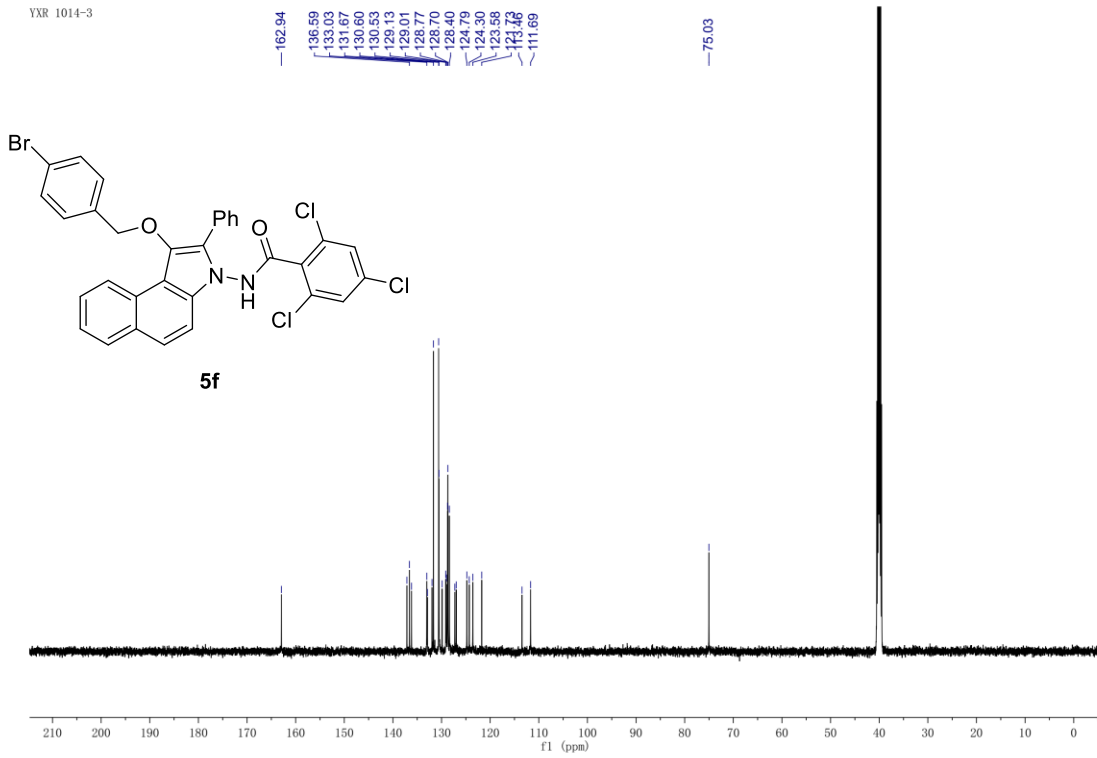

YXR 1014-2

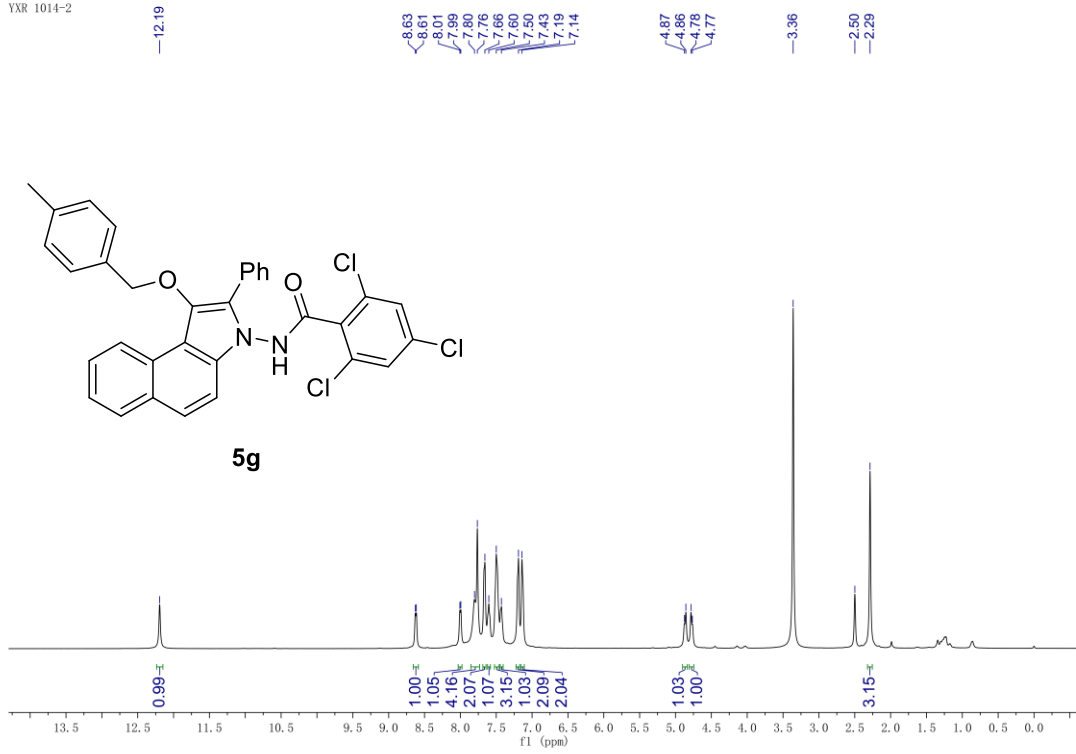

YXR 1014-2

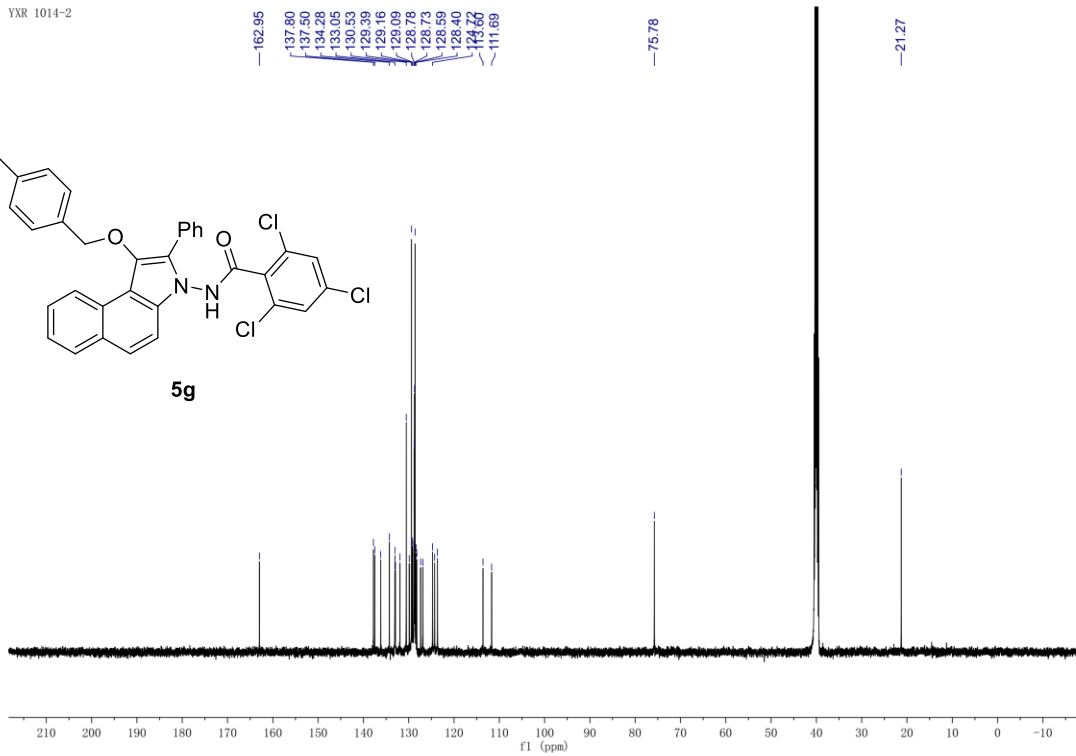



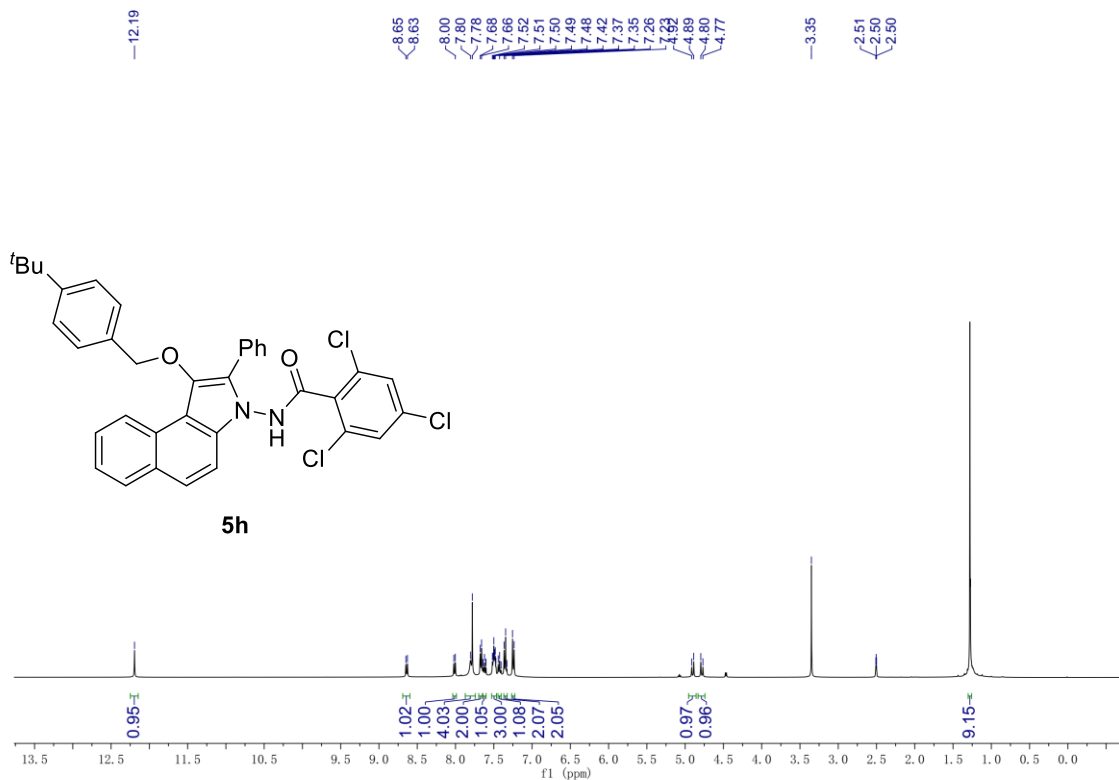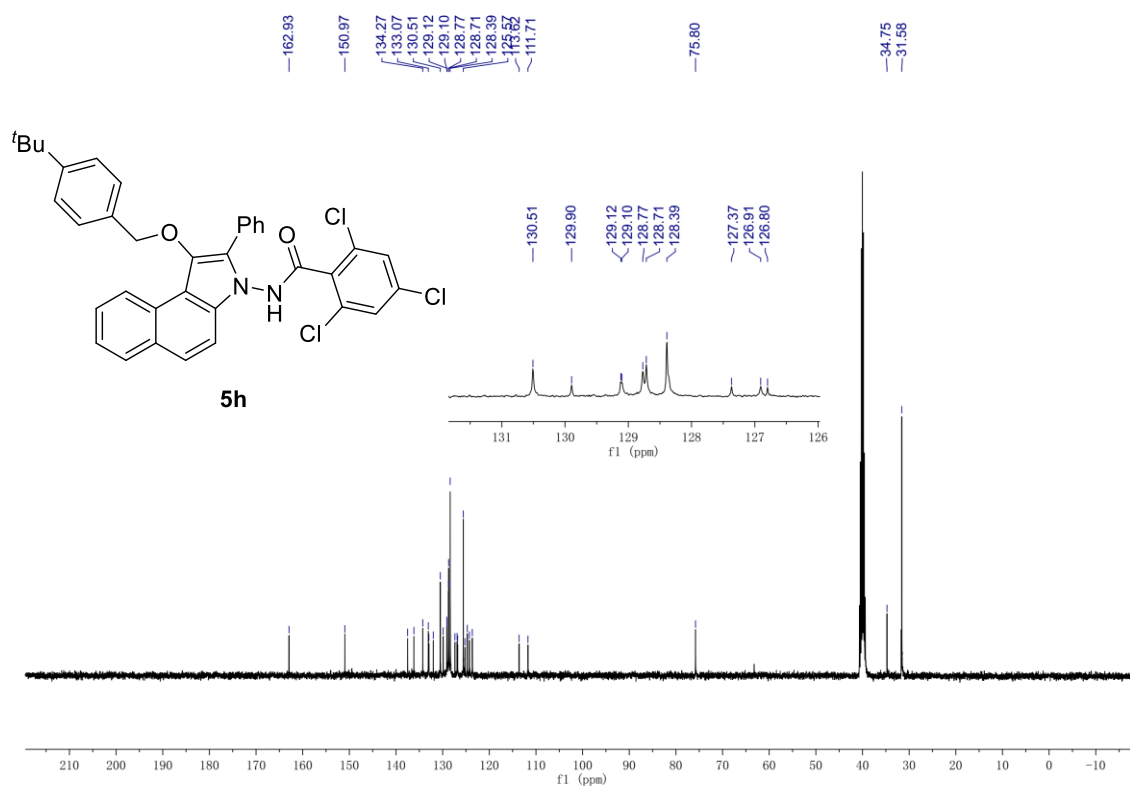

yxr 4-cf3

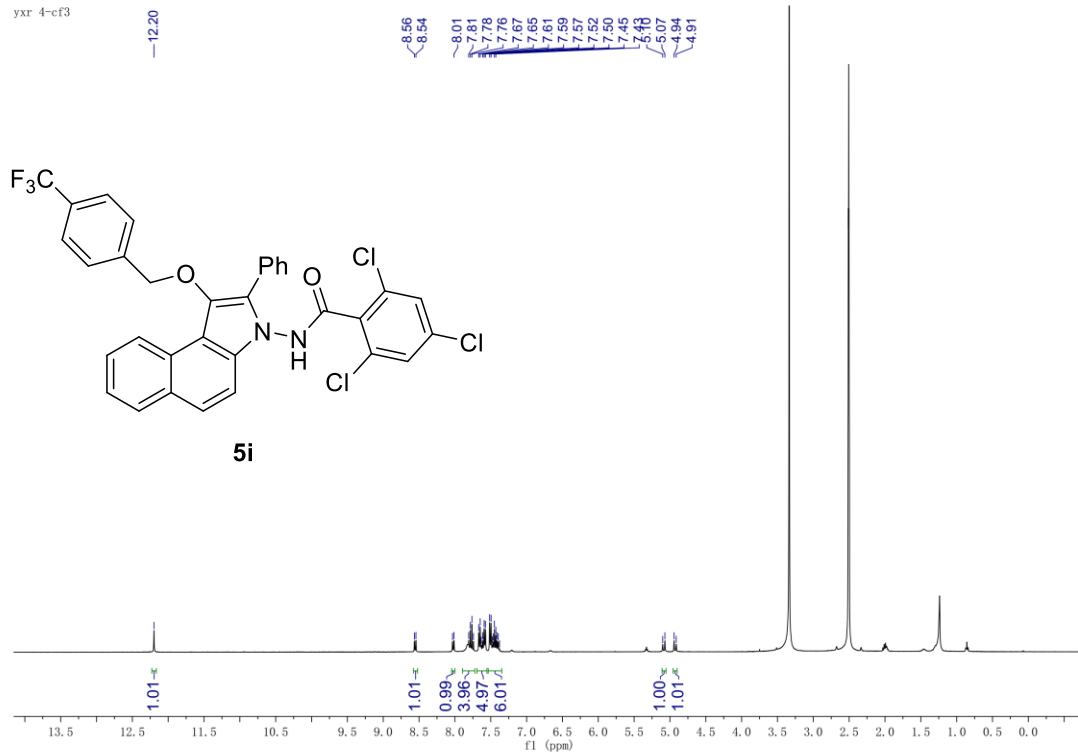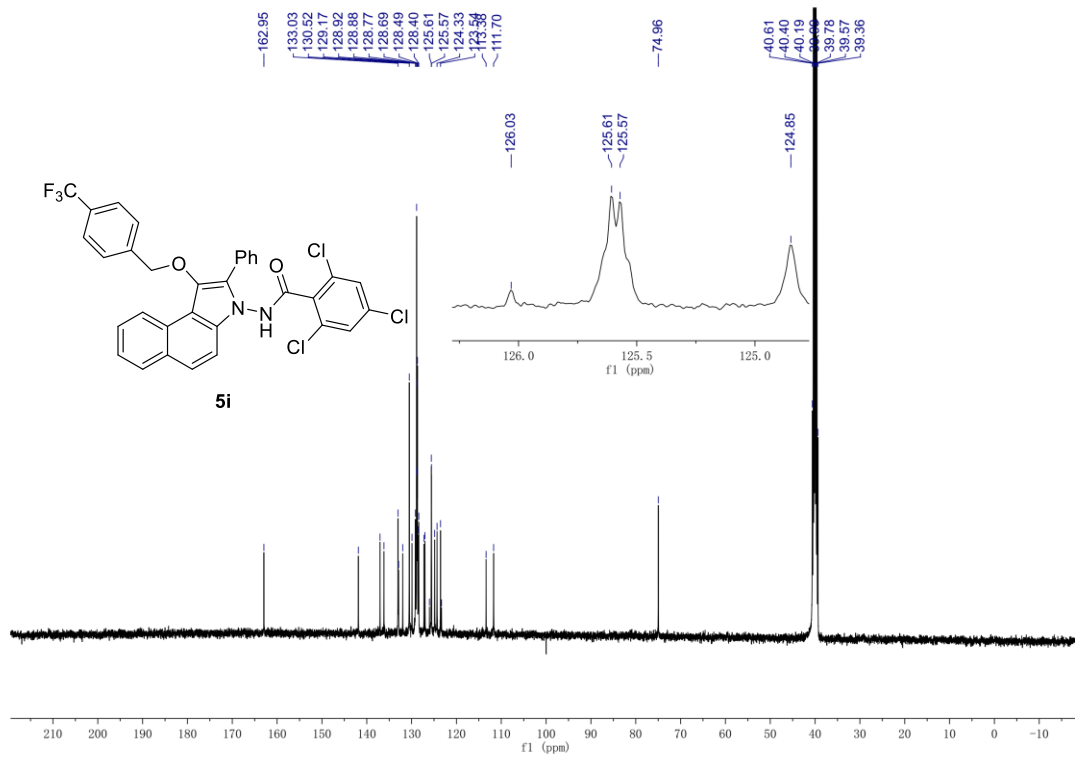

yxr 4-cf3

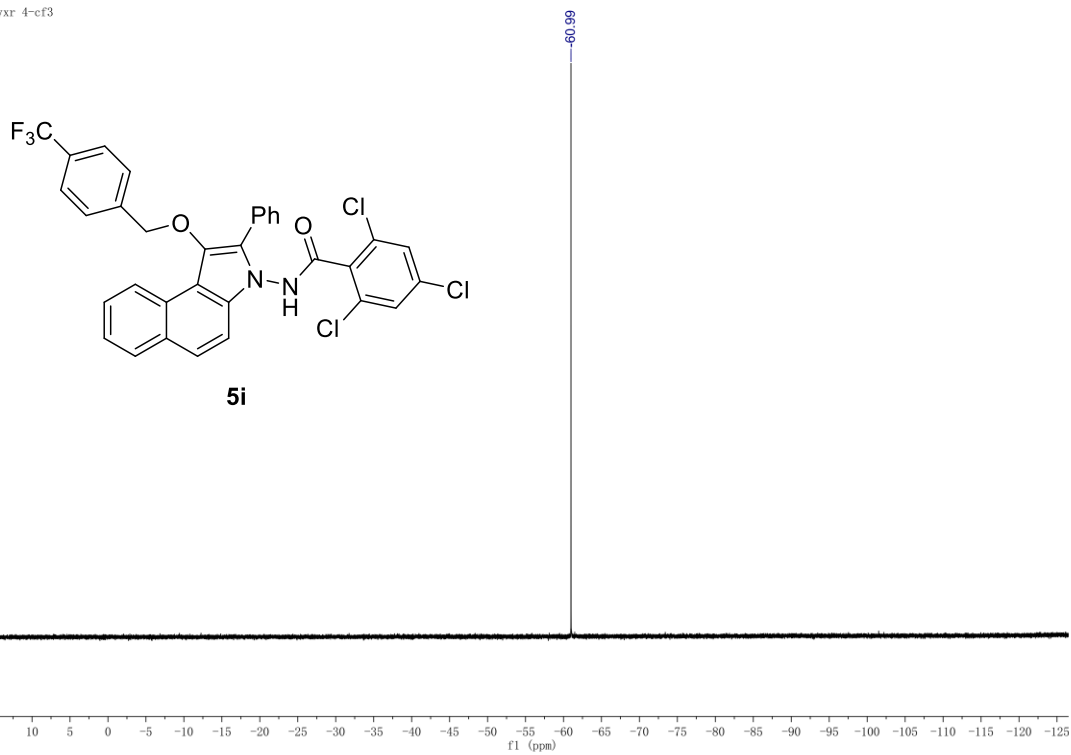

YXR 1014-6

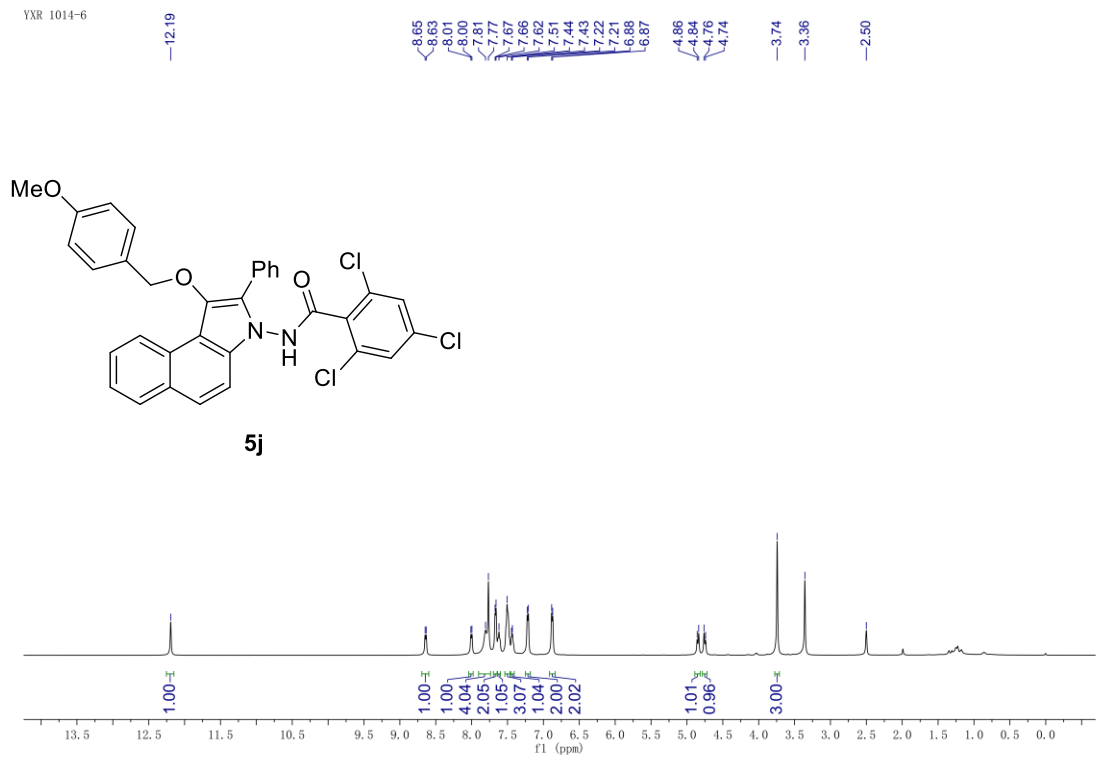

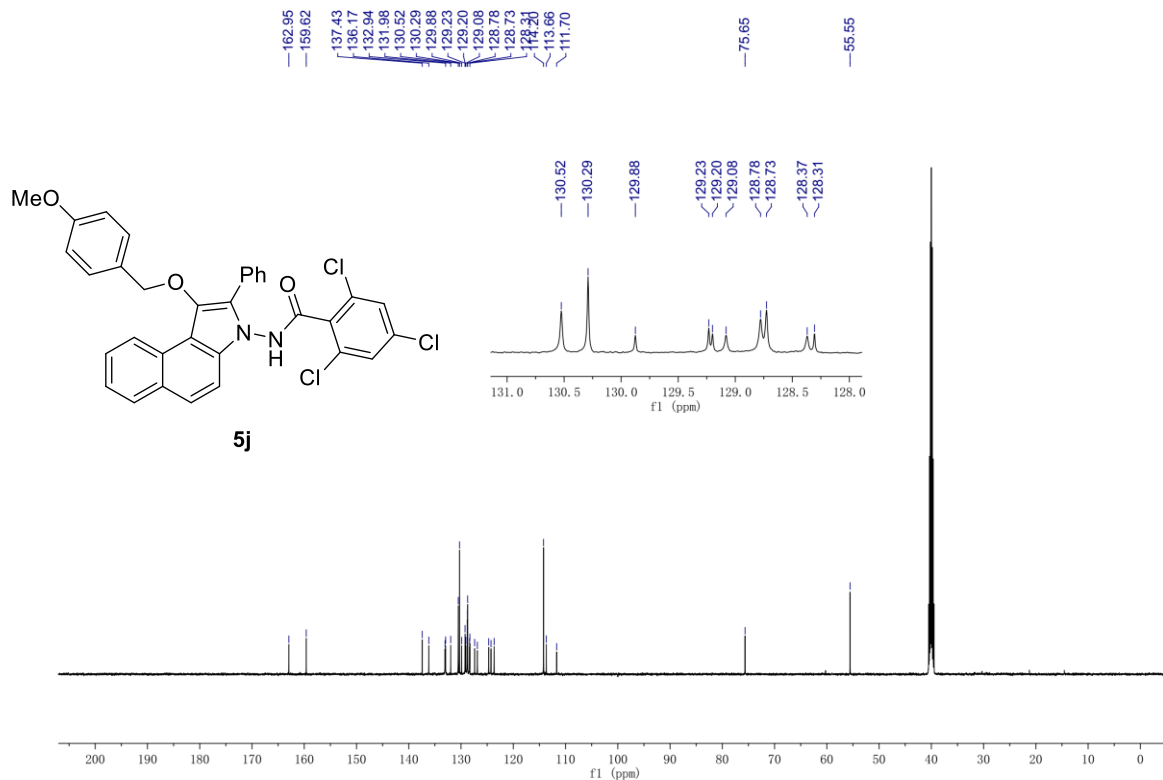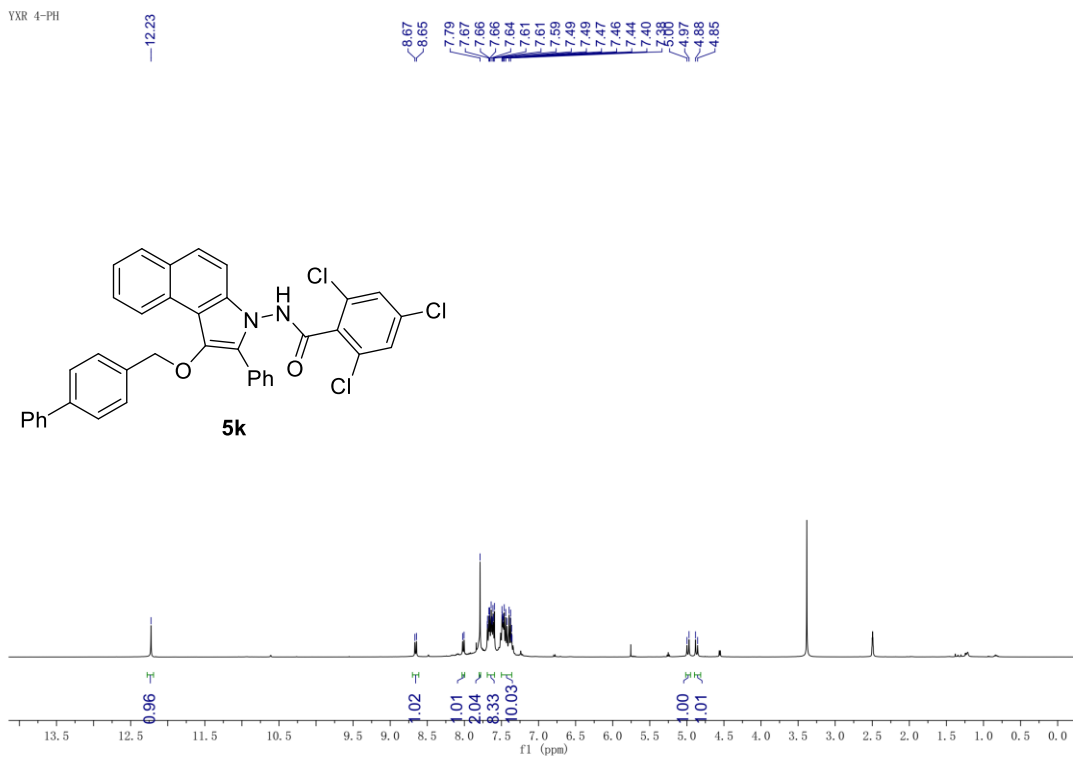

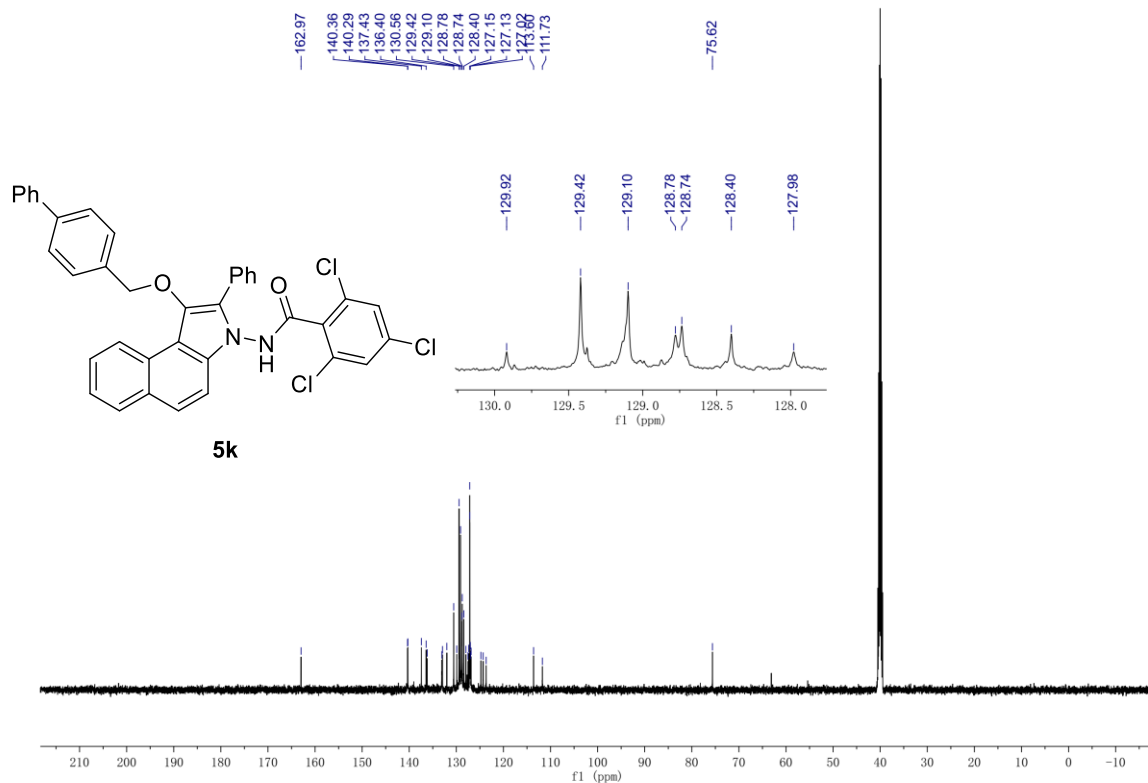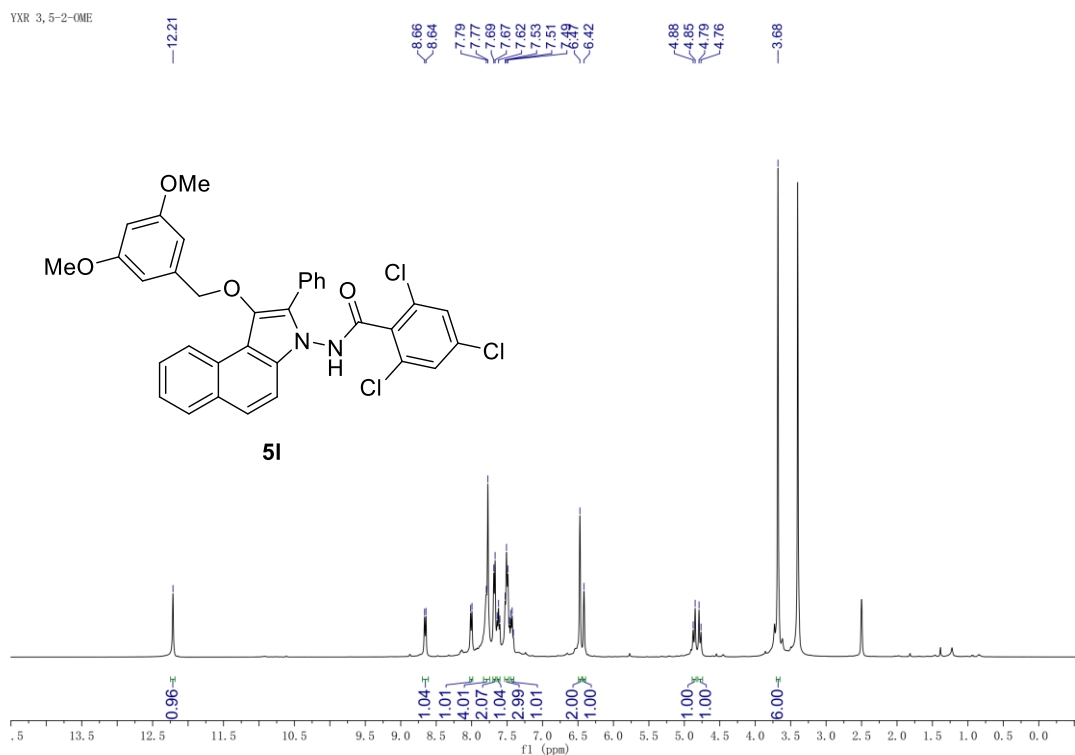

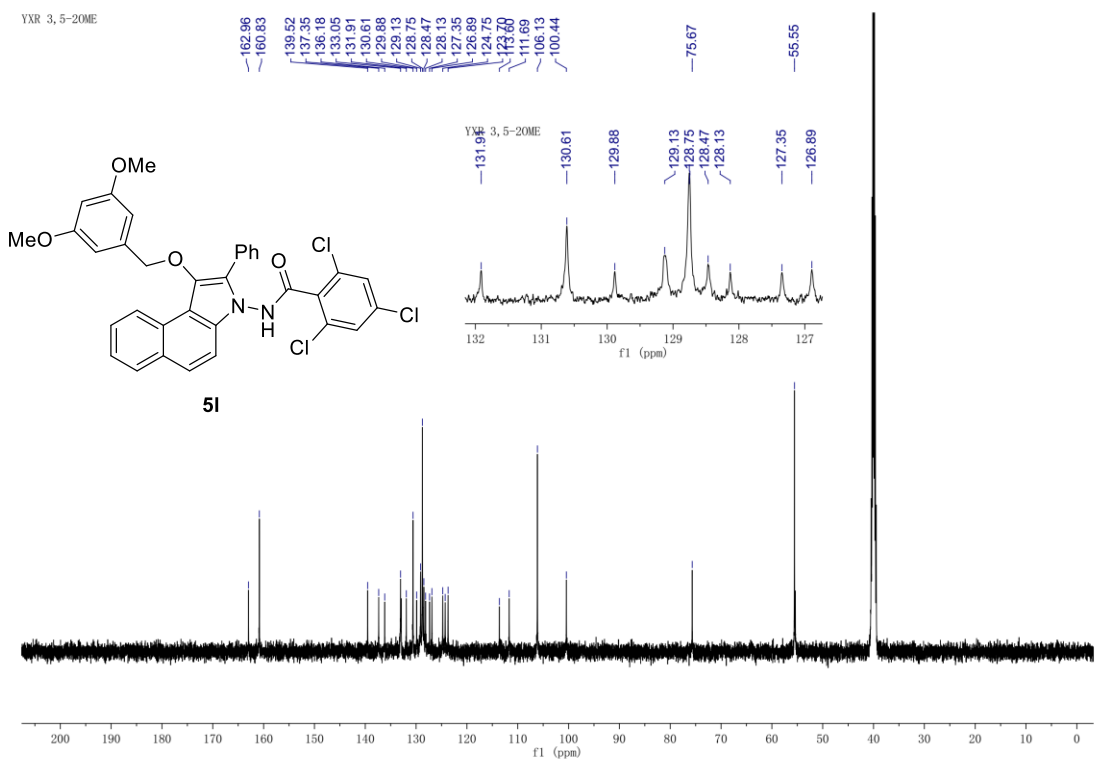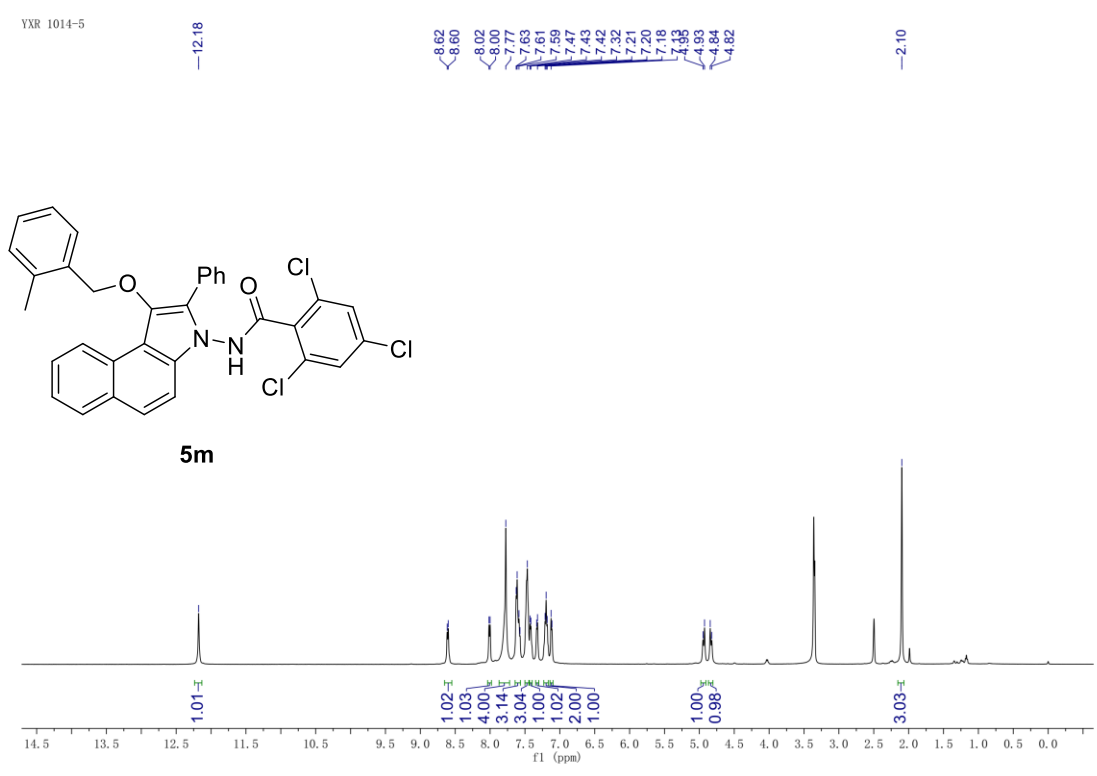

YXR 1014-5

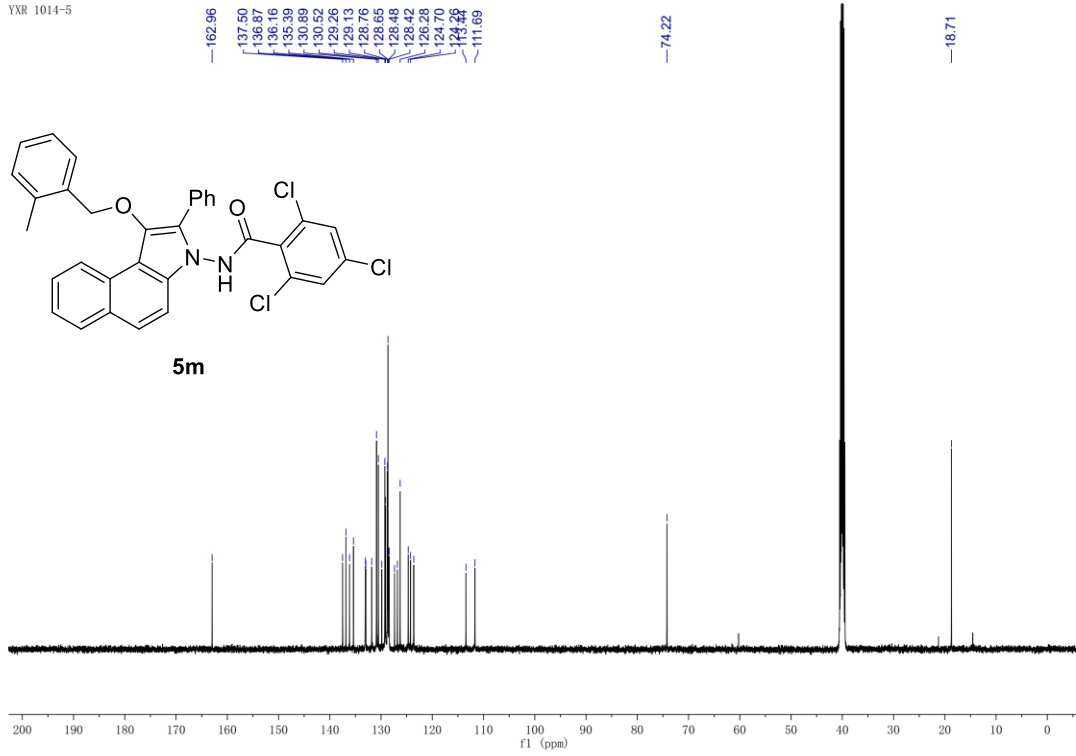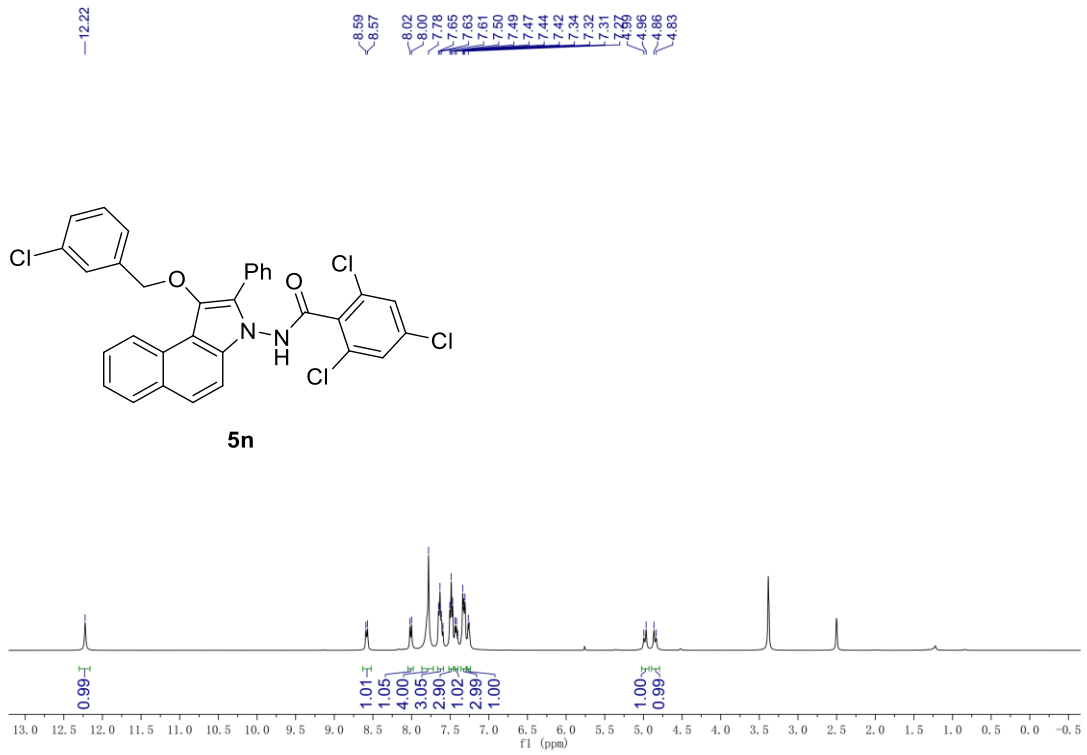

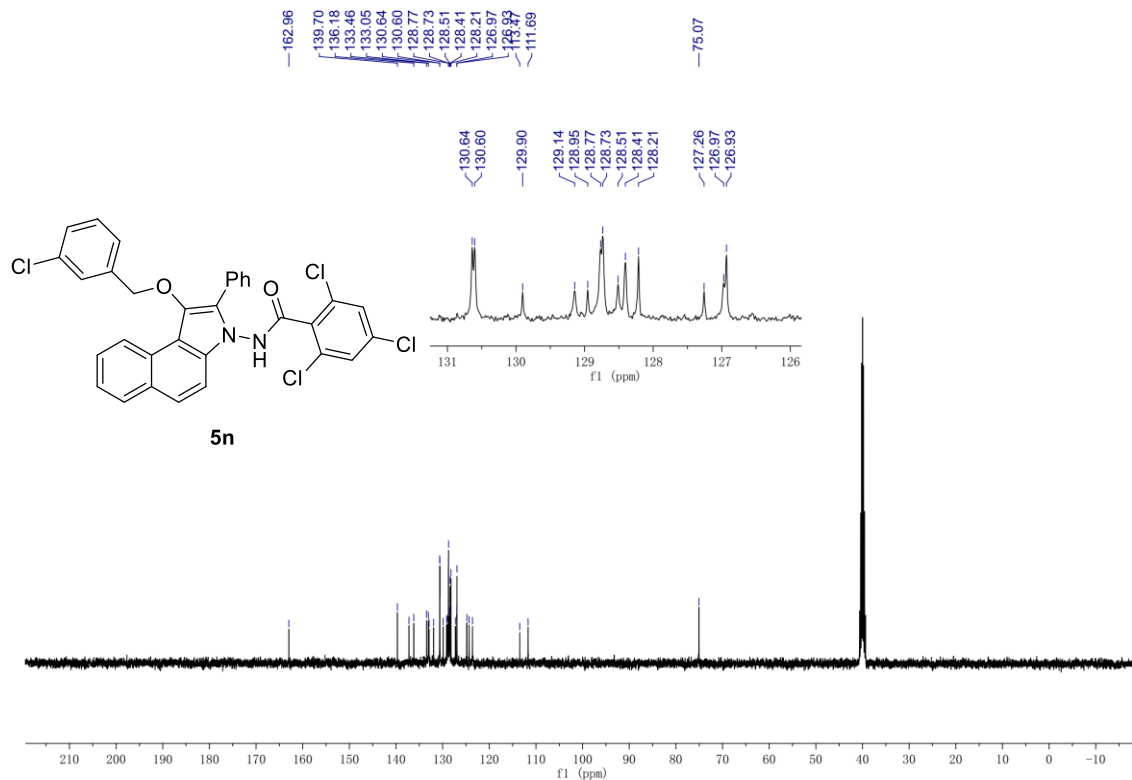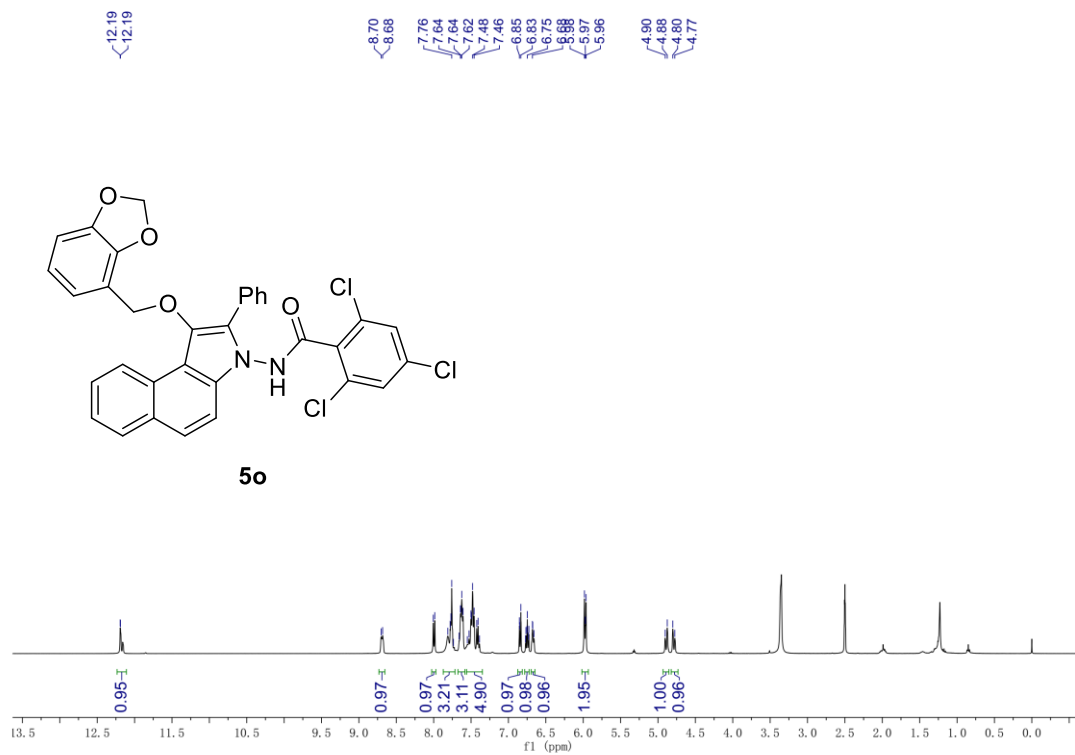



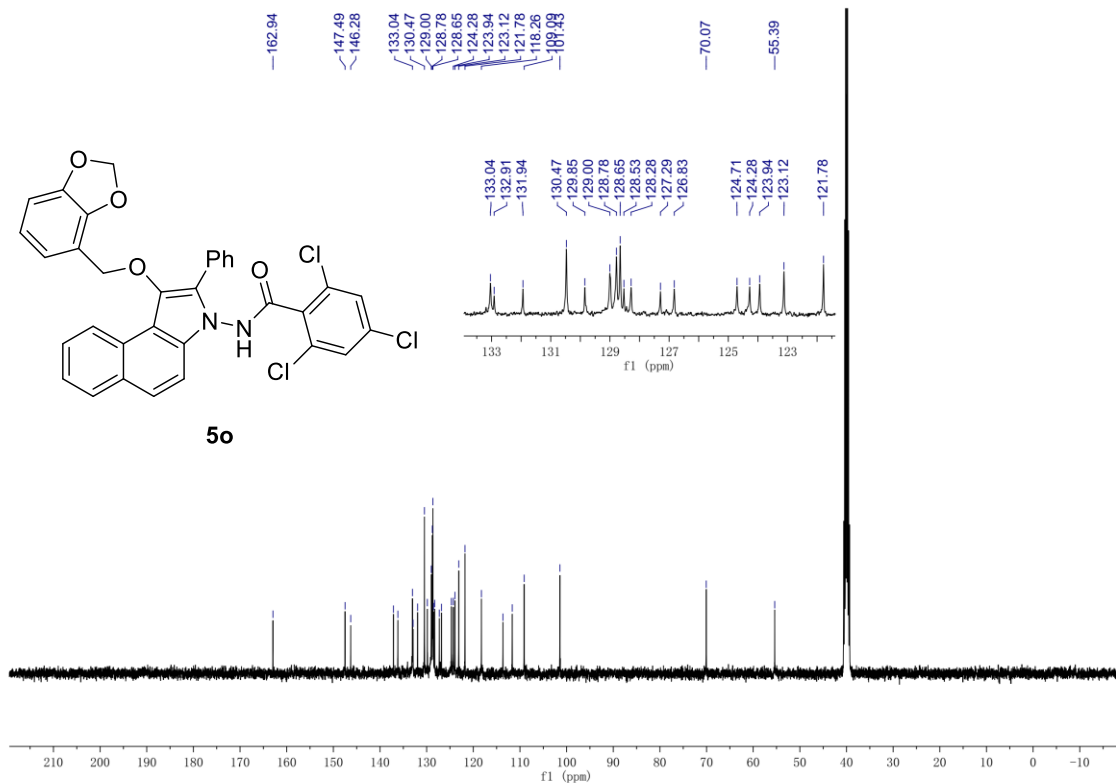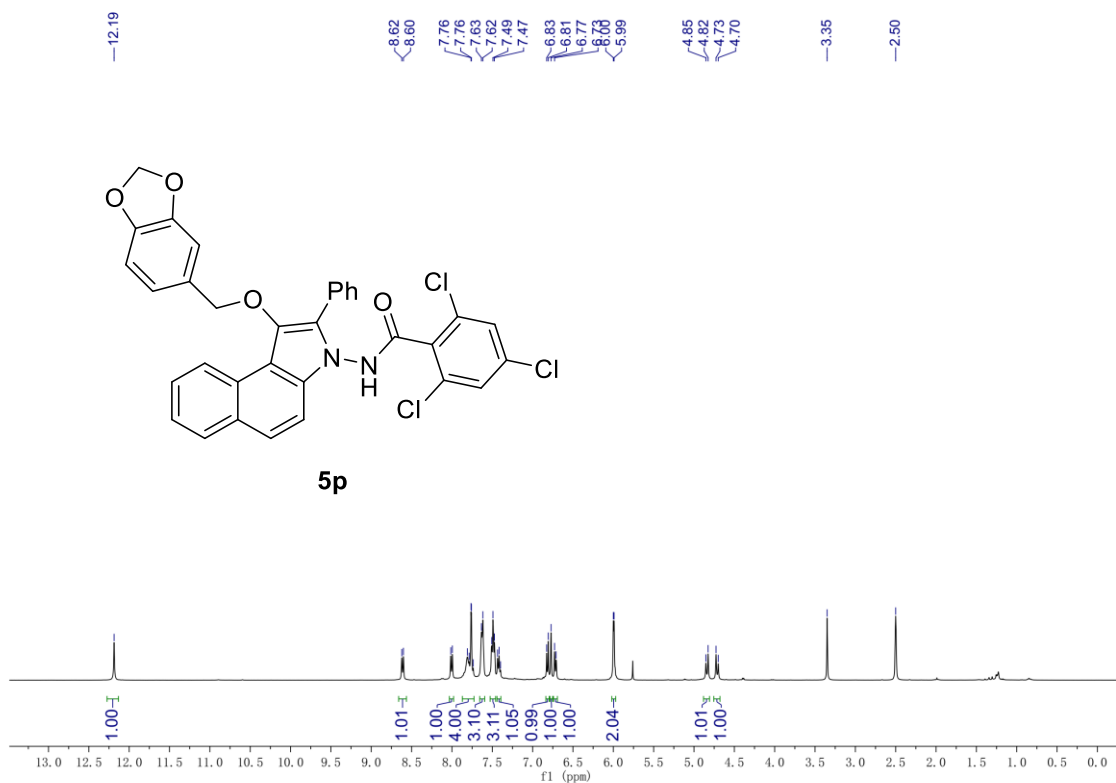

Dec05-2019-yxr-hujiao

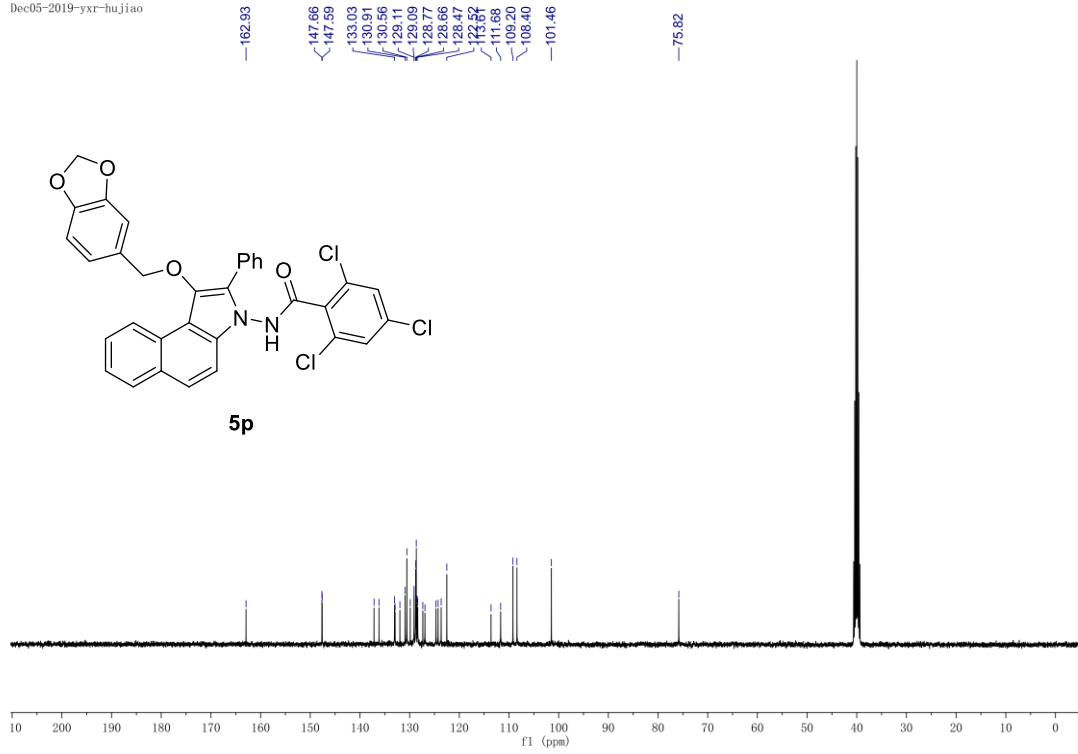

yxr cycl6

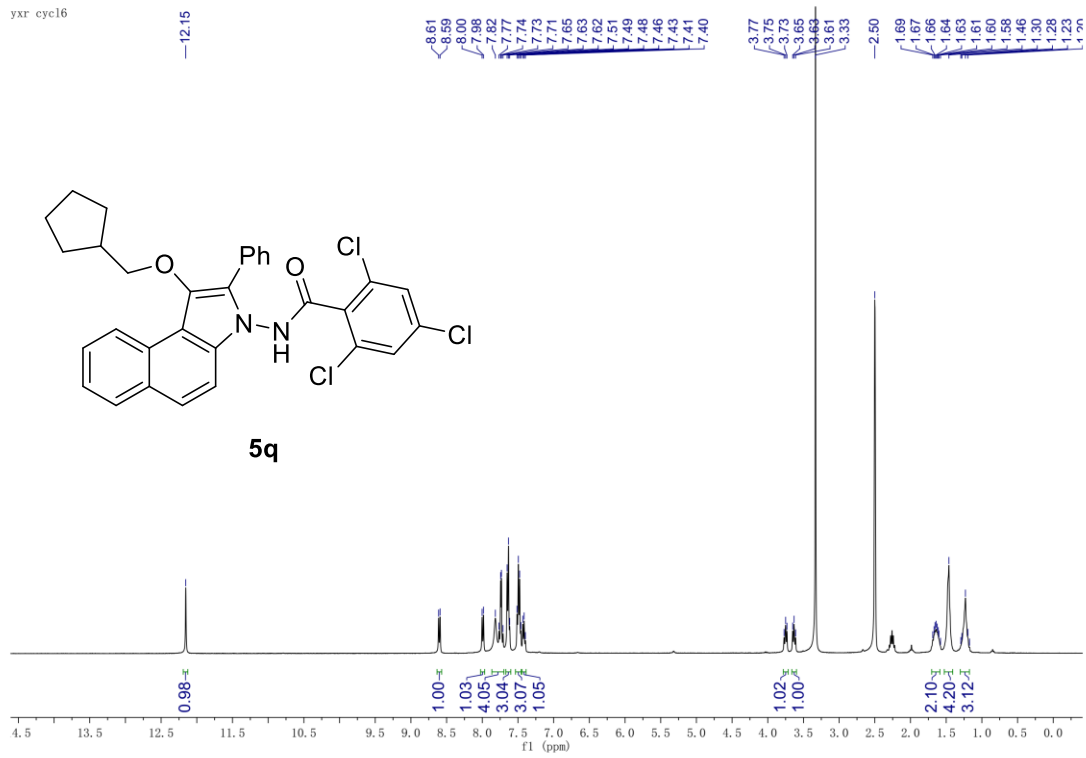

YXR 1015-2

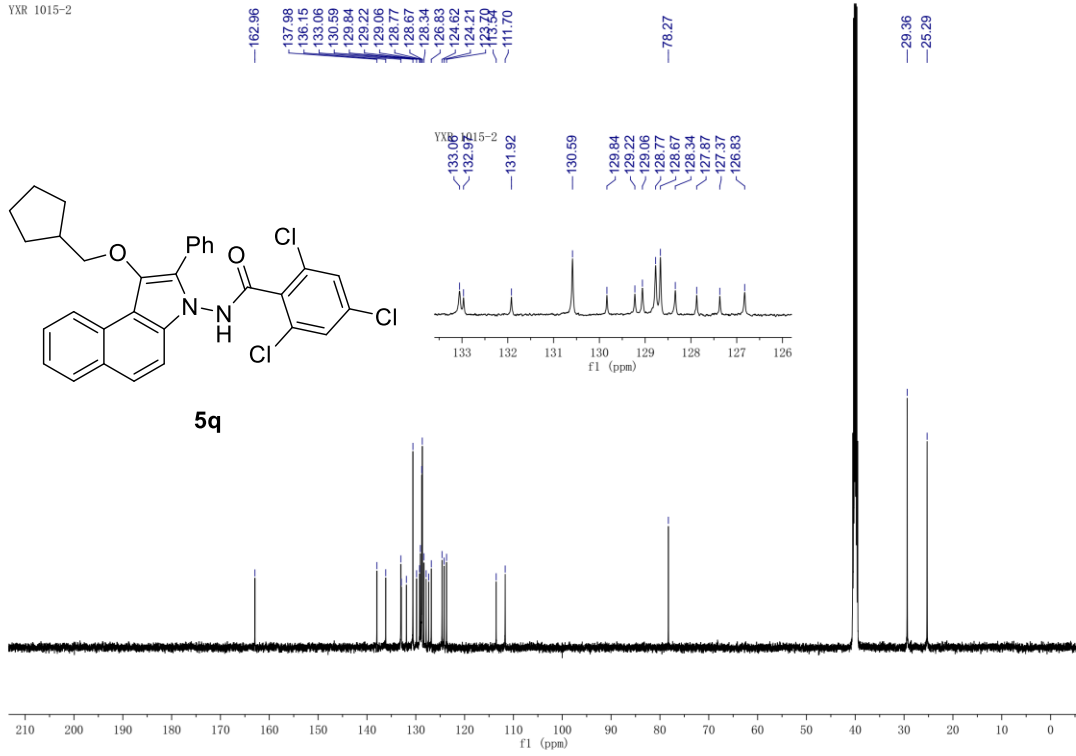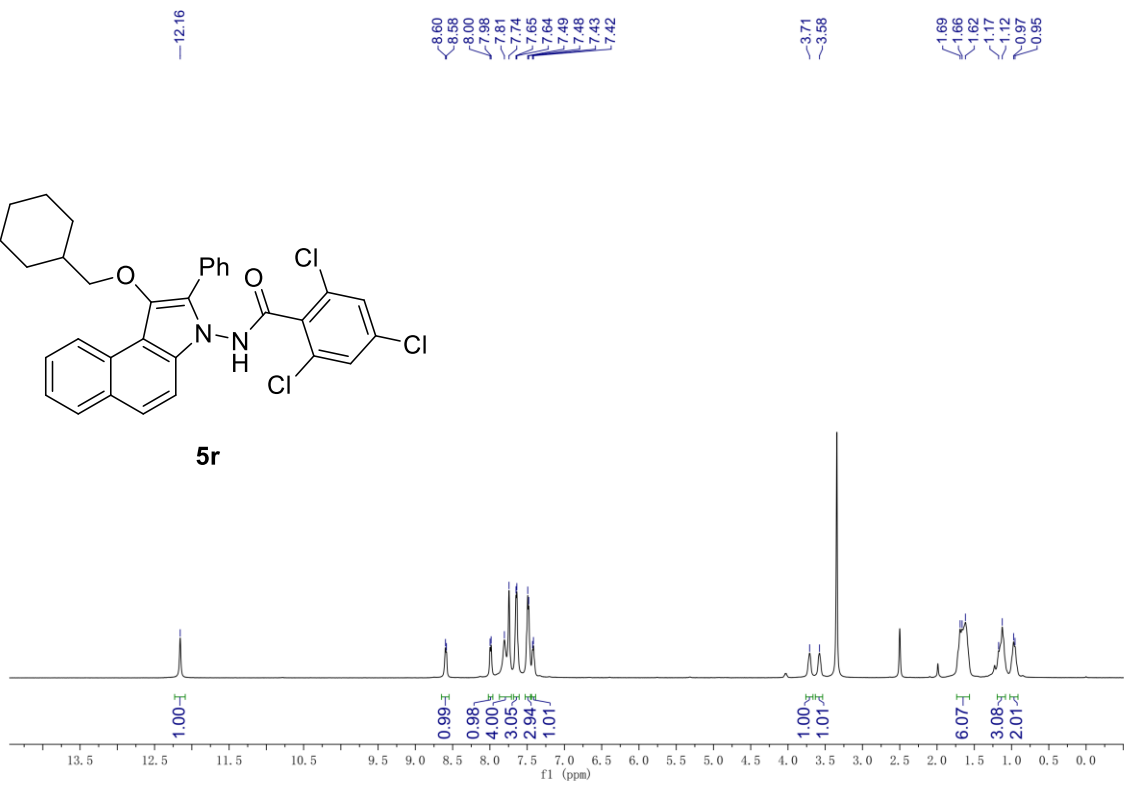

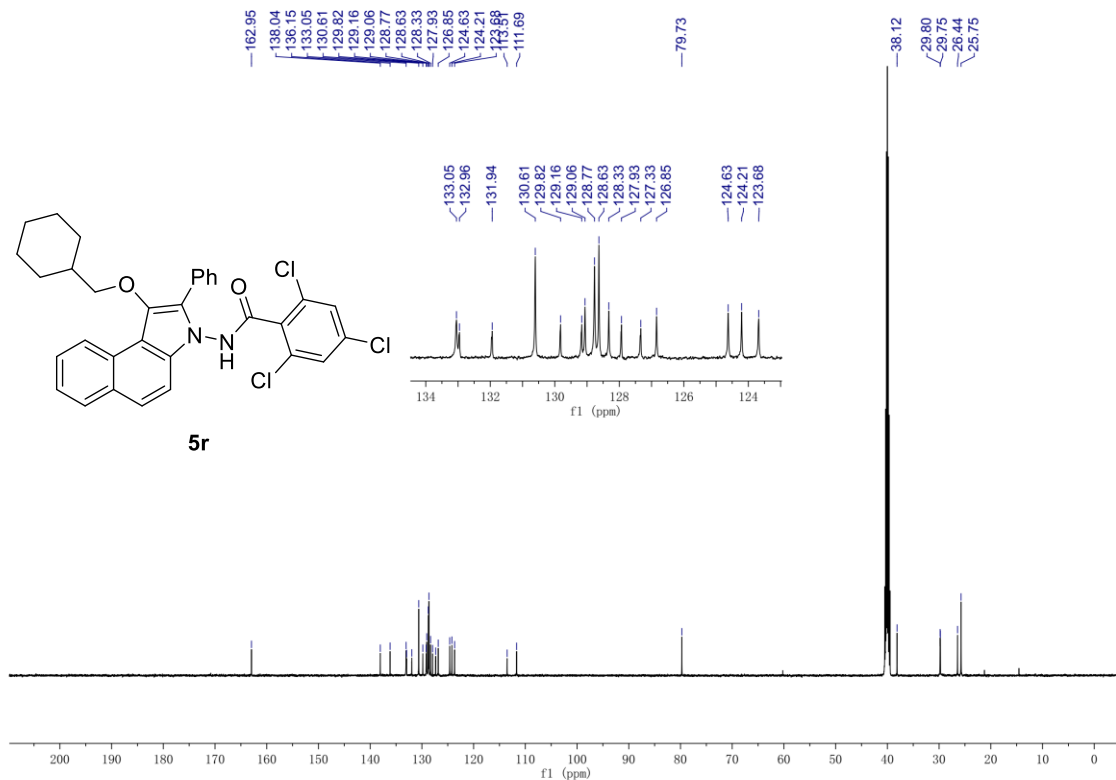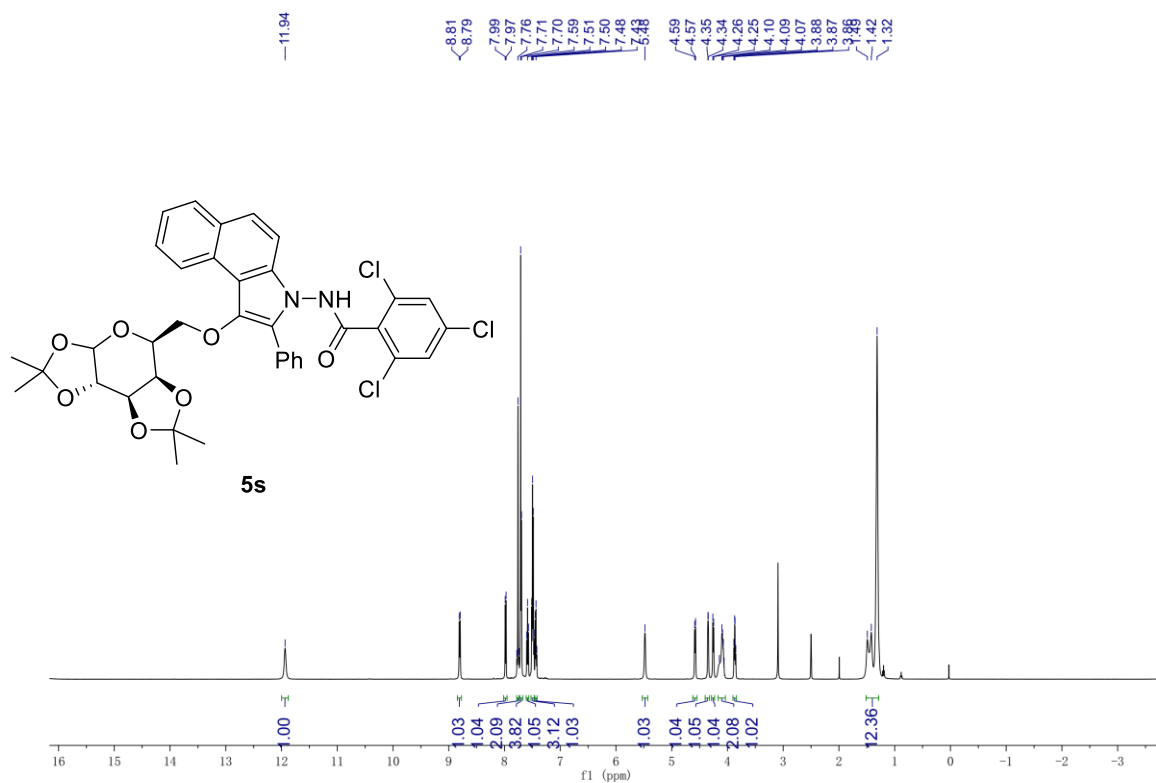

YXR D-BRT 1121 70

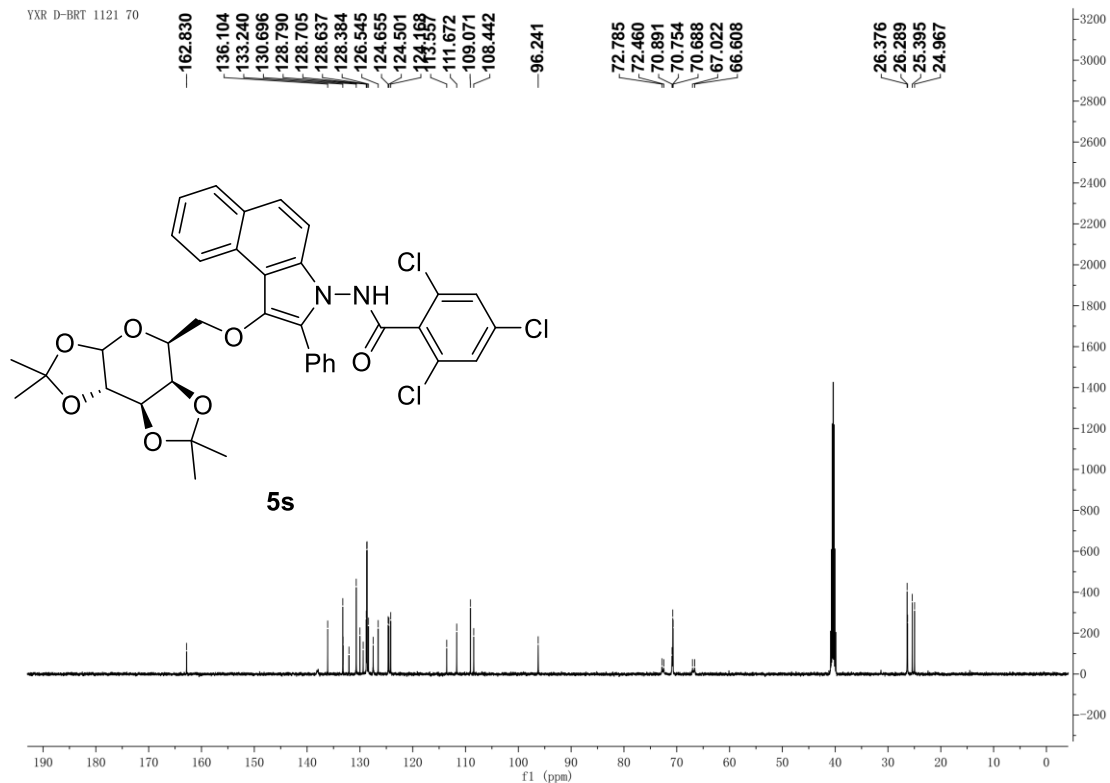

yxr 2ph meoh

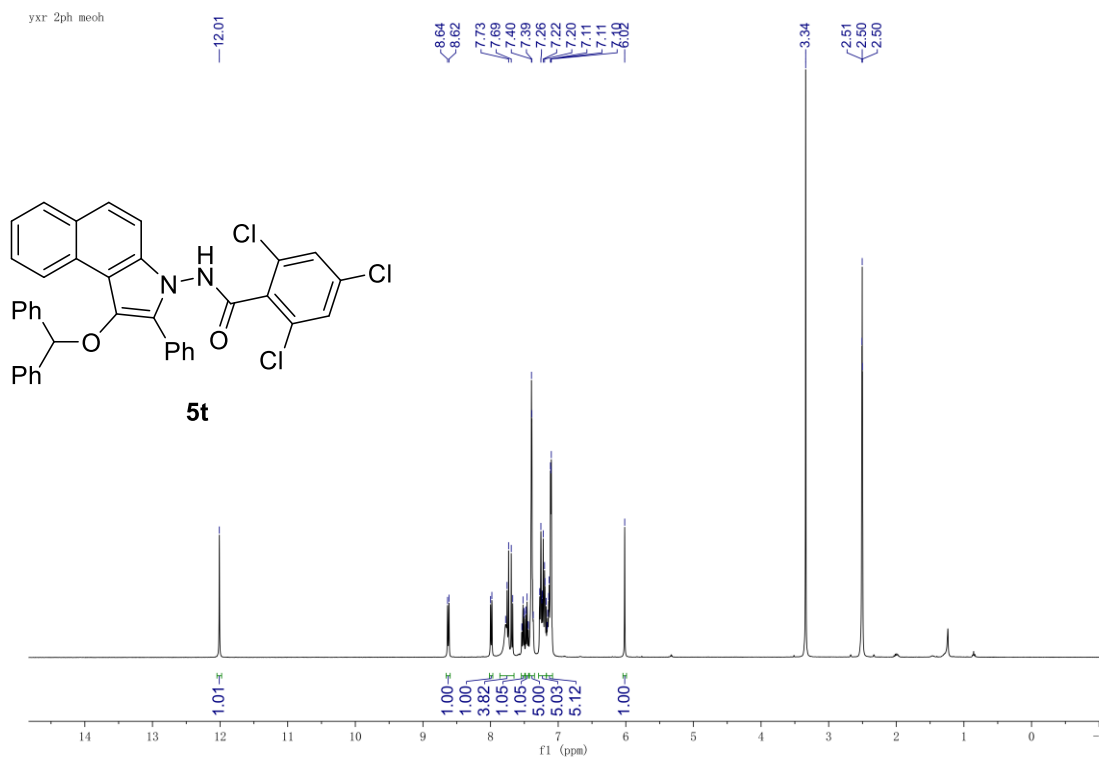

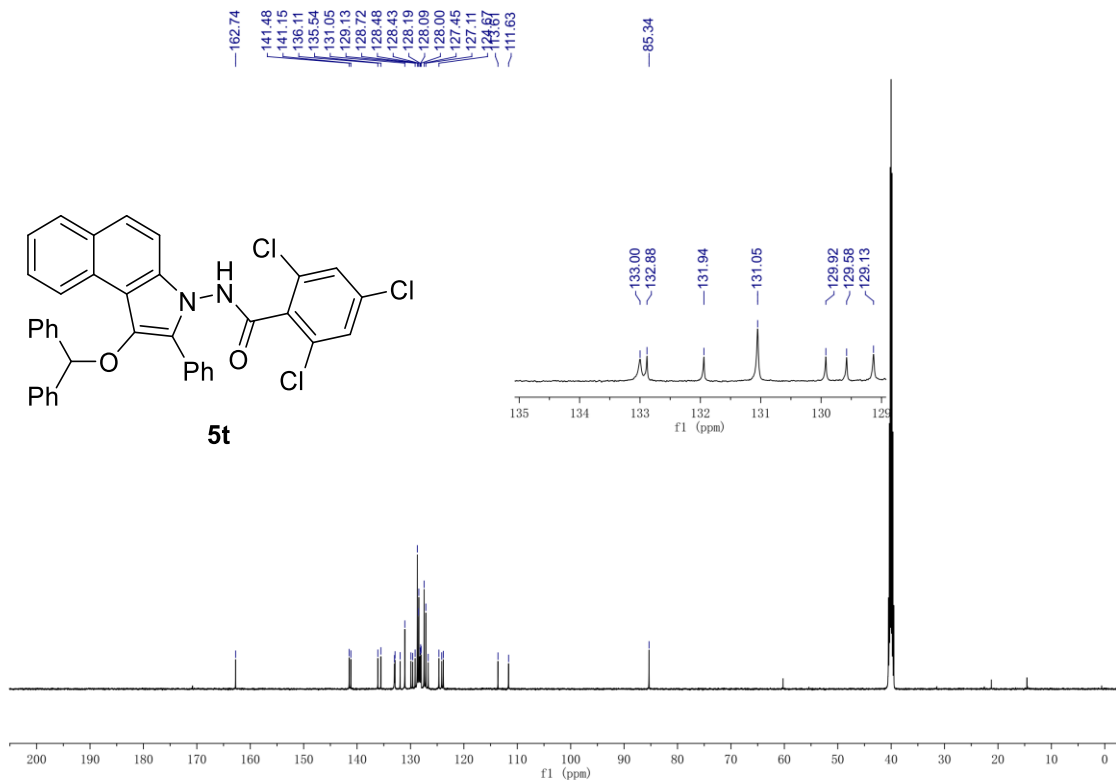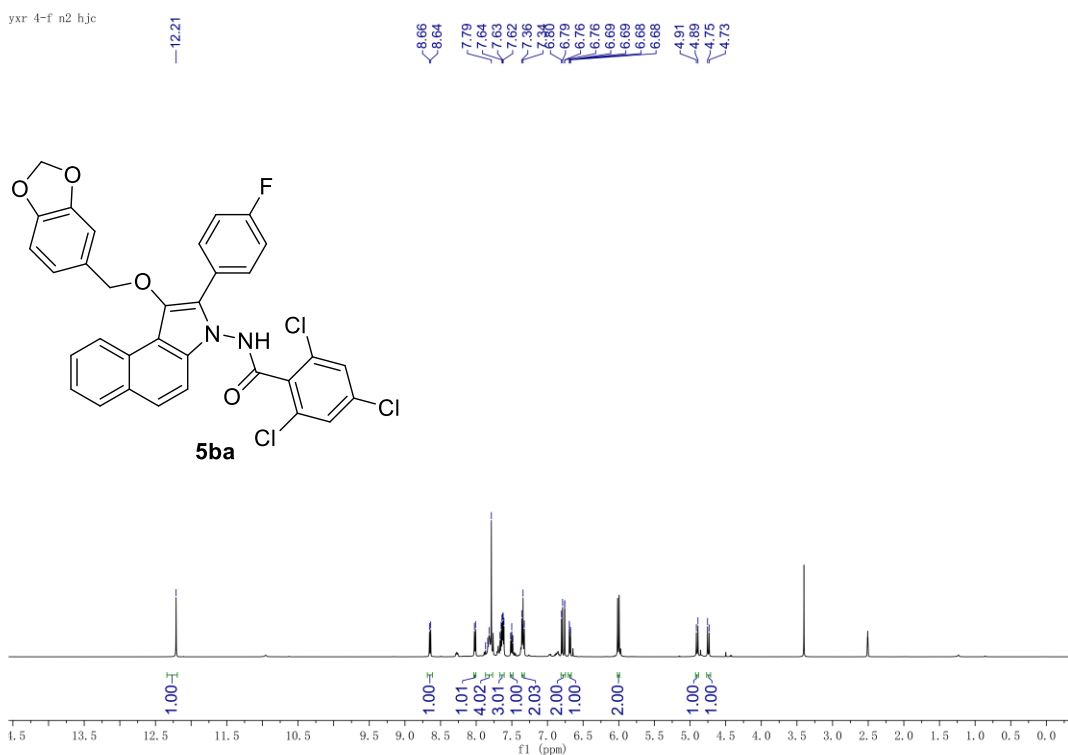

yxr 4-f n2 hjc

163.41  
162.95  
161.46  
147.62  
137.02  
136.24  
133.00  
132.86  
132.01  
130.78  
128.92  
127.74  
122.71  
115.68  
115.51  
113.59  
109.35  
108.49

75.91

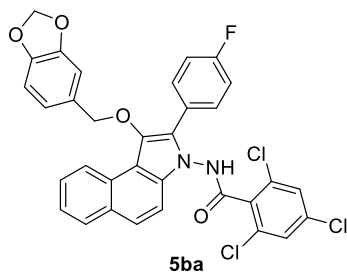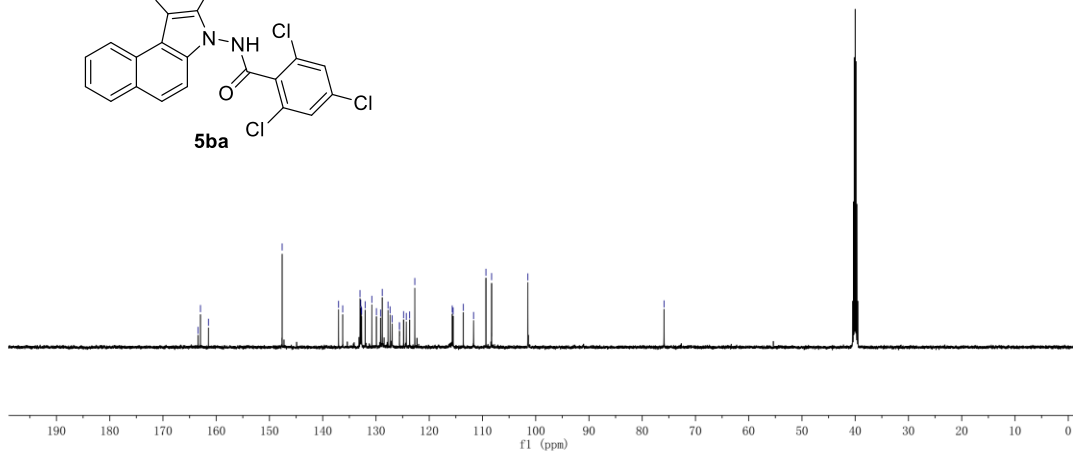

yxr 4-fn2 hjc f

113.70

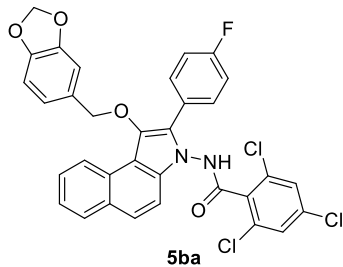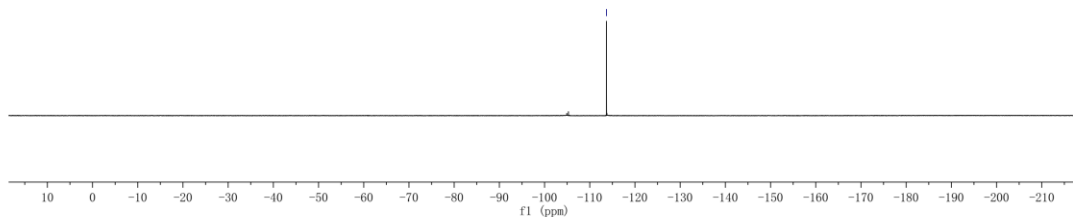

yxr 1206-1 down

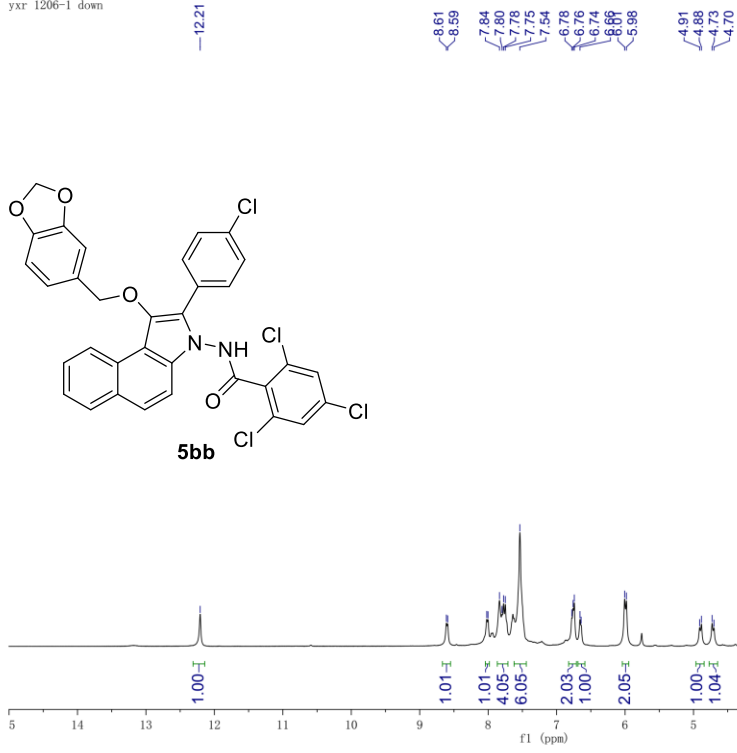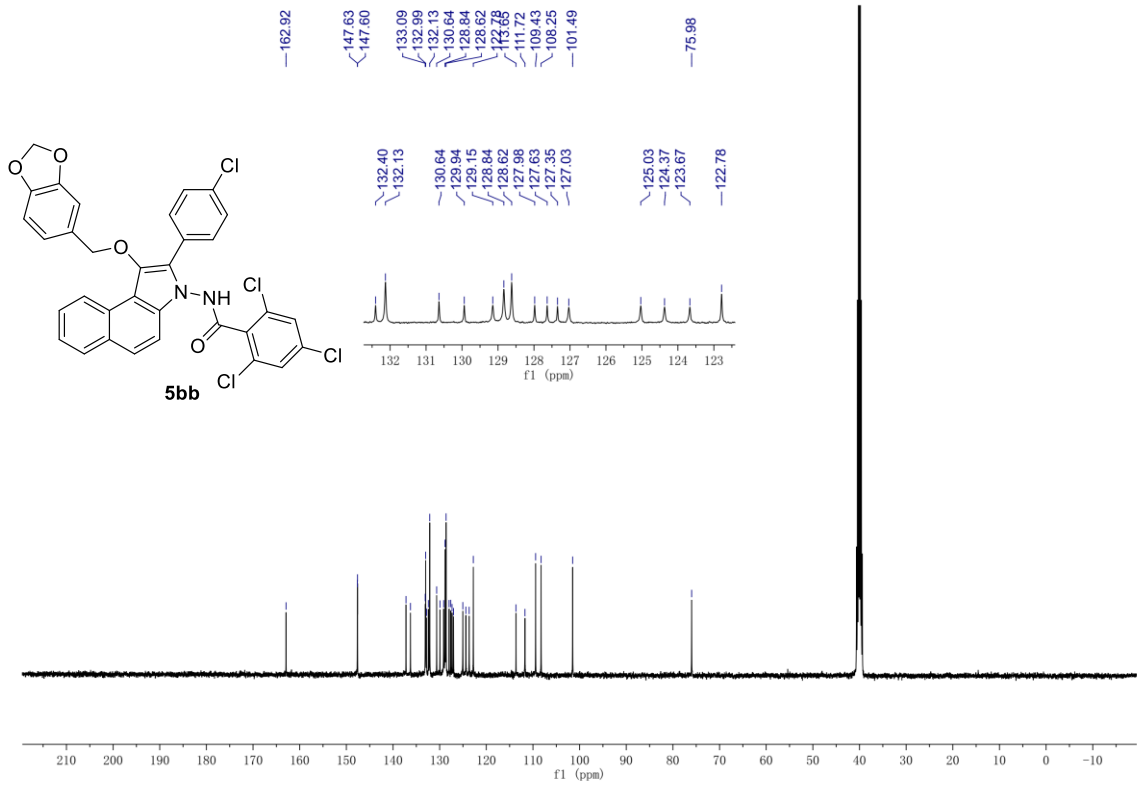



yxr 4-n2 br hjc

-12.23

8.64  
8.62  
7.78  
7.78  
7.67  
7.66  
7.52  
6.78  
6.76  
6.66  
6.65  
6.02  
5.99  
4.92  
4.90  
4.75  
4.72

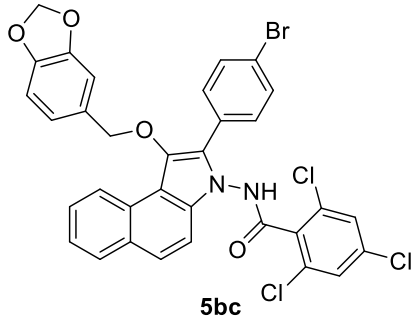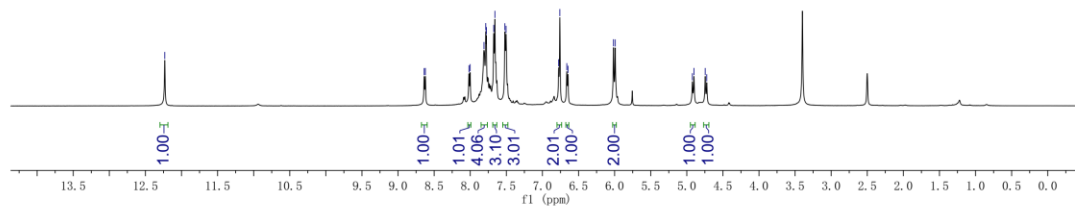

yxr 4-n2 br hjc

-162.92

147.63  
147.59  
137.17  
133.00  
132.45  
132.37  
131.54  
130.61  
128.84  
127.70  
122.80  
122.80  
117.72  
109.44  
108.24  
101.50

-75.98

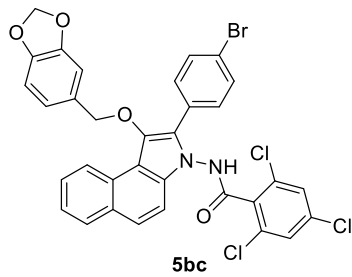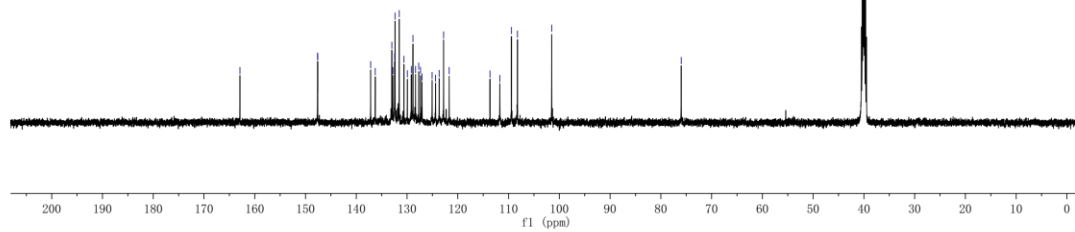

yxr 4-cf3 n3 hjc

-12.32

8.65  
8.63  
8.61  
7.81  
7.80  
7.76  
7.75  
6.99  
6.70  
6.62  
6.60  
5.97  
5.94  
4.97  
4.95  
4.74  
4.73

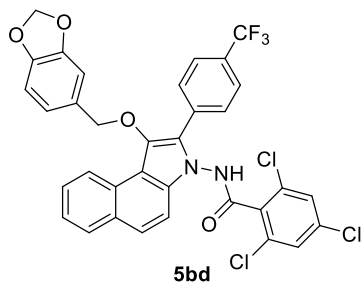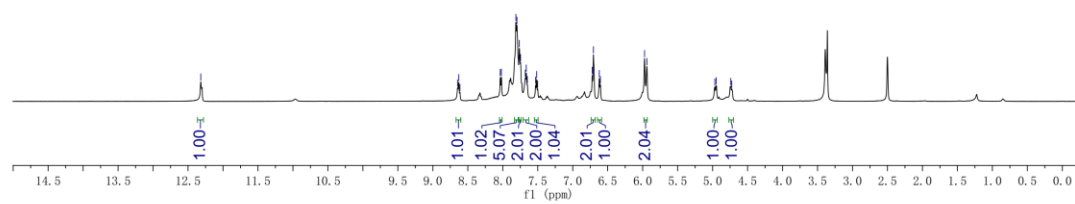

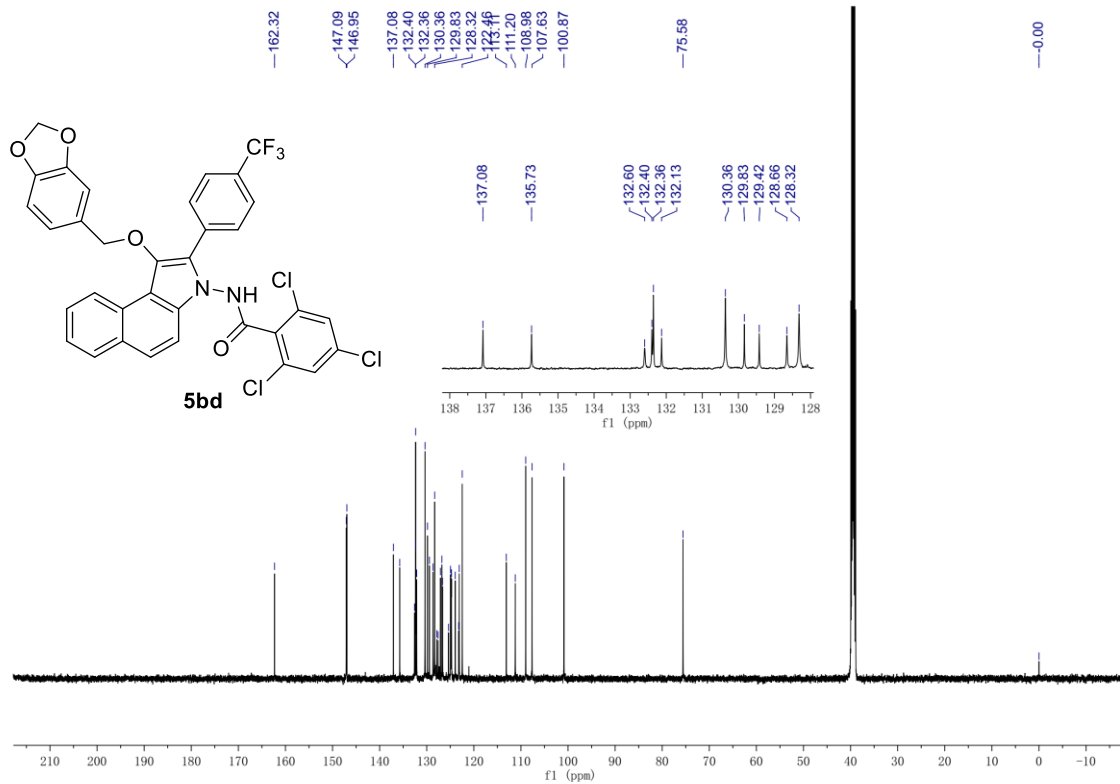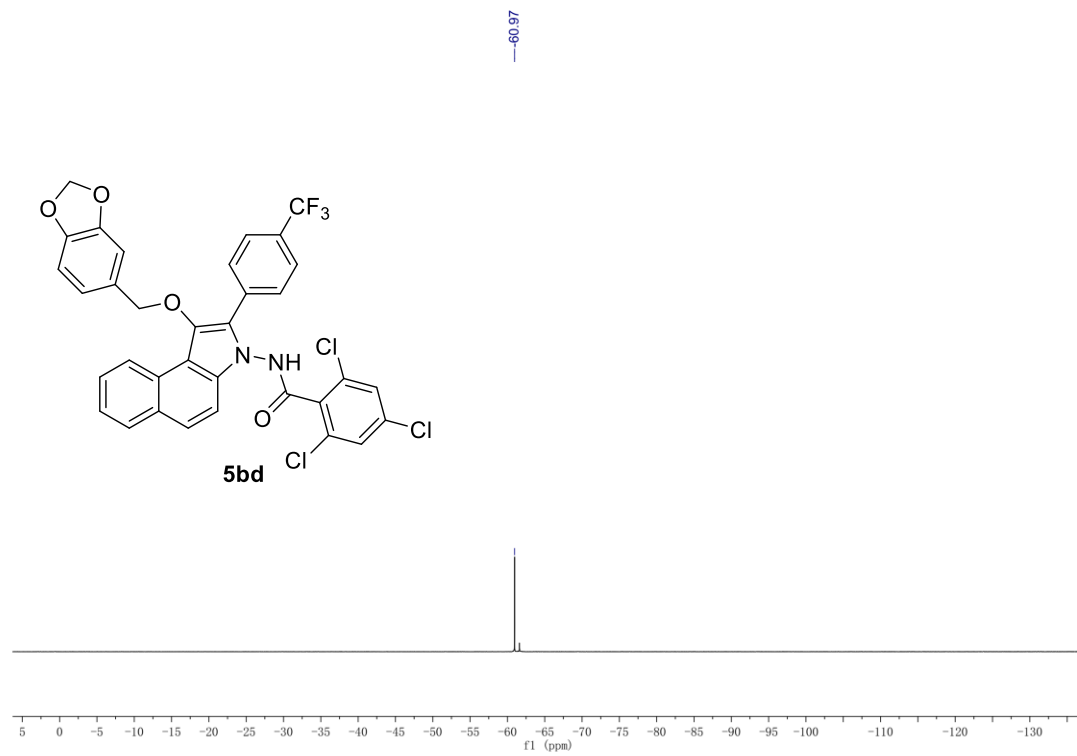

yxr 4-me n2 hjc

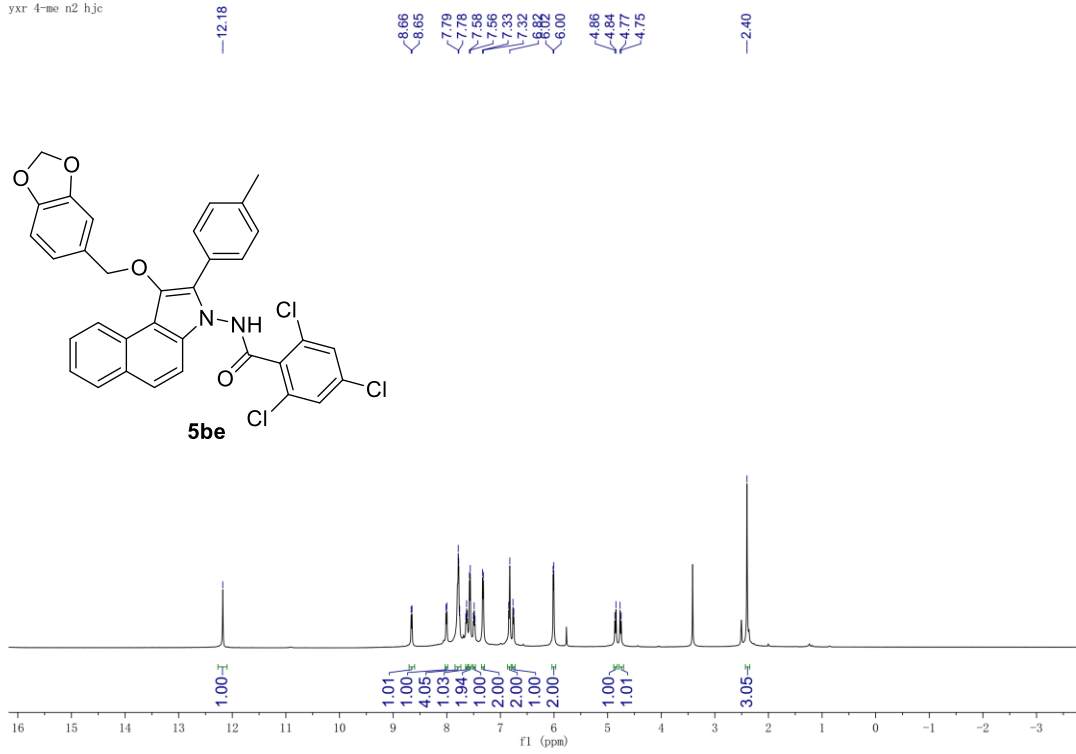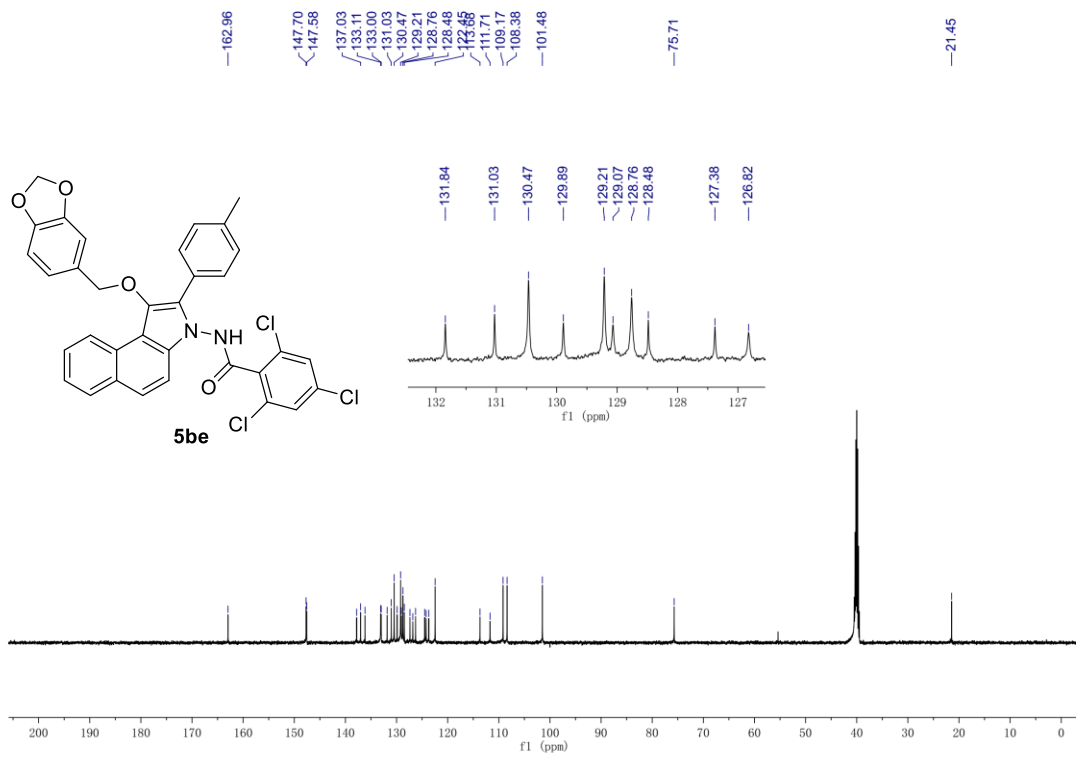

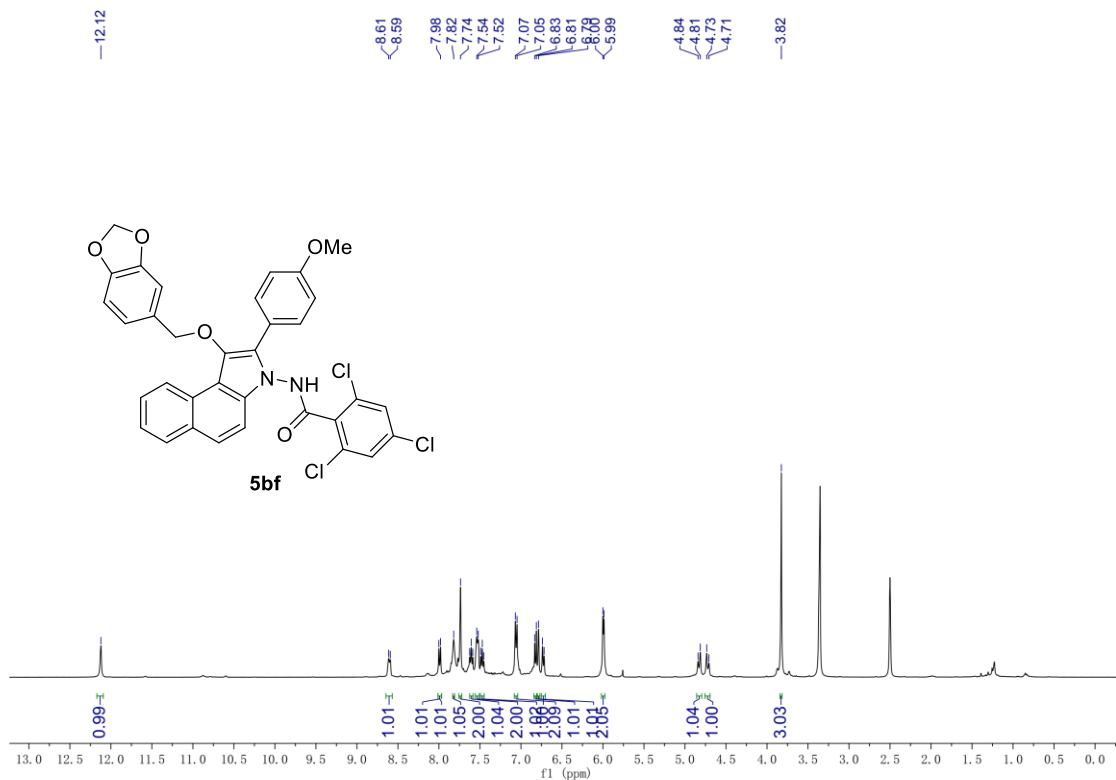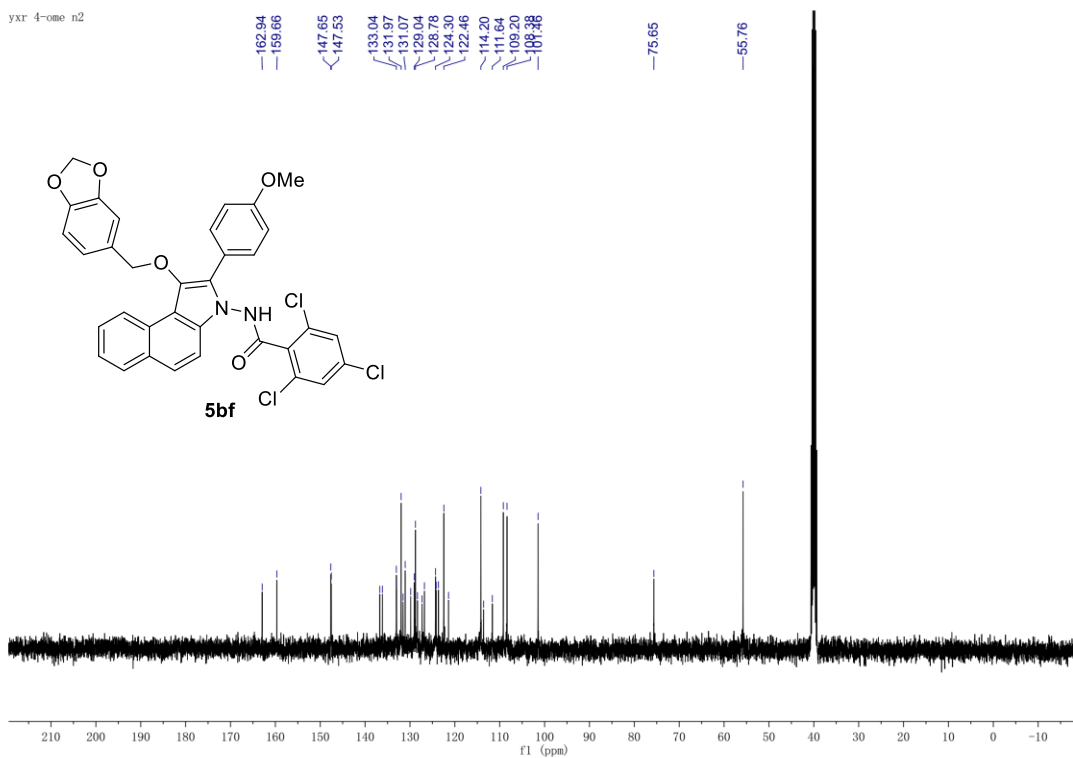

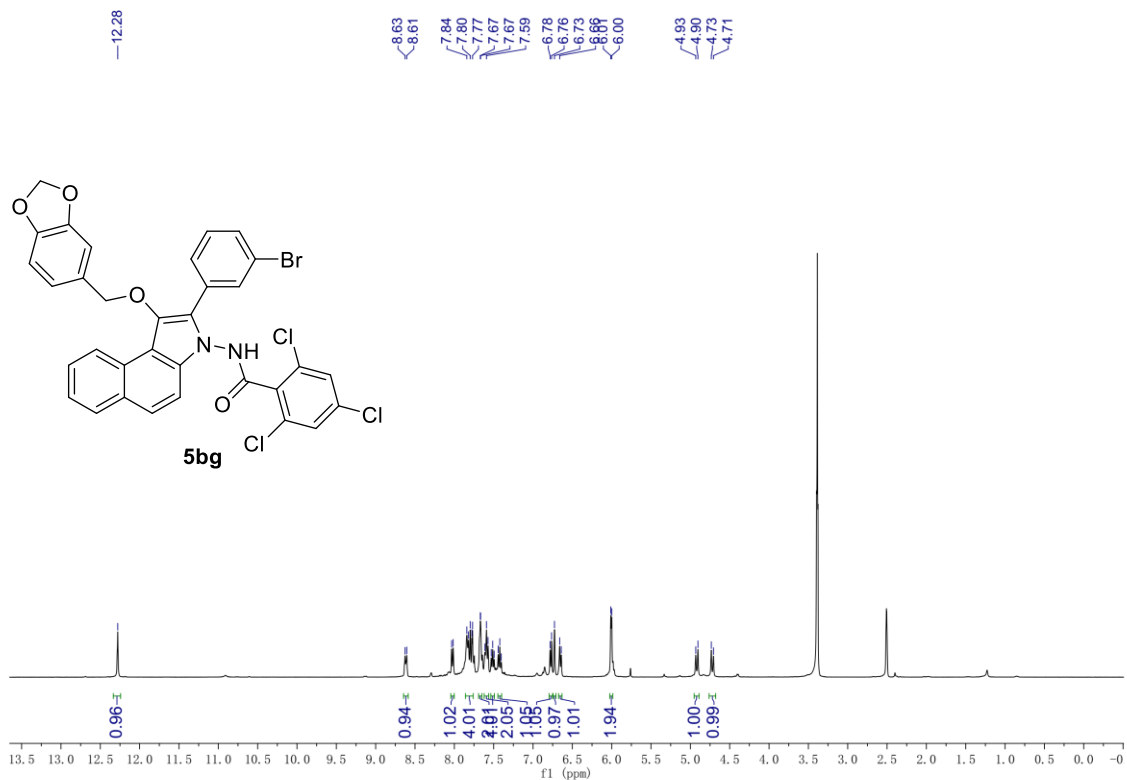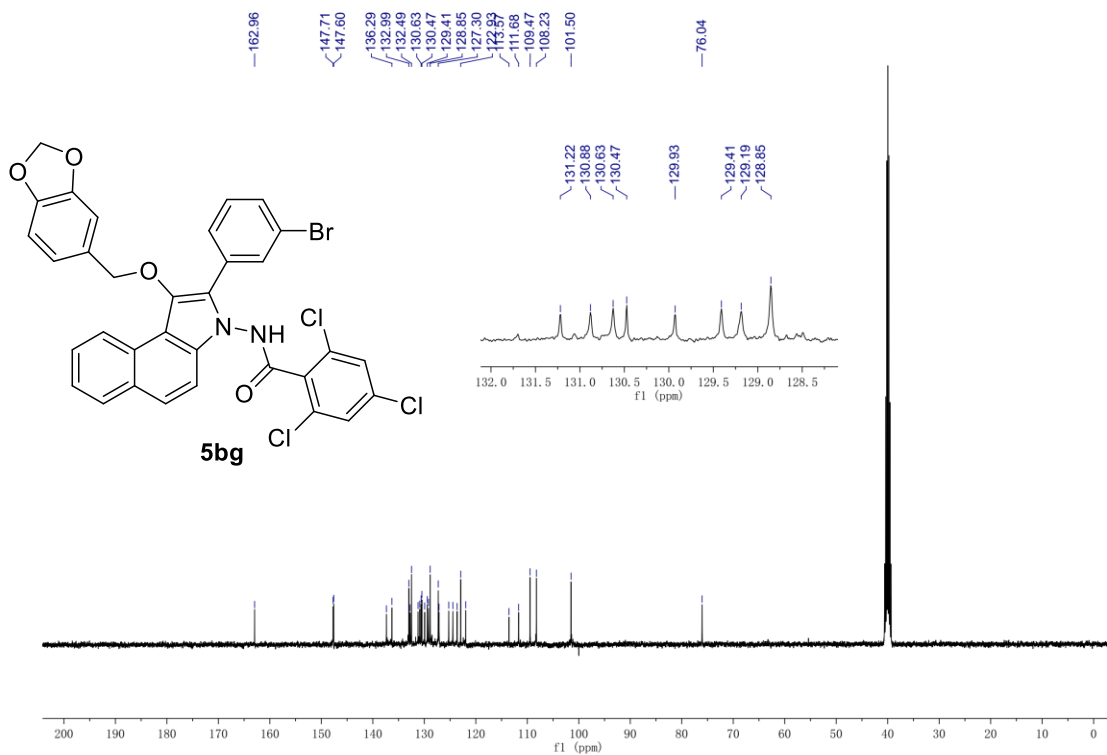

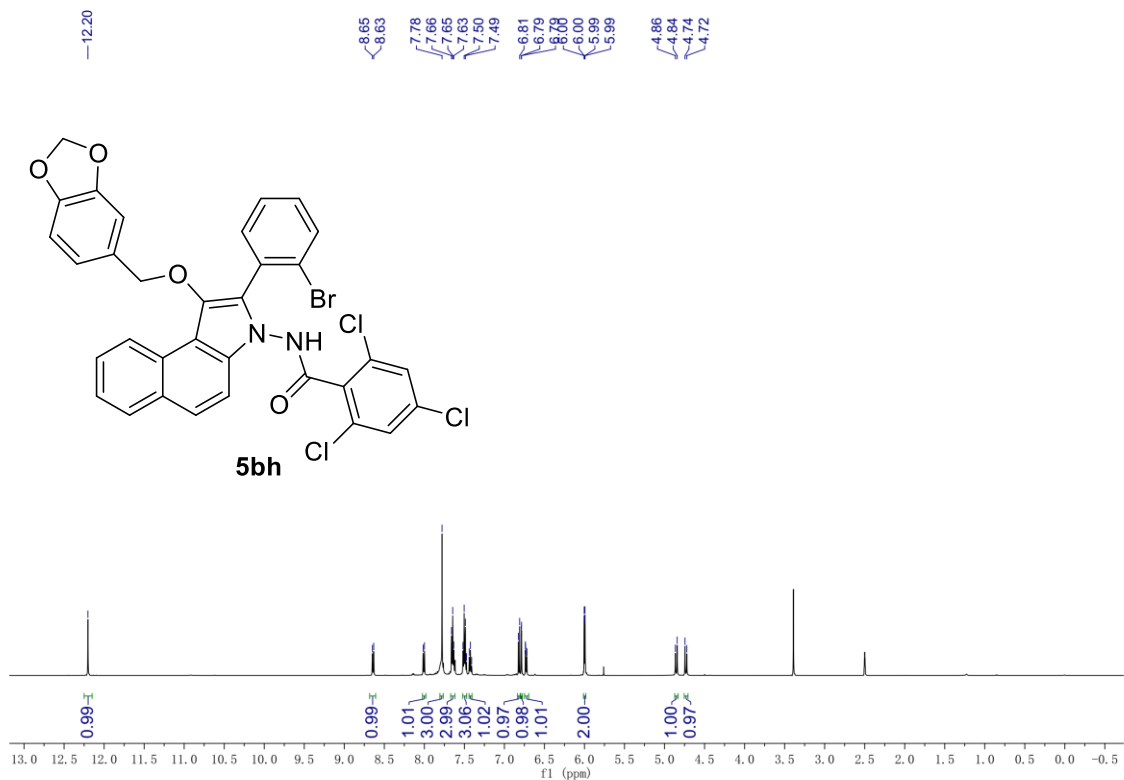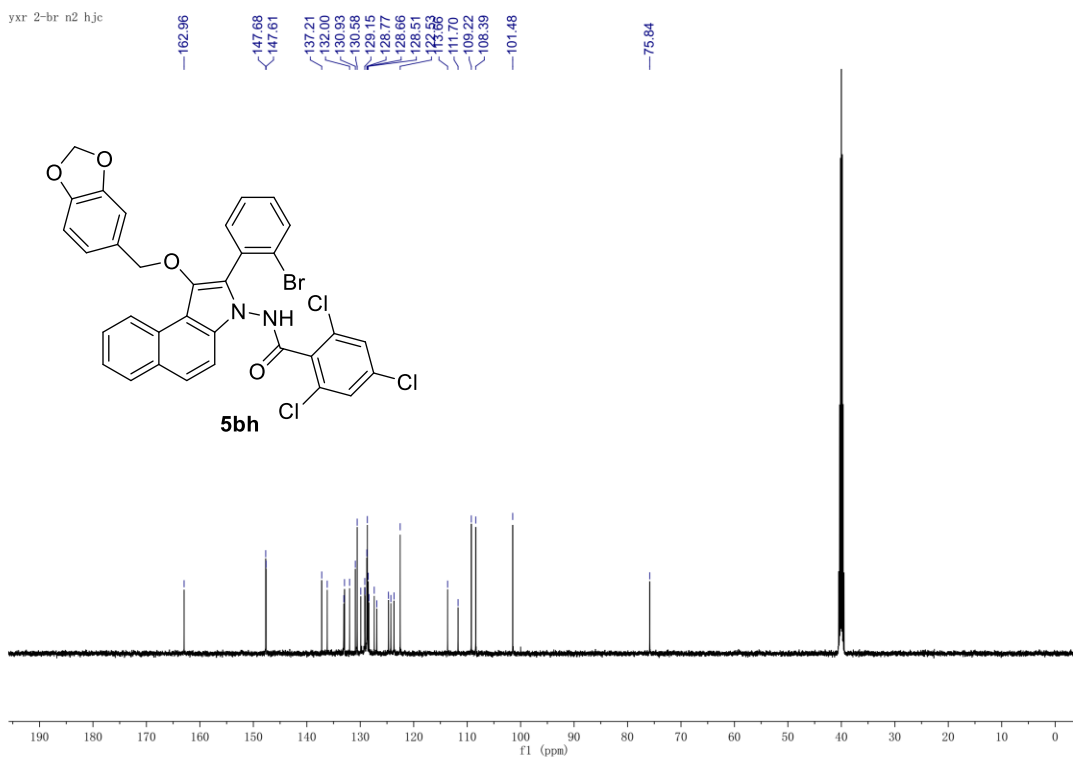

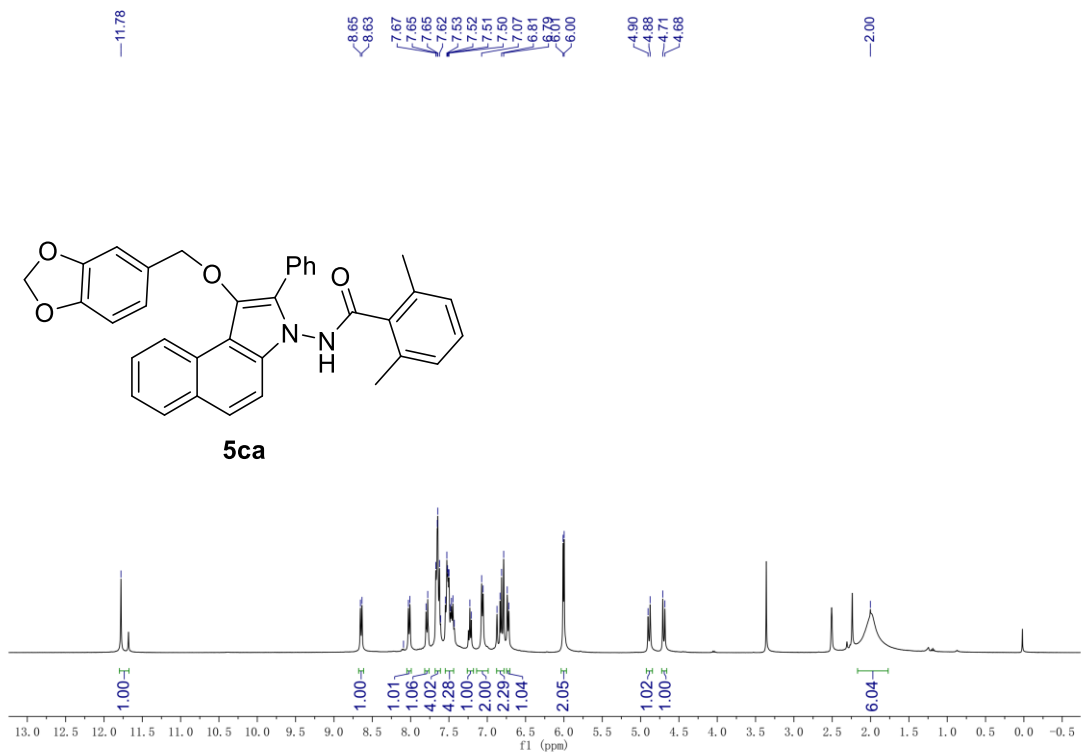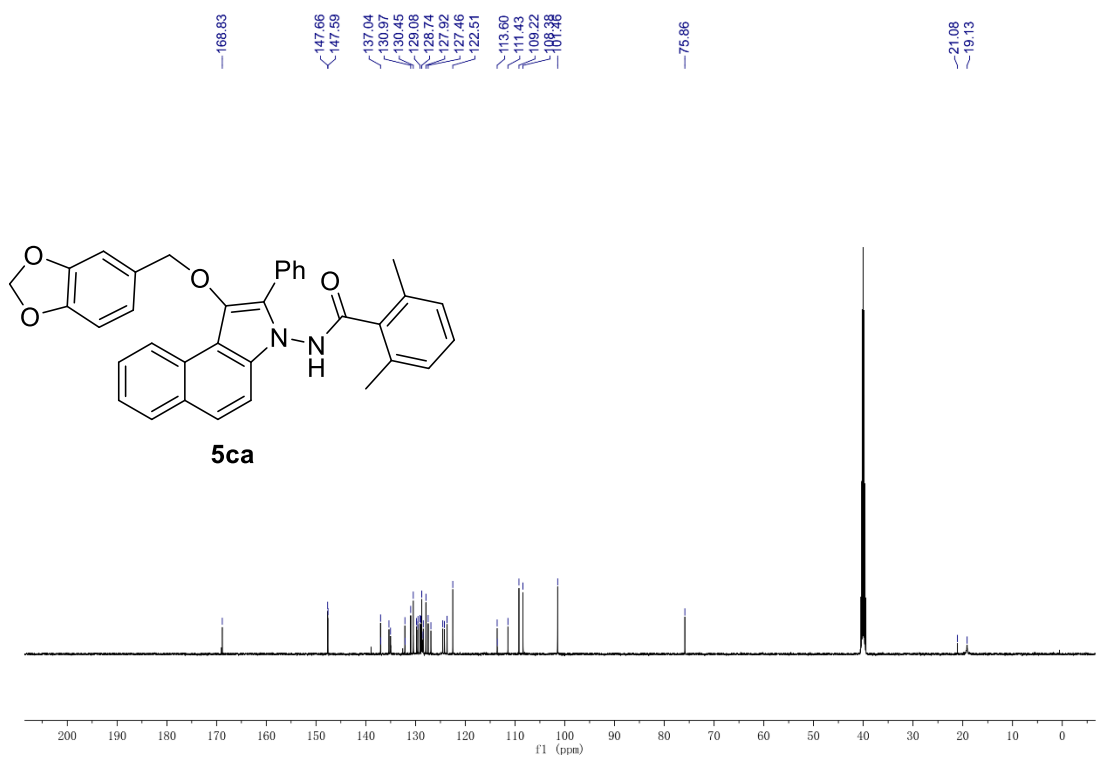



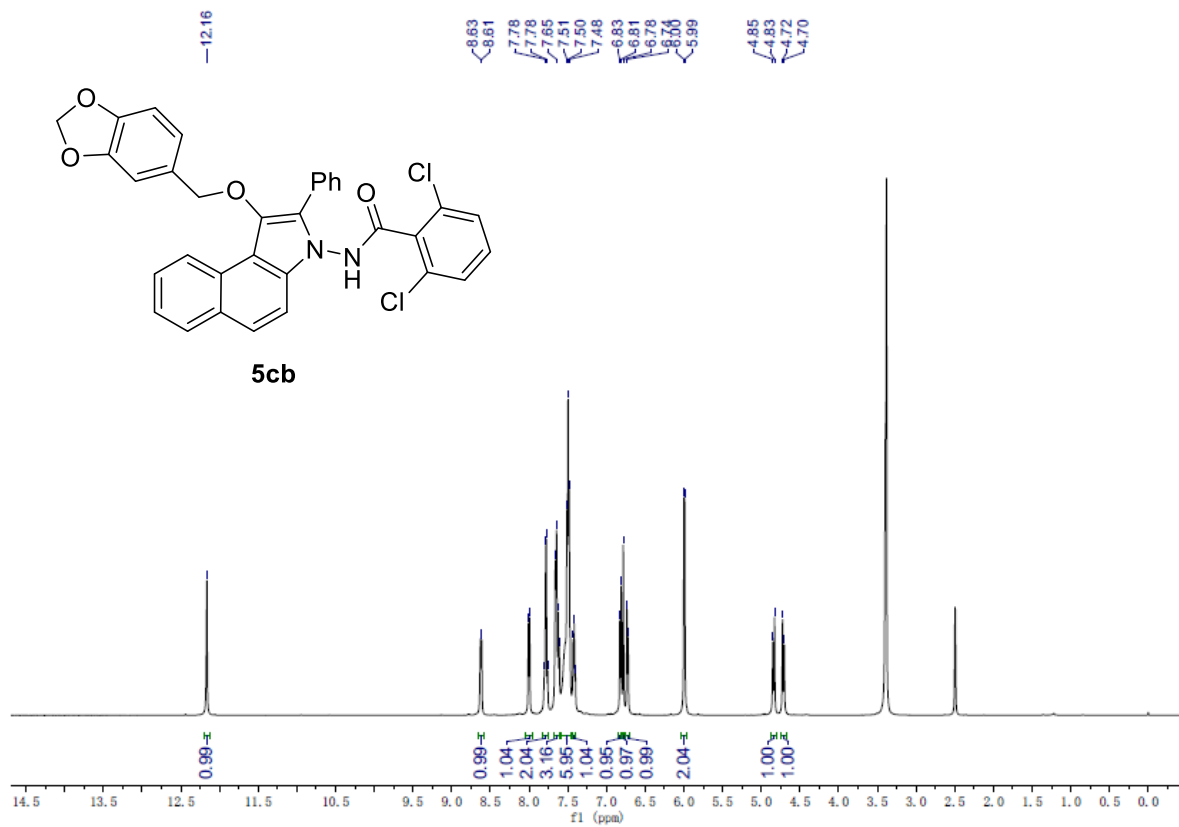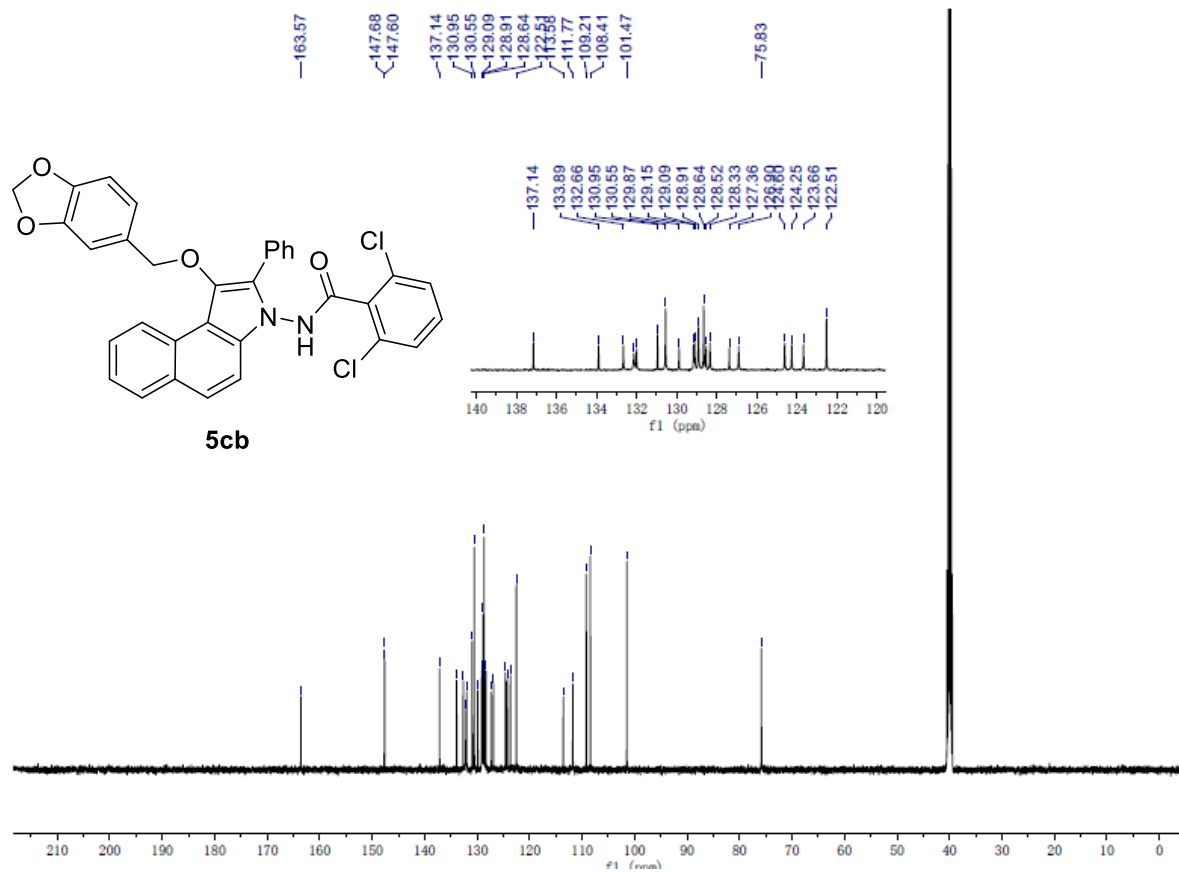

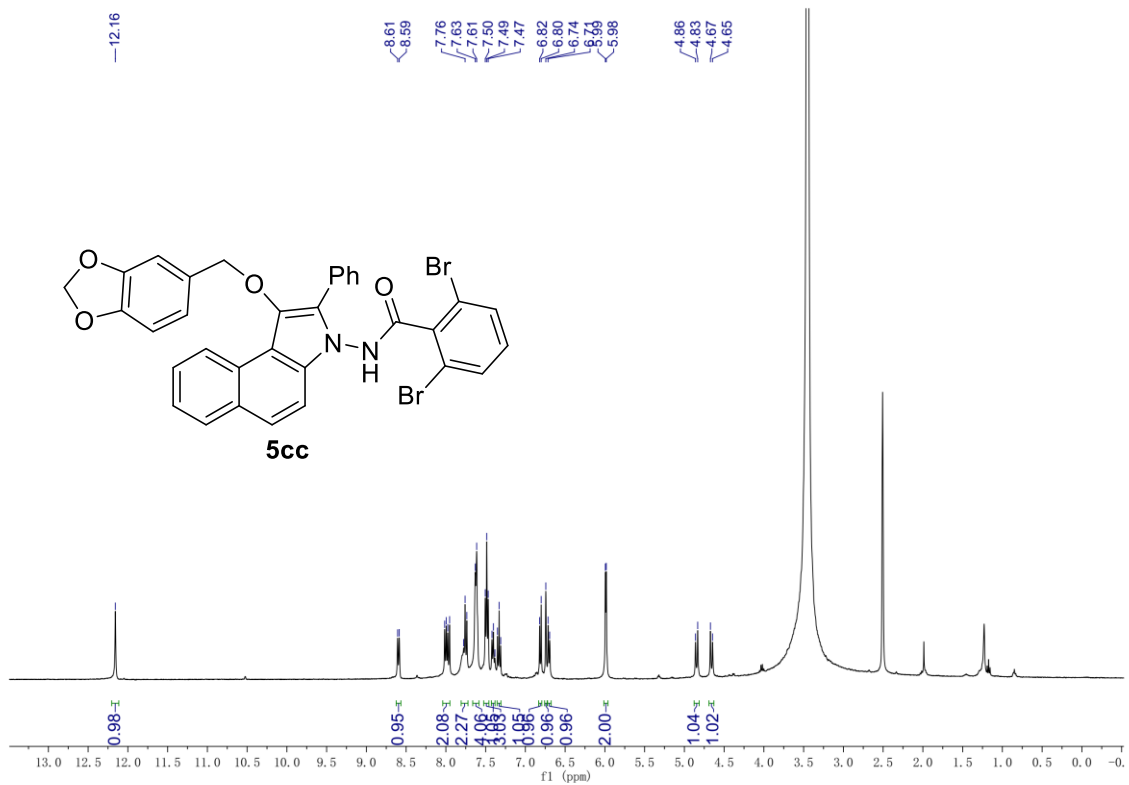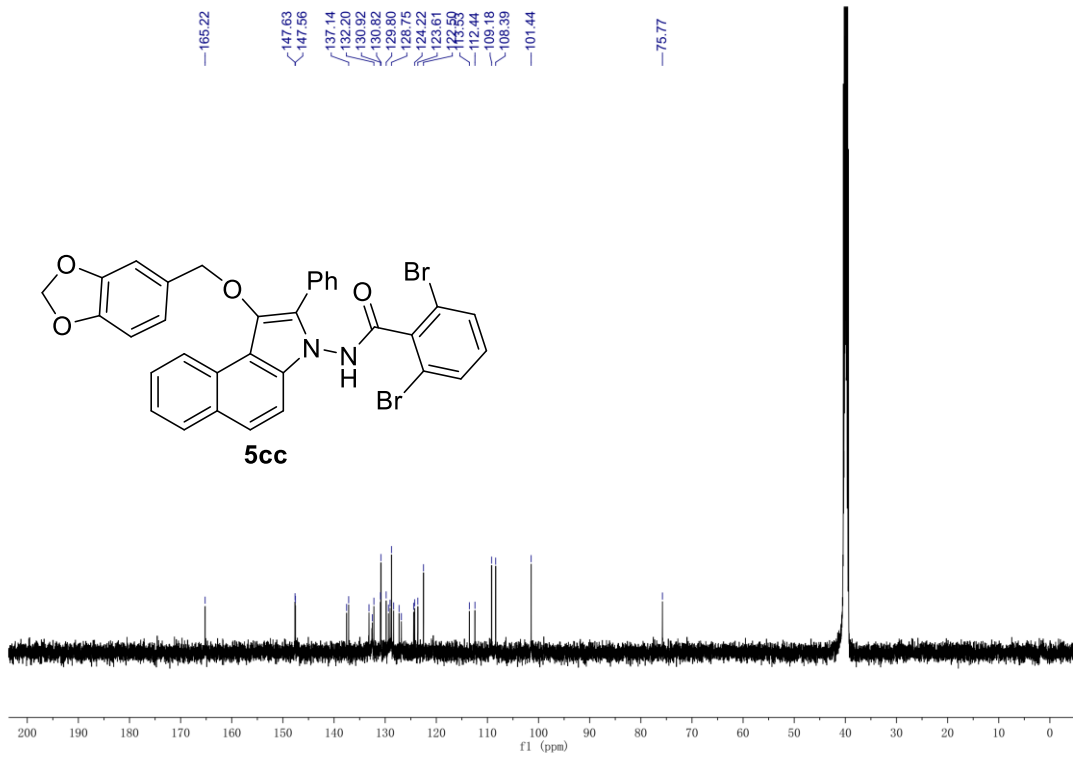

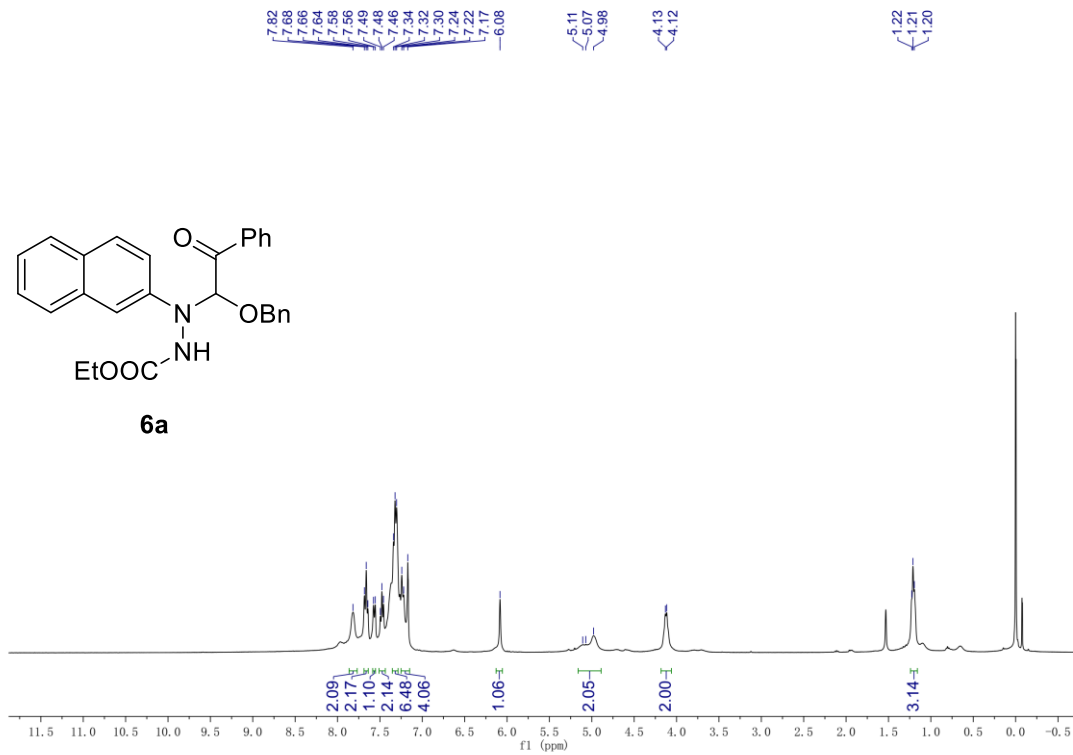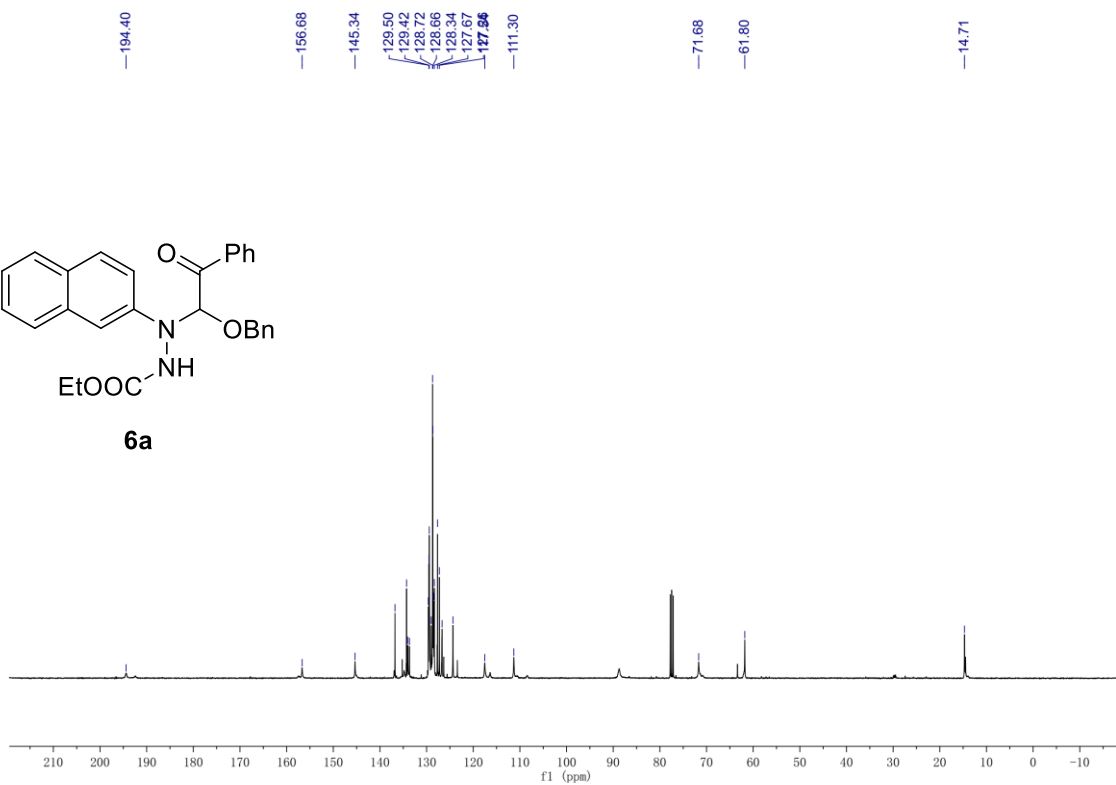

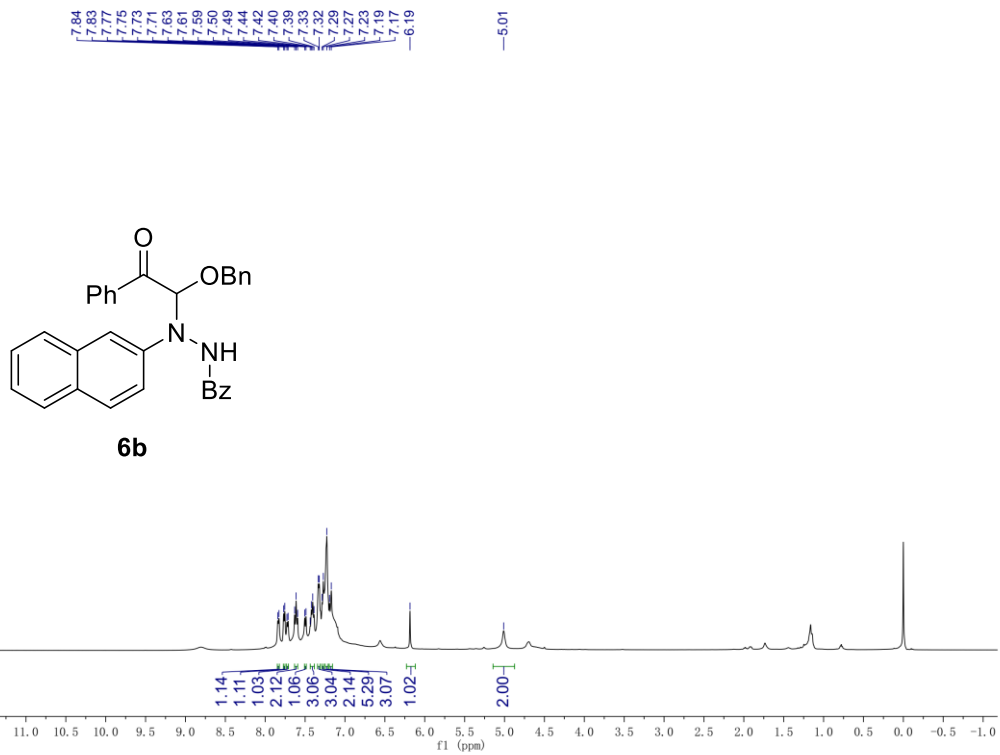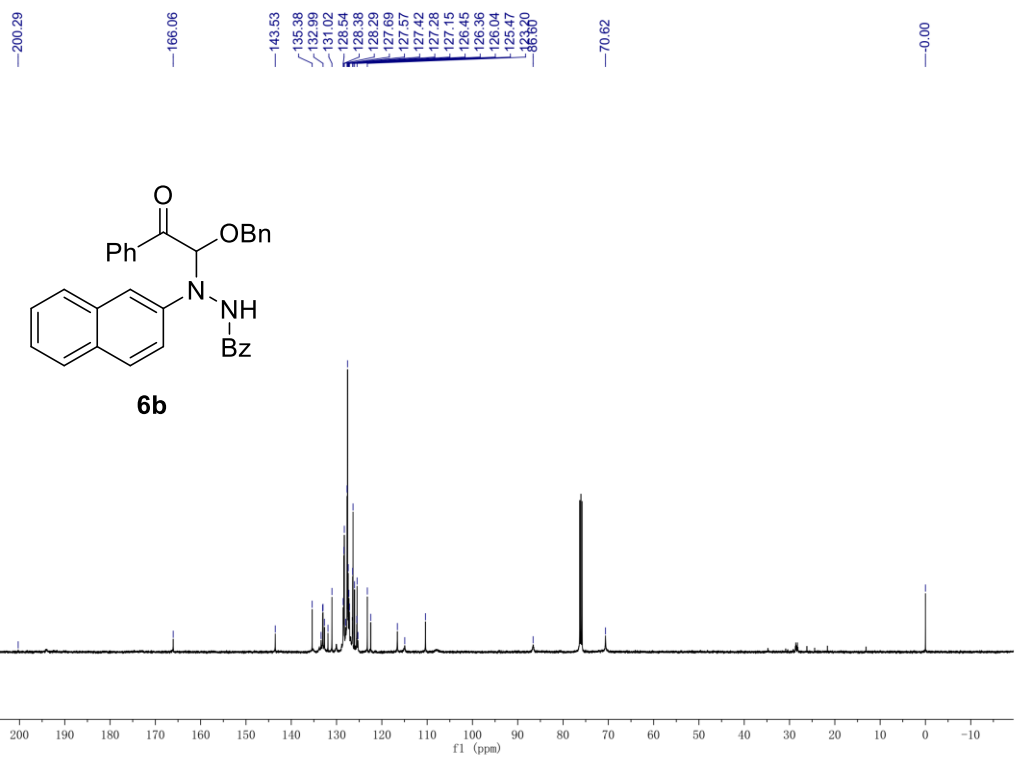

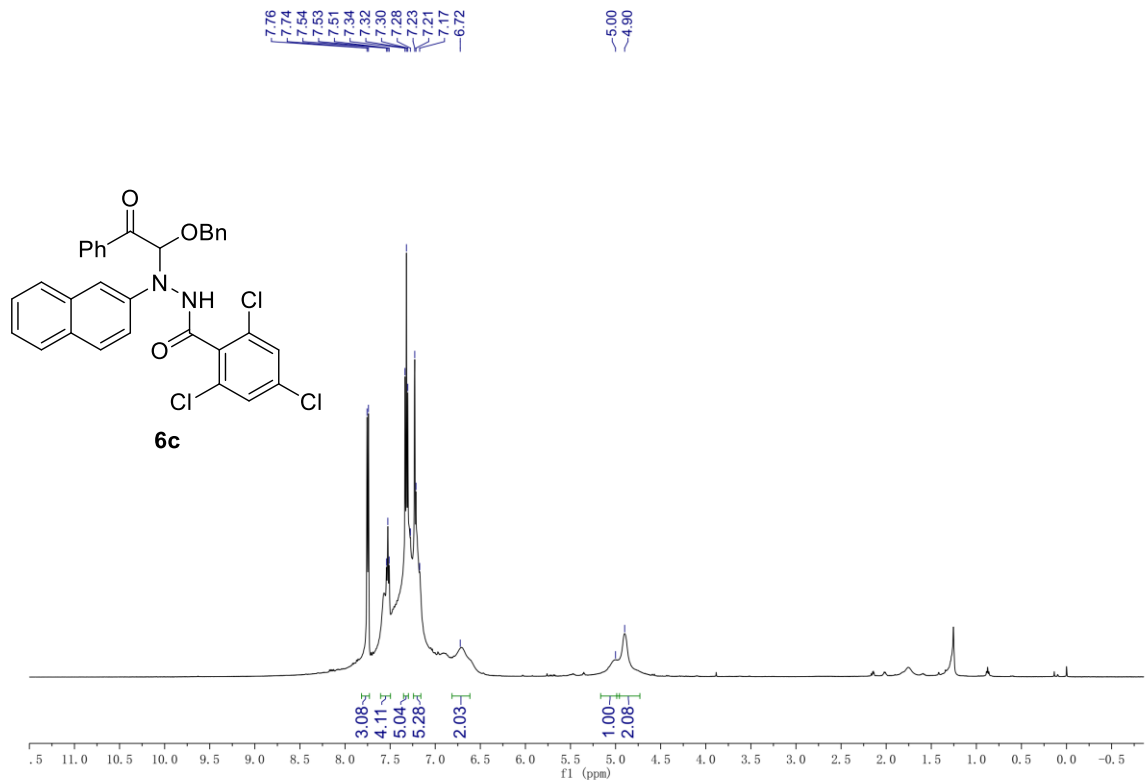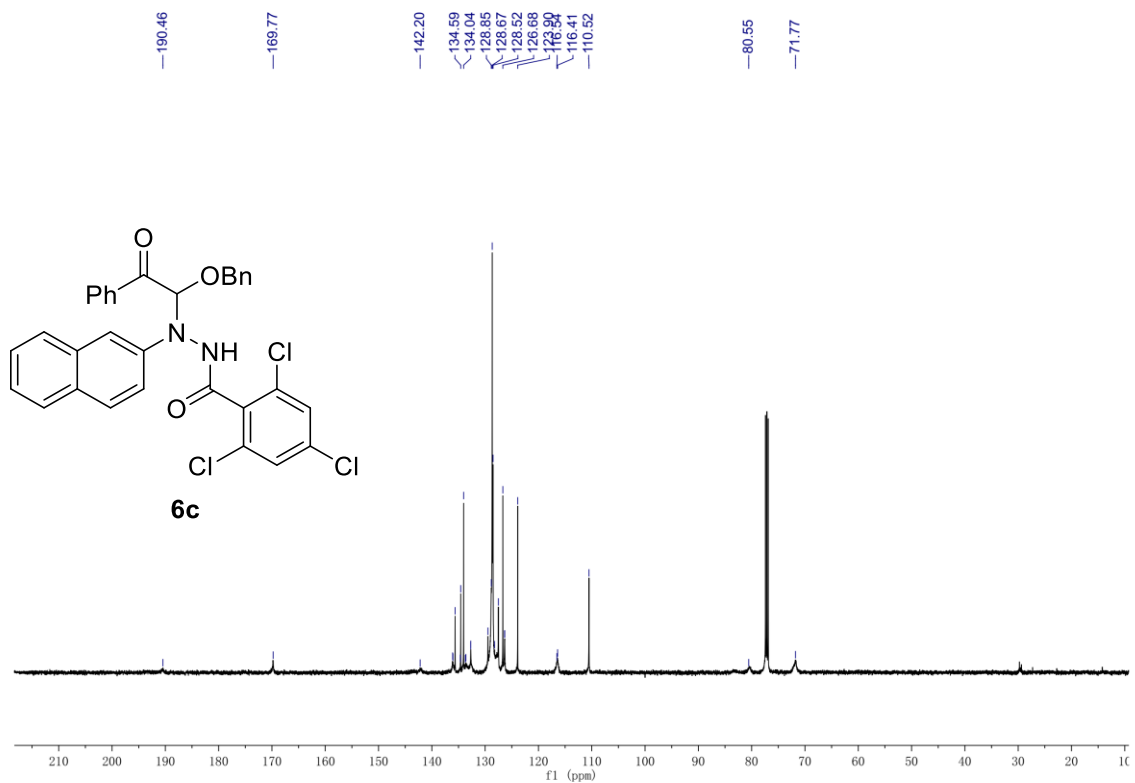

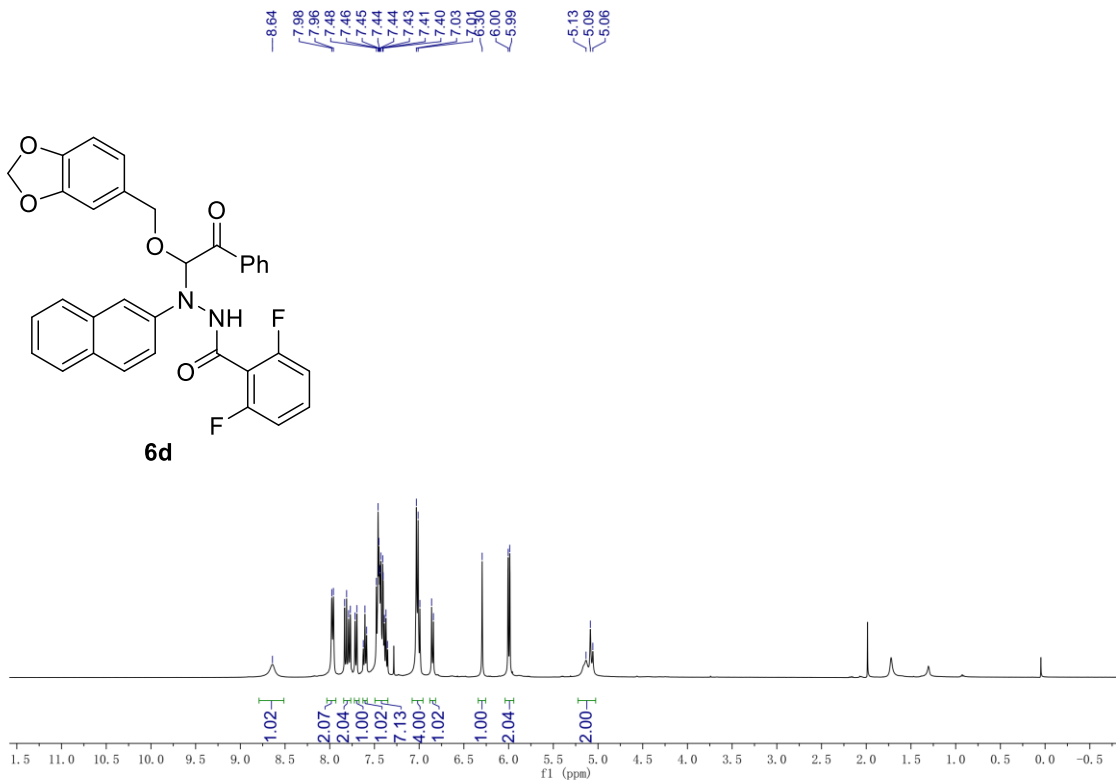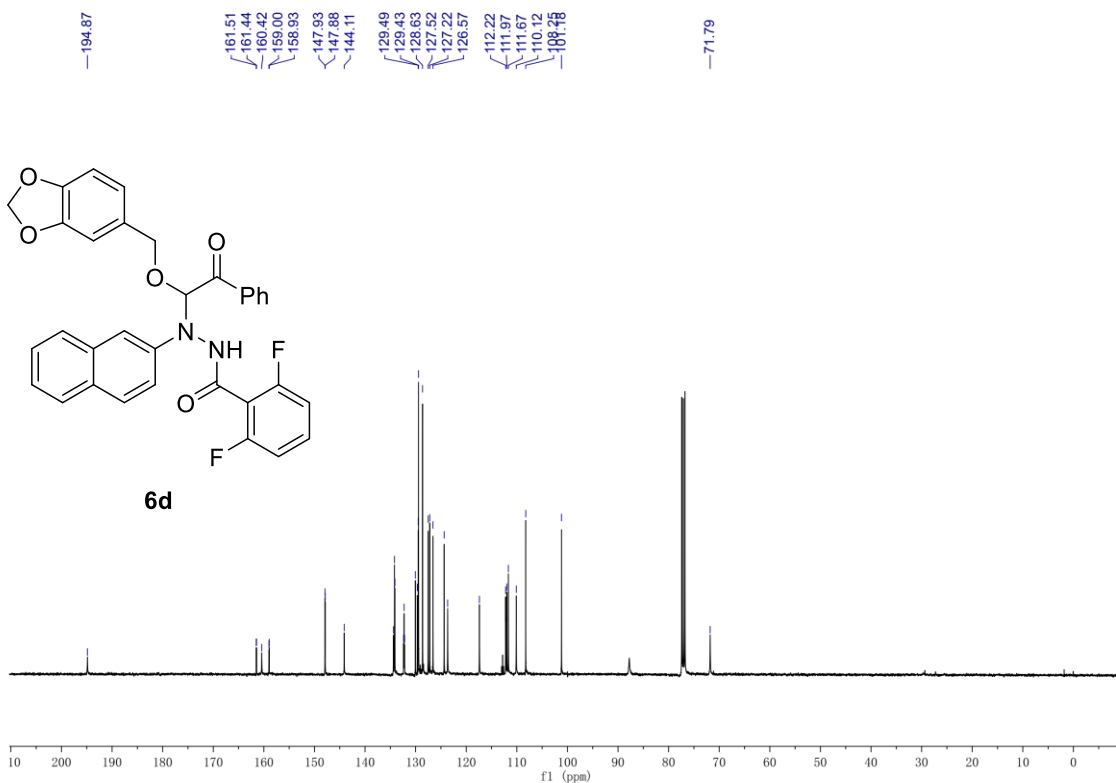

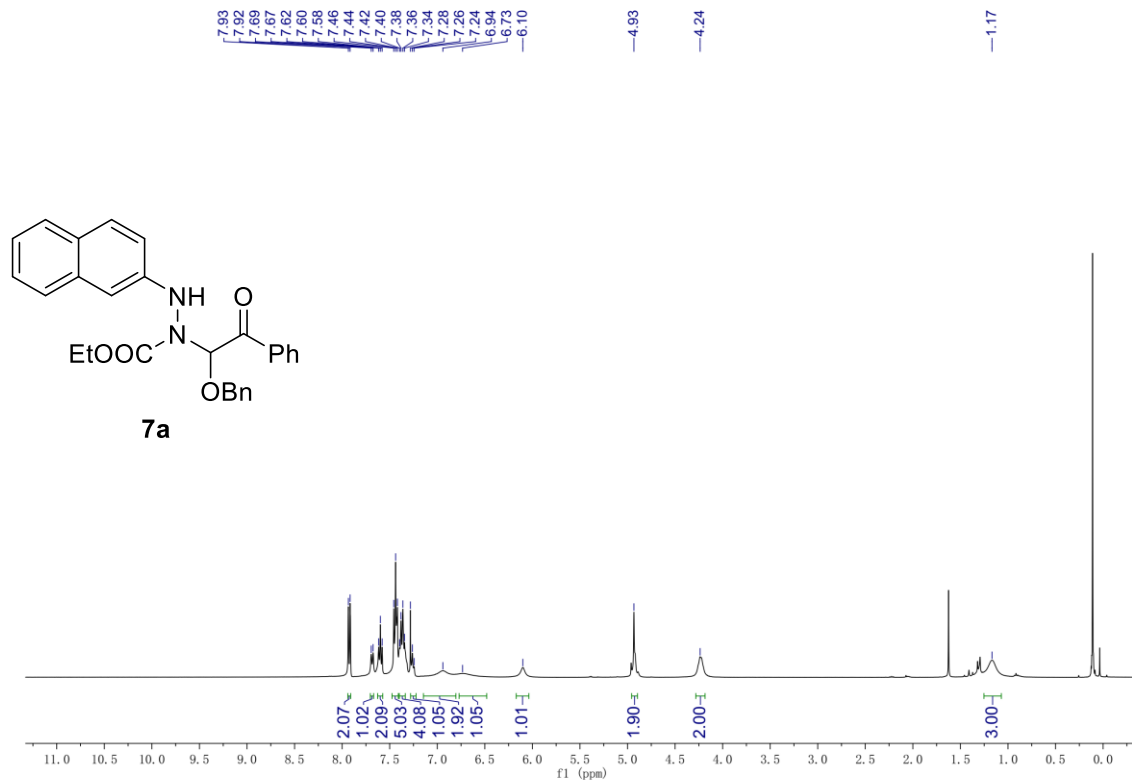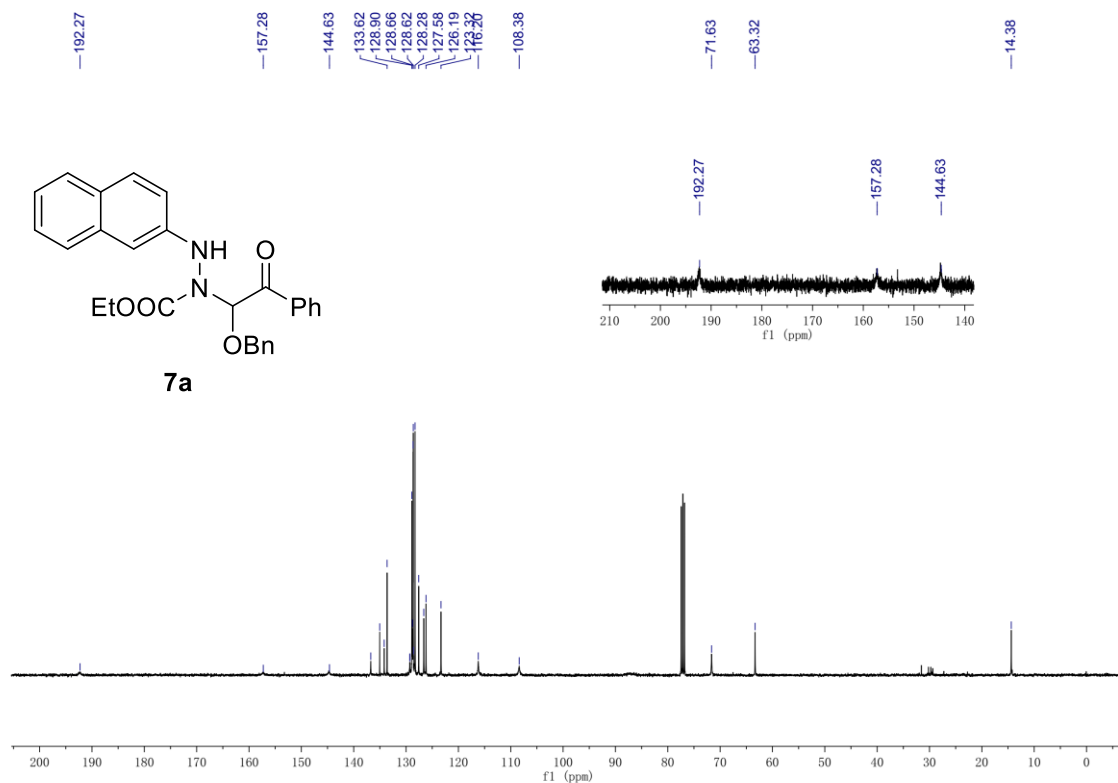

## 9. Single-Crystal X-ray Diffraction of 5p, 5t and 7a

Crystallographic Data for Compound **5p** (CCDC No. 2026832):

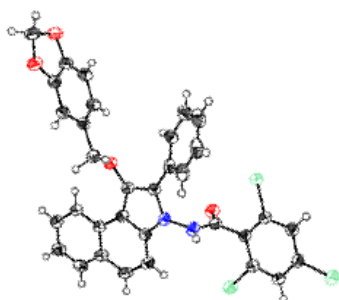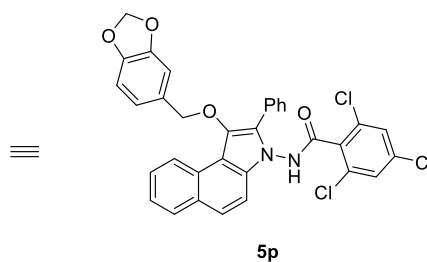

Bond precision: C-C = 0.0041 Å      Wavelength=1.54184  
 Cell:                    a=14.0142 (4)      b=21.0380 (5)      c=9.3503 (3)  
                               alpha=90            beta=90.176 (2)    gamma=90  
 Temperature:        100 K

|                        | Calculated        | Reported          |
|------------------------|-------------------|-------------------|
| Volume                 | 2756.74 (14)      | 2756.74 (14)      |
| Space group            | P 21/c            | P 1 21/c 1        |
| Hall group             | -P 2ybc           | -P 2ybc           |
| Moiety formula         | C33 H21 Cl3 N2 O4 | C33 H21 Cl3 N2 O4 |
| Sum formula            | C33 H21 Cl3 N2 O4 | C33 H21 Cl3 N2 O4 |
| Mr                     | 615.87            | 615.87            |
| Dx, g cm <sup>-3</sup> | 1.484             | 1.484             |
| Z                      | 4                 | 4                 |
| Mu (mm <sup>-1</sup> ) | 3.375             | 3.375             |
| F000                   | 1264.0            | 1264.0            |
| F000'                  | 1271.68           |                   |
| h, k, lmax             | 17, 26, 11        | 17, 26, 11        |
| Nref                   | 5827              | 5747              |
| Tmin, Tmax             | 0.817, 0.845      | 0.755, 1.000      |
| Tmin'                  | 0.363             |                   |

Correction method= # Reported T Limits: Tmin=0.755 Tmax=1.000  
 AbsCorr = MULTI-SCAN

Data completeness= 0.986      Theta(max)= 76.979

R(reflections)= 0.0542 ( 4720)      wR2(reflections)= 0.1261 ( 5747)

S = 1.060      Npar= 379

### Alert level C

|                          |                                                 |              |
|--------------------------|-------------------------------------------------|--------------|
| <b>PLAT340 ALERT 3 C</b> | Low Bond Precision on C-C Bonds .....           | 0.00409 Ang. |
| <b>PLAT906 ALERT 3 C</b> | Large K Value in the Analysis of Variance ..... | 8.436 Check  |
| <b>PLAT906 ALERT 3 C</b> | Large K Value in the Analysis of Variance ..... | 2.787 Check  |

### Alert level G

|                          |                                                  |              |
|--------------------------|--------------------------------------------------|--------------|
| <b>PLAT007 ALERT 5 G</b> | Number of Unrefined Donor-H Atoms .....          | 1 Report     |
| <b>PLAT398 ALERT 2 G</b> | Deviating C-O-C Angle From 120 for O26           | 106.0 Degree |
| <b>PLAT398 ALERT 2 G</b> | Deviating C-O-C Angle From 120 for O28           | 105.1 Degree |
| <b>PLAT883 ALERT 1 G</b> | No Info/Value for _atom_sites_solution_primary   | Please Do !  |
| <b>PLAT912 ALERT 4 G</b> | Missing # of FCF Reflections Above STh/L= 0.600  | 79 Note      |
| <b>PLAT933 ALERT 2 G</b> | Number of OMIT Records in Embedded .res File ... | 1 Note       |
| <b>PLAT978 ALERT 2 G</b> | Number C-C Bonds with Positive Residual Density. | 5 Info       |

0 **ALERT level A** = Most likely a serious problem - resolve or explain  
 0 **ALERT level B** = A potentially serious problem, consider carefully  
 3 **ALERT level C** = Check. Ensure it is not caused by an omission or oversight  
 7 **ALERT level G** = General information/check it is not something unexpected

1 ALERT type 1 CIF construction/syntax error, inconsistent or missing data  
 4 ALERT type 2 Indicator that the structure model may be wrong or deficient  
 3 ALERT type 3 Indicator that the structure quality may be low  
 1 ALERT type 4 Improvement, methodology, query or suggestion  
 1 ALERT type 5 Informative message, check



## Crystallographic Data for Compound **5t** (CCDC No. 1964942)

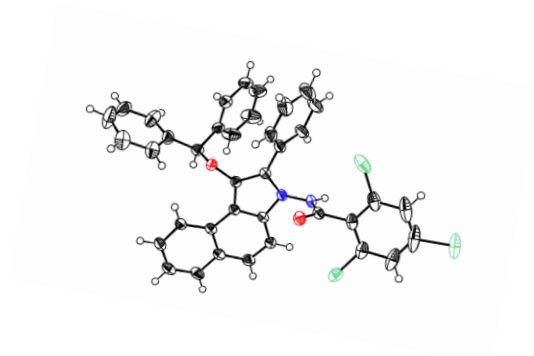

≡

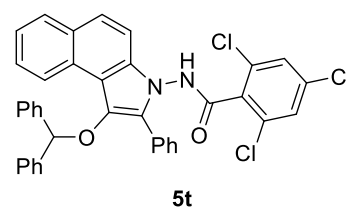

|                                                               |                                     |                                 |
|---------------------------------------------------------------|-------------------------------------|---------------------------------|
| Bond precision:                                               | C-C = 0.0052 Å                      | Wavelength=1.54184              |
| Cell:                                                         | a=26.6744(1)                        | b=26.6744(1)    c=18.1796(1)    |
|                                                               | alpha=90                            | beta=90    gamma=90             |
| Temperature:                                                  | 100 K                               |                                 |
|                                                               | Calculated                          | Reported                        |
| Volume                                                        | 12935.22(12)                        | 12935.22(12)                    |
| Space group                                                   | I 41/a                              | I 41/a                          |
| Hall group                                                    | -I 4ad                              | -I 4ad                          |
| Moiety formula                                                | 4(C38 H25 Cl3 N2 O2), S [+ solvent] | 4(C38 H25 Cl3 N2 O2), S         |
| Sum formula                                                   | C152 H100 Cl12 N8 O8 S [+ solvent]  | C152 H108 Cl12 N8 O8 S          |
| Mr                                                            | 2623.86                             | 2631.92                         |
| Dx, g cm <sup>-3</sup>                                        | 1.347                               | 1.351                           |
| Z                                                             | 4                                   | 4                               |
| Mu (mm <sup>-1</sup> )                                        | 3.012                               | 3.012                           |
| F000                                                          | 5408.0                              | 5440.0                          |
| F000'                                                         | 5439.87                             |                                 |
| h, k, lmax                                                    | 33, 33, 22                          | 33, 33, 22                      |
| Nref                                                          | 6838                                | 6752                            |
| Tmin, Tmax                                                    | 0.510, 0.547                        | 0.771, 1.000                    |
| Tmin'                                                         | 0.386                               |                                 |
| Correction method= # Reported T Limits: Tmin=0.771 Tmax=1.000 |                                     |                                 |
| AbsCorr = MULTI-SCAN                                          |                                     |                                 |
| Data completeness=                                            | 0.987                               | Theta(max)= 77.023              |
| R(reflections)=                                               | 0.0770( 6576)                       | wR2(reflections)= 0.1989( 6752) |
| S =                                                           | 1.061                               | Npar= 418                       |

**Alert level C**

|                   |                                                                                                   |             |
|-------------------|---------------------------------------------------------------------------------------------------|-------------|
| DIFMX02 ALERT 1 C | The maximum difference density is > 0.1*ZMAX*0.75<br>The relevant atom site should be identified. |             |
| PLAT094 ALERT 2 C | Ratio of Maximum / Minimum Residual Density ...                                                   | 2.37 Report |
| PLAT097 ALERT 2 C | Large Reported Max. (Positive) Residual Density                                                   | 1.61 eA-3   |
| PLAT220 ALERT 2 C | Non-Solvent Resd 1 C Ueq(max)/Ueq(min) Range                                                      | 3.1 Ratio   |
| PLAT230 ALERT 2 C | Hirshfeld Test Diff for C00Q --C015                                                               | 6.3 s.u.    |
| PLAT241 ALERT 2 C | High 'MainMol' Ueq as Compared to Neighbors of                                                    | C019 Check  |
| PLAT336 ALERT 2 C | Long Bond Distance for .... C012 -Cl2A                                                            | 1.868 Ang.  |
| PLAT340 ALERT 3 C | Low Bond Precision on C-C Bonds .....                                                             | 0.0052 Ang. |
| PLAT906 ALERT 3 C | Large K Value in the Analysis of Variance .....                                                   | 4.644 Check |
| PLAT918 ALERT 3 C | Reflection(s) with I(obs) much Smaller I(calc)                                                    | 3 Check     |

**Alert level G**

|                   |                                                                                                                                                                                                                                                                                                                            |                          |
|-------------------|----------------------------------------------------------------------------------------------------------------------------------------------------------------------------------------------------------------------------------------------------------------------------------------------------------------------------|--------------------------|
| FORMU01 ALERT 1 G | There is a discrepancy between the atom counts in the<br>_chemical_formula_sum and _chemical_formula_moiety. This is<br>usually due to the moiety formula being in the wrong format.<br>Atom count from _chemical_formula_sum: C152 H108 Cl12 N8 O8 S1<br>Atom count from _chemical_formula_moiety:C152 H100 Cl12 N8 O8 S1 |                          |
| FORMU01 ALERT 2 G | There is a discrepancy between the atom counts in the<br>_chemical_formula_sum and the formula from the _atom_site* data.<br>Atom count from _chemical_formula_sum:C152 H108 Cl12 N8 O8 S1<br>Atom count from the _atom_site data: C152 H100 Cl12 N8 O8 S1                                                                 |                          |
| CELLZ01 ALERT 1 G | Difference between formula and atom_site contents detected.                                                                                                                                                                                                                                                                |                          |
| CELLZ01 ALERT 1 G | WARNING: H atoms missing from atom site list. Is this intentional?<br>From the CIF: _cell_formula_units_Z 4<br>From the CIF: _chemical_formula_sum C152 H108 Cl12 N8 O8 S<br>TEST: Compare cell contents of formula and atom_site data                                                                                     |                          |
|                   | atom                                                                                                                                                                                                                                                                                                                       | Z*formula cif sites diff |
|                   | C                                                                                                                                                                                                                                                                                                                          | 608.00 608.00 0.00       |
|                   | H                                                                                                                                                                                                                                                                                                                          | 432.00 400.00 32.00      |
|                   | Cl                                                                                                                                                                                                                                                                                                                         | 48.00 48.00 0.00         |
|                   | N                                                                                                                                                                                                                                                                                                                          | 32.00 32.00 0.00         |
|                   | O                                                                                                                                                                                                                                                                                                                          | 32.00 32.00 0.00         |
|                   | S                                                                                                                                                                                                                                                                                                                          | 4.00 4.00 0.00           |
| PLAT007 ALERT 5 G | Number of Unrefined Donor-H Atoms .....                                                                                                                                                                                                                                                                                    | 1 Report                 |
| PLAT041 ALERT 1 G | Calc. and Reported SumFormula Strings Differ                                                                                                                                                                                                                                                                               | Please Check             |
| PLAT068 ALERT 1 G | Reported F000 Differs from Calcd (or Missing)...                                                                                                                                                                                                                                                                           | Please Check             |
| PLAT083 ALERT 2 G | SHELXL Second Parameter in WGHT Unusually Large                                                                                                                                                                                                                                                                            | 58.76 Why ?              |
| PLAT143 ALERT 4 G | s.u. on c - Axis Small or Missing .....                                                                                                                                                                                                                                                                                    | 0.00010 Ang.             |
| PLAT301 ALERT 3 G | Main Residue Disorder .....(Resd 1 )                                                                                                                                                                                                                                                                                       | 2% Note                  |
| PLAT304 ALERT 4 G | Non-Integer Number of Atoms in ..... Resd 2                                                                                                                                                                                                                                                                                | 0.25 Check               |
| PLAT605 ALERT 4 G | Largest Solvent Accessible VOID in the Structure                                                                                                                                                                                                                                                                           | 31 A**3                  |
| PLAT720 ALERT 4 G | Number of Unusual/Non-Standard Labels .....                                                                                                                                                                                                                                                                                | 69 Note                  |
| PLAT868 ALERT 4 G | ALERTS Due to the Use of _smtbx_masks Suppressed                                                                                                                                                                                                                                                                           | ! Info                   |
| PLAT912 ALERT 4 G | Missing # of FCF Reflections Above STh/L= 0.600                                                                                                                                                                                                                                                                            | 85 Note                  |
| PLAT978 ALERT 2 G | Number C-C Bonds with Positive Residual Density.                                                                                                                                                                                                                                                                           | 3 Info                   |
| PLAT992 ALERT 5 G | Repd & Actual _reflns_number_gt Values Differ by                                                                                                                                                                                                                                                                           | 1 Check                  |

- 0 **ALERT level A** = Most likely a serious problem - resolve or explain  
0 **ALERT level B** = A potentially serious problem, consider carefully  
10 **ALERT level C** = Check. Ensure it is not caused by an omission or oversight  
17 **ALERT level G** = General information/check it is not something unexpected

# Crystallographic Data for Compound **7a** (CCDC No. 1965474)

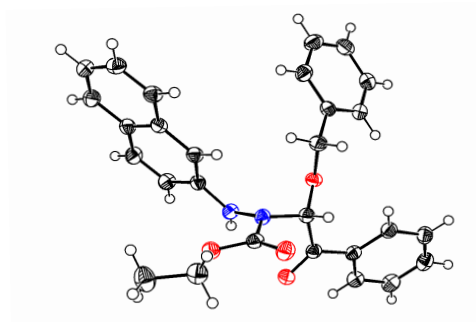

≡

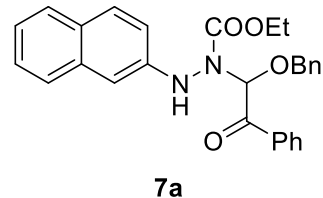

Bond precision: C-C = 0.0020 Å      Wavelength=1.54184

Cell:                    a=10.5825(1)      b=10.9351(2)      c=20.5330(3)  
                               alpha=90            beta=94.269(1)    gamma=90

Temperature:        100 K

|                        | Calculated    | Reported         |
|------------------------|---------------|------------------|
| Volume                 | 2369.50(6)    | 2369.50(6)       |
| Space group            | P 21/c        | P 1 21/c 1       |
| Hall group             | -P 2ybc       | -P 2ybc          |
| Moiety formula         | C28 H26 N2 O4 | C28 H26 N2 O4    |
| Sum formula            | C28 H26 N2 O4 | C30 H26 N0.25 O4 |
| Mr                     | 454.51        | 454.01           |
| Dx, g cm <sup>-3</sup> | 1.274         | 1.273            |
| Z                      | 4             | 4                |
| Mu (mm <sup>-1</sup> ) | 0.691         | 0.671            |
| F000                   | 960.0         | 959.0            |
| F000'                  | 962.92        |                  |
| h, k, lmax             | 13, 13, 25    | 13, 13, 25       |
| Nref                   | 4975          | 4708             |
| Tmin, Tmax             | 0.851, 0.935  | 0.564, 1.000     |
| Tmin'                  | 0.818         |                  |

Correction method= # Reported T Limits: Tmin=0.564 Tmax=1.000  
 AbsCorr = MULTI-SCAN

Data completeness= 0.946      Theta(max)= 76.542

R(reflections)= 0.0429( 4214)      wR2(reflections)= 0.1325( 4708)

S = 0.783      Npar= 308

---

**Alert level C**

**GOODF01 ALERT 2 C** The least squares goodness of fit parameter lies outside the range 0.80 <> 2.00  
Goodness of fit given = 0.783

|                          |                                                |                                    |              |
|--------------------------|------------------------------------------------|------------------------------------|--------------|
| <b>PLATO41 ALERT 1 C</b> | Calc. and Reported SumFormula                  | Strings Differ                     | Please Check |
| <b>PLATO43 ALERT 1 C</b> | Calculated and Reported Mol. Weight            | Differ by ..                       | 0.50 Check   |
| <b>PLATO68 ALERT 1 C</b> | Reported F000                                  | Differs from Calcd (or Missing)... | Please Check |
| <b>PLAT911 ALERT 3 C</b> | Missing FCF Refl Between Thmin & STh/L=        | 0.600                              | 4 Report     |
| <b>PLAT918 ALERT 3 C</b> | Reflection(s) with I(obs) much Smaller I(calc) | .                                  | 2 Check      |
| <b>PLAT975 ALERT 2 C</b> | Check Calcd Resid. Dens.                       | 1.00A From N11                     | 0.45 eA-3    |
| <b>PLAT976 ALERT 2 C</b> | Check Calcd Resid. Dens.                       | 0.97A From N11                     | -0.54 eA-3   |
| <b>PLAT977 ALERT 2 C</b> | Check Negative Difference Density on H11       |                                    | -0.39 eA-3   |

---

**Alert level G**

**FORMU01 ALERT 1 G** There is a discrepancy between the atom counts in the `_chemical_formula_sum` and `_chemical_formula_moiety`. This is usually due to the moiety formula being in the wrong format.  
Atom count from `_chemical_formula_sum`: C30 H26 N0.25 O4  
Atom count from `_chemical_formula_moiety`: C28 H26 N2 O4

**FORMU01 ALERT 2 G** There is a discrepancy between the atom counts in the `_chemical_formula_sum` and the formula from the `_atom_site*` data.  
Atom count from `_chemical_formula_sum`: C30 H26 N0.25 O4  
Atom count from the `_atom_site` data: C28 H26 N2 O4

**CELLZ01 ALERT 1 G** Difference between formula and atom\_site contents detected.

**CELLZ01 ALERT 1 G** ALERT: Large difference may be due to a symmetry error - see SYMMG tests  
From the CIF: `_cell_formula_units_Z` 4  
From the CIF: `_chemical_formula_sum` C30 H26 N0.25 O4  
TEST: Compare cell contents of formula and atom\_site data

| atom | Z*formula | cif sites | diff  |
|------|-----------|-----------|-------|
| C    | 120.00    | 112.00    | 8.00  |
| H    | 104.00    | 104.00    | 0.00  |
| N    | 1.00      | 8.00      | -7.00 |
| O    | 16.00     | 16.00     | 0.00  |

|                          |                                                  |             |
|--------------------------|--------------------------------------------------|-------------|
| <b>PLATO07 ALERT 5 G</b> | Number of Unrefined Donor-H Atoms .....          | 1 Report    |
| <b>PLATO72 ALERT 2 G</b> | SHELXL First Parameter in Wght Unusually Large   | 0.10 Report |
| <b>PLAT793 ALERT 4 G</b> | Model has Chirality at C17 (Centro SPGR)         | S Verify    |
| <b>PLAT912 ALERT 4 G</b> | Missing # of FCF Reflections Above STh/L= 0.600  | 264 Note    |
| <b>PLAT913 ALERT 3 G</b> | Missing # of Very Strong Reflections in FCF ...  | 1 Note      |
| <b>PLAT978 ALERT 2 G</b> | Number C-C Bonds with Positive Residual Density. | 8 Info      |

---

0 **ALERT level A** = Most likely a serious problem - resolve or explain  
0 **ALERT level B** = A potentially serious problem, consider carefully  
9 **ALERT level C** = Check. Ensure it is not caused by an omission or oversight  
10 **ALERT level G** = General information/check it is not something unexpected

6 ALERT type 1 CIF construction/syntax error, inconsistent or missing data  
7 ALERT type 2 Indicator that the structure model may be wrong or deficient  
3 ALERT type 3 Indicator that the structure quality may be low  
2 ALERT type 4 Improvement, methodology, query or suggestion  
1 ALERT type 5 Informative message, check

---
